# Supplementary material for: Genetic insight into putative causes of xanthelasma palpebrarum: a Mendelian randomization study
Source: Front Immunol. 2024 Mar 27;15:1347112. doi: 10.3389/fimmu.2024.1347112 (PMC11004296; doi:10.3389/fimmu.2024.1347112)
Supplement: Supplementary Table 4 — MR results of circulating proteins to XP. The protein quantitative trait loci (pQTLs) are used as genetic IVs in the MR study, and we integrate this plasma proteome with the XP GWAS, correspondent to Figure 3 . Method, methods used in MR analysis; N SNP, number of valid SNPs used in MR analysis; Beta, the effect estimated using the genetic variants; SE, standard deviation of beta; P-value (FDR adjusted), false discovery rate adjusted P value for multiple testing correction; Egger Intercept, the intercept term using MR-Egger method for assessing the pleiotropic effects; Egger Intercept P value, P value of MR-Egger method; SNP r2 exposure, estimated variance explained in exposure; SNP r2 outcome, estimated variance explained in outcome; Correct causal direction, whether the assumption that exposure causes outcome is valid from MR Steiger test; Steiger P-value, P value of Steiger test; OR, Odds ratio; OR lci95, lower 95% confidence interval of OR; OR uci95, upper 95% confidence interval of OR; Q value, the result of Cochran’s Q test for assessing the heterogeneity; Q p value: P value of Cochran’s Q test. [file Table_4.xlsx]

## Sheet: Sheet2
Supplementary Table 4. MR results of circulating proteins to XP
Gene (Exposure)	N_SNP	Method	Beta	SE	P-value	P-value (FDR adjusted)	Egger Intercept	Egger Intercept P value	SNP r2 exposure	SNP r2 outcome	Correct causal direction	Steiger P-value	OR	OR lci95	OR uci95	Q value	Q p value
FN1	81	Inverse variance weighted	-1.85085	0.22852	5.52715e-16	5.14578e-13	-0.111334	0.718768	0.0977396	0.000190556	TRUE	0	0.157103	0.100384	0.24587	0.130607	1
NTM	35	Inverse variance weighted	-1.16253	0.164863	1.77057e-12	8.24202e-10	0.0952949	0.333545	0.116923	0.000205588	TRUE	0	0.312695	0.226353	0.431972	21.1912	0.957578
FCN2	38	Inverse variance weighted	0.915252	0.140189	6.63419e-11	2.05881e-08	0.0105728	0.876506	0.39609	0.000147766	TRUE	0	2.4974	1.89739	3.28715	8.34566	1
GSN	48	Inverse variance weighted	-0.57959	0.0949162	1.01943e-09	2.37272e-07	0.0885858	0.0118817	0.27493	0.000138478	TRUE	0	0.560128	0.465043	0.674655	10.4788	1
GOLM1	34	Inverse variance weighted	1.2867	0.216952	3.01401e-09	5.61208e-07	0.105025	0.322307	0.12056	0.000244843	TRUE	0	3.62083	2.36666	5.53964	40.8804	0.162876
FAM3B	20	Inverse variance weighted	-1.52952	0.287356	1.02224e-07	1.58617e-05	-0.654469	0.00478706	0.110623	0.00013359	TRUE	0	0.21664	0.123349	0.380488	17.7483	0.539303
ANXA7	32	Inverse variance weighted	1.26705	0.24695	2.88495e-07	3.83699e-05	0.750115	0.000843881	0.0682213	0.00011622	TRUE	0	3.55038	2.1881	5.7608	13.763	0.996808
DLK1	82	Inverse variance weighted	0.933616	0.184164	3.98924e-07	4.64247e-05	0.0737766	0.213445	0.180244	0.000611072	TRUE	0	2.54369	1.77297	3.64946	160.012	4.01823e-07
TNFRSF1B	16	Inverse variance weighted	1.22176	0.249198	9.45057e-07	9.77609e-05	0.474282		0.126751	7.26415e-05	TRUE	0	3.39314	2.082	5.52998	1.01965	1
CCL23	84	Inverse variance weighted	-0.534457	0.114666	3.14711e-06	0.000292996	0.232742	0.0014204	0.307695	0.000419848	TRUE	0	0.585987	0.468039	0.733659	114.778	0.0119816
ICAM5	133	Inverse variance weighted	-0.283407	0.0614643	4.00899e-06	0.000339306	-0.0559729	0.33882	0.781929	0.000305853	TRUE	0	0.753213	0.667726	0.849645	84.2386	0.9996
PDE5A	18	Inverse variance weighted	0.560768	0.131907	2.12597e-05	0.00160831	-0.0540757	0.705732	0.22755	5.60072e-05	TRUE	0	1.75202	1.35287	2.26892	1.24585	1
LRP11	55	Inverse variance weighted	-0.961569	0.226842	2.24576e-05	0.00160831	-0.517961	0.00244574	0.20426	0.000387276	TRUE	0	0.382293	0.245078	0.596331	100.232	0.000134829
PLG	18	Inverse variance weighted	0.893732	0.214569	3.11009e-05	0.00206821	-1.44978	0.0433573	0.040161	9.45214e-05	TRUE	1.66756e-260	2.44423	1.60509	3.72209	15.2543	0.577171
HP	130	Inverse variance weighted	0.232586	0.0597307	9.86391e-05	0.0059714	0.665802	0.00304957	1.44195	0.000728357	TRUE		1.26186	1.12245	1.41858	224.812	3.62503e-07
SIGLEC5	56	Inverse variance weighted	-0.16429	0.0422959	0.000102623	0.0059714	-0.199875	1.67052e-05	0.946012	0.000172241	TRUE	0	0.848496	0.780992	0.921834	44.3242	0.847951
SIGLEC7	3	Inverse variance weighted	-0.759899	0.206926	0.000240351	0.0131627	0.0895221		0.0525573	4.04842e-05	TRUE	0	0.467714	0.311775	0.701647	0.478548	0.787199
REG1B	13	Inverse variance weighted	0.99214	0.274661	0.000303563	0.0157009	-0.580958	0.0247473	0.0799213	7.37242e-05	TRUE	0	2.697	1.57429	4.62037	12.183	0.431101
C5	19	Inverse variance weighted	-1.38304	0.404435	0.000626907	0.0307185	-0.0630023	0.342363	0.0245626	3.95854e-05	TRUE	4.15398e-161	0.250814	0.113525	0.554132	1.96	0.999999
CLEC11A	49	Inverse variance weighted	0.842362	0.248671	0.000705435	0.032838	0.0948675	0.0660235	0.108204	8.27564e-05	TRUE	0	2.32184	1.42613	3.78012	17.0706	0.999989
REG1A	12	Inverse variance weighted	0.935824	0.294344	0.00147603	0.0654372	-0.736683	0.0185282	0.0832244	7.3463e-05	TRUE	0	2.54931	1.43177	4.53914	13.2053	0.28012
TGFBI	6	Inverse variance weighted	0.982071	0.321256	0.0022358	0.094615	0.212871	0.455404	0.0364848	3.99426e-05	TRUE	8.76712e-244	2.66998	1.42249	5.01149	4.43255	0.488959
CAPG	6	Inverse variance weighted	0.789308	0.276051	0.00424604	0.171872	0.0745022	0.623388	0.0403571	2.8899e-05	TRUE	1.22413e-273	2.20187	1.28178	3.78244	1.79282	0.877004
MCF2L	2	Inverse variance weighted	1.19701	0.435247	0.00595615	0.223896			0.0204064	2.34336e-05	TRUE	1.63656e-135	3.31021	1.41047	7.76865	0.519541	0.471038
IGFLR1	4	Inverse variance weighted	0.955272	0.347737	0.00601225	0.223896	0.219041	0.426894	0.0352789	2.57321e-05	TRUE	1.66291e-238	2.59938	1.31483	5.13888	1.32925	0.7222
GRAMD1C	36	Inverse variance weighted	-0.326316	0.120669	0.00684642	0.238105	0.0245052	0.891775	0.181795	0.000112891	TRUE	0	0.721577	0.569596	0.91411	31.6272	0.631719
TCN2	20	Inverse variance weighted	-0.435575	0.161242	0.0069053	0.238105	0.14995	0.301356	0.238883	7.22869e-05	TRUE	0	0.646893	0.471607	0.887328	17.637	0.546794
ESM1	2	Inverse variance weighted	-1.68424	0.661065	0.0108415	0.351848			0.00840312	1.88201e-05	TRUE	5.96823e-55	0.185586	0.0507966	0.678038	0.000660689	0.979494
FAS	33	Inverse variance weighted	0.248179	0.0977086	0.0110855	0.351848	0.178633	5.29696e-06	0.347333	0.00010962	TRUE	0	1.28169	1.05831	1.55222	31.3601	0.498775
PTPRU	3	Inverse variance weighted	-1.42942	0.564516	0.0113377	0.351848	-0.298135	0.362773	0.011132	3.37479e-05	TRUE	3.35442e-71	0.239448	0.0791929	0.723998	2.76782	0.250597
TMEM190	6	Inverse variance weighted	0.580769	0.232709	0.0125714	0.37408	0.00388919	0.974193	0.0624042	2.097e-05	TRUE	0	1.78741	1.13276	2.8204	1.0048	0.962178
LRIG3	5	Inverse variance weighted	0.69319	0.278839	0.0129194	0.37408	0.00346265	0.984516	0.0729	4.10909e-05	TRUE	0	2.00009	1.15797	3.45463	5.56918	0.233715
NEGR1	17	Inverse variance weighted	-0.458655	0.185186	0.0132596	0.37408	0.157996	0.402513	0.107652	2.04173e-05	TRUE	0	0.632133	0.439719	0.908746	0.908477	1
CFHR2	10	Inverse variance weighted	-0.444774	0.184693	0.0160324	0.439004	0.0238478	0.925126	0.117372	2.70256e-05	TRUE	0	0.640969	0.446296	0.920558	3.52273	0.939934
CHST9	2	Inverse variance weighted	-0.9616	0.407647	0.0183289	0.487549			0.0275934	1.62214e-05	TRUE	4.83681e-187	0.382281	0.171944	0.84992	0.0309364	0.860382
ATXN3	3	Inverse variance weighted	-0.901552	0.387703	0.0200524	0.518578	0.0843932	0.546791	0.027061	1.80499e-05	TRUE	7.99917e-183	0.405939	0.189863	0.867922	0.818761	0.664062
PKLR	2	Inverse variance weighted	1.58599	0.688471	0.0212426	0.53451			0.00784921	1.61679e-05	TRUE	1.25057e-51	4.88413	1.26692	18.8289	0.270089	0.603272
CLSTN1	4	Inverse variance weighted	1.23132	0.539514	0.0224726	0.550579	-0.148167	0.498754	0.0381437	1.80613e-05	TRUE	5.96427e-261	3.42576	1.18991	9.86281	1.02118	0.796128
PDGFD	64	Inverse variance weighted	-0.157768	0.0711232	0.0265391	0.625097	0.0410489	0.199415	0.618157	0.000152159	TRUE	0	0.854048	0.742918	0.981801	47.5642	0.925927
PSME2	3	Inverse variance weighted	-1.87563	0.848466	0.0270628	0.625097	0.124765	0.631363	0.00974943	1.55026e-05	TRUE	1.73724e-64	0.153259	0.0290533	0.808451	0.460588	0.7943
GLO1	2	Inverse variance weighted	1.95524	0.892556	0.02848	0.625097			0.00460927	1.40123e-05	TRUE	2.26853e-30	7.06562	1.22855	40.6358	0.0345552	0.852531
APOA4	3	Inverse variance weighted	-1.55961	0.712735	0.0286549	0.625097	0.146484	0.424584	0.00741034	1.8559e-05	TRUE	2.26785e-48	0.210219	0.0519971	0.849891	1.61341	0.446326
GSTM1	9	Inverse variance weighted	0.301797	0.13885	0.0297392	0.625097	-0.153053	0.301173	0.101021	3.49409e-05	TRUE	0	1.35229	1.03009	1.77525	7.328	0.501692
PPIL1	5	Inverse variance weighted	0.690719	0.317983	0.0298413	0.625097	0.039669	0.688998	0.0365258	2.14967e-05	TRUE	1.9188e-248	1.99515	1.0698	3.7209	2.69654	0.60982
CHI3L1	7	Inverse variance weighted	-0.452094	0.2086	0.0302141	0.625097	0.178281	0.247099	0.0560929	2.84862e-05	TRUE	0	0.636294	0.42276	0.957684	5.12882	0.527401
COL11A2	3	Inverse variance weighted	-1.57587	0.732779	0.0315126	0.637787	-0.393657	0.621443	0.00437089	1.61536e-05	TRUE	1.47657e-28	0.206828	0.0491875	0.869686	0.947168	0.622766
IL1RAP	10	Inverse variance weighted	0.43736	0.206095	0.0338273	0.654882	-0.111124	0.660671	0.0782037	4.78017e-05	TRUE	0	1.54861	1.03398	2.31939	10.9896	0.276425
ANXA2	67	Inverse variance weighted	-0.256653	0.12112	0.0340906	0.654882	-0.128484	0.135488	0.256547	0.000119744	TRUE	0	0.773636	0.610151	0.980926	36.8138	0.998633
CR2	4	Inverse variance weighted	1.06503	0.503995	0.0345857	0.654882	0.304404	0.282033	0.0194822	1.92128e-05	TRUE	4.9223e-130	2.90092	1.08026	7.79014	2.16163	0.539545
ST3GAL1	2	Inverse variance weighted	-0.783049	0.37175	0.0351709	0.654882			0.0273409	1.32941e-05	TRUE	3.90682e-186	0.45701	0.220539	0.947035	0.148751	0.699732
PGP	3	Inverse variance weighted	-0.84317	0.402967	0.0364024	0.664522	0.294837	0.851952	0.0144483	1.2867e-05	TRUE	6.5228e-97	0.430344	0.195346	0.948044	0.0601219	0.970386
NOTCH1	2	Inverse variance weighted	-1.78621	0.868945	0.0398207	0.669014			0.00524972	1.76256e-05	TRUE	3.53769e-34	0.167595	0.030521	0.920282	1.16347	0.280746
LECT2	8	Inverse variance weighted	0.476071	0.234464	0.0423095	0.669014	-0.218579	0.142373	0.068186	5.03141e-05	TRUE	0	1.60974	1.01666	2.54879	10.9223	0.142044
CA13	2	Inverse variance weighted	0.854073	0.420645	0.0423171	0.669014			0.0277733	1.25915e-05	TRUE	2.17296e-189	2.34919	1.03005	5.35771	0.22077	0.638454
EMILIN3	3	Inverse variance weighted	0.745594	0.369849	0.0438061	0.669014	-0.0510153	0.819667	0.0287418	1.70025e-05	TRUE	7.27601e-195	2.10769	1.02091	4.3514	1.80074	0.406419
GRHPR	3	Inverse variance weighted	0.721529	0.358204	0.0439781	0.669014	-0.161321	0.447227	0.0288693	1.64793e-05	TRUE	6.61181e-196	2.05758	1.01964	4.15207	1.62693	0.443319
MRC2	5	Inverse variance weighted	0.971616	0.482567	0.0440689	0.669014	-0.0323737	0.941369	0.0207824	1.43263e-05	TRUE	3.77487e-140	2.64221	1.02612	6.80356	0.887703	0.926318
COCH	3	Inverse variance weighted	-0.676915	0.336389	0.0441882	0.669014	0.143217	0.681908	0.0291751	1.70274e-05	TRUE	6.78018e-198	0.508182	0.262833	0.98256	1.82404	0.401711
ATRN	4	Inverse variance weighted	-0.37328	0.185505	0.0441945	0.669014	-0.0741664	0.758767	0.0442214	1.90625e-05	TRUE	4.40492e-304	0.688472	0.47861	0.990356	2.5262	0.470575
S100A7	6	Inverse variance weighted	-0.446834	0.223012	0.0451095	0.669014	0.391393	0.243148	0.0783724	2.59877e-05	TRUE	0	0.63965	0.413153	0.990317	4.94949	0.422075
IL1R2	7	Inverse variance weighted	0.67061	0.336234	0.0461004	0.669014	-0.148512	0.830143	0.0402177	3.62886e-05	TRUE	7.02057e-271	1.95543	1.01166	3.77964	7.52694	0.274848
BTN3A3	4	Inverse variance weighted	-0.52198	0.262293	0.0465837	0.669014	-0.23594	0.34436	0.0610075	1.80003e-05	TRUE	0	0.593344	0.354845	0.992145	2.24862	0.522436
IDUA	4	Inverse variance weighted	0.532991	0.268064	0.0467787	0.669014	-0.338782	0.499136	0.0414853	2.84454e-05	TRUE	8.89954e-282	1.70402	1.00761	2.88174	4.2333	0.237349
GSTM3	9	Inverse variance weighted	0.2928	0.148348	0.048411	0.669014	0.0611699	0.715233	0.0677357	3.29353e-05	TRUE	0	1.34017	1.00204	1.79241	7.46486	0.487405
CA6	9	Inverse variance weighted	-0.686522	0.347885	0.048448	0.669014	-0.352874	0.392449	0.0505658	4.55729e-05	TRUE	0	0.503323	0.25452	0.995343	10.5728	0.227097
MMP1	9	Inverse variance weighted	0.506283	0.257587	0.0493584	0.669014	-0.512748	0.173226	0.0623675	2.43723e-05	TRUE	0	1.65911	1.00141	2.74877	4.54372	0.805043
MTHFD1	2	Inverse variance weighted	-1.65493	0.843806	0.0498474	0.669014			0.0057912	1.12012e-05	TRUE	1.31362e-38	0.191105	0.0365604	0.998928	0.0171098	0.89593
KNG1	2	Inverse variance weighted	1.75685	0.901658	0.0513591	0.669014			0.00659567	1.71196e-05	TRUE	3.81875e-43	5.79417	0.989655	33.9233	1.23112	0.267189
NQO1	5	Inverse variance weighted	0.335487	0.172243	0.0514436	0.669014	-0.061267	0.819143	0.0424943	2.08122e-05	TRUE	3.86158e-291	1.39862	0.997894	1.96027	3.38507	0.495568
POGLUT1	3	Inverse variance weighted	-0.914315	0.469954	0.0517097	0.669014	-0.68938	0.53222	0.0194555	1.51176e-05	TRUE	8.77757e-131	0.400791	0.159546	1.00682	1.42946	0.489324
KLK13	5	Inverse variance weighted	-0.24776	0.127525	0.0520361	0.669014	-0.248569	0.473261	0.0808244	1.29051e-05	TRUE	0	0.780547	0.607921	1.00219	0.676792	0.95416
HABP4	3	Inverse variance weighted	-0.79957	0.41255	0.0526089	0.669014	-0.144627	0.563668	0.023958	1.28279e-05	TRUE	1.26904e-162	0.449522	0.200254	1.00907	0.668493	0.715877
PGLYRP2	3	Inverse variance weighted	-0.715798	0.37013	0.0531243	0.669014	-0.0704267	0.800552	0.0298564	2.13776e-05	TRUE	1.65501e-201	0.488802	0.236631	1.0097	2.56932	0.276744
BMPER	2	Inverse variance weighted	1.88395	0.974379	0.0531762	0.669014			0.00552793	1.13407e-05	TRUE	7.91401e-37	6.57943	0.974497	44.4218	0.173434	0.677077
RSPO3	17	Inverse variance weighted	-0.310597	0.164016	0.0582656	0.716045	0.0469712	0.817969	0.179982	1.06367e-05	TRUE	0	0.733009	0.531491	1.01093	0.0828868	1
ITIH5	6	Inverse variance weighted	0.446431	0.237244	0.0598719	0.716045	-0.255169	0.201989	0.057064	1.94322e-05	TRUE	0	1.56272	0.981604	2.48788	3.16185	0.67505
CLMP	2	Inverse variance weighted	-0.854694	0.455062	0.0603552	0.716045			0.01959	1.02683e-05	TRUE	5.21553e-133	0.425413	0.174363	1.03793	0.0142986	0.904818
RMDN1	4	Inverse variance weighted	-0.682137	0.363646	0.0606789	0.716045	0.181168	0.371245	0.0339484	1.43591e-05	TRUE	2.32292e-232	0.505536	0.247862	1.03108	1.43428	0.697519
APOC3	3	Inverse variance weighted	-1.36329	0.726995	0.06076	0.716045	1.75395		0.00844575	1.92085e-05	TRUE	3.51063e-55	0.255818	0.061532	1.06356	2.40212	0.300875
GSTO1	5	Inverse variance weighted	-0.321487	0.174619	0.0656107	0.741784	-0.151224	0.264335	0.0616717	1.85009e-05	TRUE	0	0.72507	0.514922	1.02098	2.99205	0.559157
QPCTL	5	Inverse variance weighted	0.724906	0.394778	0.0663229	0.741784	0.326657	0.679521	0.0313322	2.50046e-05	TRUE	6.01258e-211	2.06454	0.952315	4.47574	4.68003	0.321731
F2	17	Inverse variance weighted	0.410525	0.223719	0.0665056	0.741784	-0.0194378	0.937153	0.0768942	1.00257e-05	TRUE	0	1.50761	0.972423	2.33734	0.0909514	1
BCAM	4	Inverse variance weighted	0.518551	0.28339	0.0672782	0.741784	-0.016759	0.957277	0.0342343	1.47842e-05	TRUE	3.02799e-234	1.67959	0.963778	2.92705	1.75137	0.625574
B4GALT2	2	Inverse variance weighted	1.05766	0.580116	0.0682753	0.741784			0.0173901	1.57833e-05	TRUE	2.04457e-116	2.87962	0.9237	8.97718	1.25906	0.261829
LAP3	48	Inverse variance weighted	0.342927	0.188214	0.0684541	0.741784	-0.044753	0.785419	0.108036	1.07779e-05	TRUE	0	1.40907	0.974362	2.03771	0.397974	1
KLK12	3	Inverse variance weighted	-1.13511	0.623154	0.0685214	0.741784			0.00992466	9.61947e-06	TRUE	8.7757e-67	0.321385	0.0947516	1.0901	9.86076e-32	1
NID1	5	Inverse variance weighted	-0.902333	0.500268	0.0712786	0.756134	-0.0648194	0.599589	0.016292	1.45701e-05	TRUE	3.72626e-109	0.405622	0.152154	1.08133	1.77239	0.77753
RARRES1	4	Inverse variance weighted	0.365734	0.202907	0.0714713	0.756134	-0.0653121	0.678244	0.0591867	1.23603e-05	TRUE	0	1.44157	0.968542	2.14563	1.01459	0.797722
C1QTNF5	2	Inverse variance weighted	-0.760205	0.427054	0.0750576	0.785153			0.0159458	1.05533e-05	TRUE	9.42469e-108	0.467571	0.202456	1.07985	0.471418	0.492336
MYOC	4	Inverse variance weighted	0.516129	0.294992	0.0801809	0.820077	-0.0567282	0.785808	0.0328632	9.90979e-06	TRUE	2.84274e-226	1.67553	0.939831	2.98713	0.356974	0.94898
FGF2	6	Inverse variance weighted	-0.498349	0.286171	0.0816073	0.820077	0.359619	0.302449	0.0430195	2.12662e-05	TRUE	9.27913e-295	0.607533	0.346718	1.06454	4.30282	0.50669
CCL16	13	Inverse variance weighted	0.224109	0.128965	0.082255	0.820077	-0.172074	0.381745	0.201895	7.3082e-05	TRUE	0	1.25121	0.971744	1.61104	20.1403	0.0644773
NMB	2	Inverse variance weighted	-1.20051	0.692459	0.0829722	0.820077			0.00935759	8.79727e-06	TRUE	4.15575e-63	0.30104	0.0774801	1.16965	0.0287832	0.86528
FCRL4	8	Inverse variance weighted	-0.557611	0.323016	0.0843005	0.820077	0.0378123	0.864474	0.0565516	4.54756e-05	TRUE	0	0.572576	0.304001	1.07842	11.0023	0.138518
SIRPA	7	Inverse variance weighted	-0.330148	0.191363	0.0844834	0.820077	0.0853437	0.428913	0.0635568	1.55944e-05	TRUE	0	0.718817	0.494	1.04595	2.40261	0.879204
CRELD1	6	Inverse variance weighted	-0.406431	0.235814	0.084794	0.820077	-0.0414249	0.789767	0.0677237	1.46171e-05	TRUE	0	0.666023	0.419527	1.05735	2.07143	0.839175
MMP2	2	Inverse variance weighted	1.60094	0.935397	0.0869872	0.820077			0.00498692	8.85994e-06	TRUE	1.37811e-33	4.95769	0.792599	31.0103	0.126838	0.721733
ZFAND1	2	Inverse variance weighted	-0.962579	0.56261	0.0870965	0.820077			0.0109488	9.80888e-06	TRUE	1.03632e-73	0.381907	0.126781	1.15043	0.456231	0.499391
F13B	3	Inverse variance weighted	-1.19717	0.70184	0.0880527	0.820077	3.20278		0.0106287	1.76957e-05	TRUE	4.78463e-70	0.302047	0.0763232	1.19535	2.48648	0.288449
TNC	7	Inverse variance weighted	0.394266	0.231573	0.0886508	0.820077	0.262147	0.365877	0.0667044	2.79867e-05	TRUE	0	1.4833	0.942126	2.33532	6.50897	0.368649
REN	4	Inverse variance weighted	-1.27079	0.748476	0.0895379	0.820077	-0.103126	0.55484	0.00882579	1.13977e-05	TRUE	5.59408e-59	0.280609	0.0647121	1.21679	1.04881	0.789445
VNN2	7	Inverse variance weighted	0.30415	0.179312	0.0898474	0.820077	-0.455076	0.308702	0.0751461	2.40578e-05	TRUE	0	1.35547	0.953799	1.9263	5.42126	0.491025
NT5C	3	Inverse variance weighted	0.770709	0.458422	0.0927201	0.838081	0.0917931	0.567335	0.0294121	1.09241e-05	TRUE	1.76127e-201	2.1613	0.880031	5.308	0.941598	0.624503
CEL	4	Inverse variance weighted	0.830301	0.497993	0.0954559	0.854514	-0.212754	0.308755	0.0376232	1.53174e-05	TRUE	3.84715e-258	2.29401	0.86436	6.0883	2.50361	0.47464
SIGLEC12	6	Inverse variance weighted	0.293763	0.177647	0.0982032	0.869379	-0.0675966	0.411903	0.0417243	2.15504e-05	TRUE	2.0799e-285	1.34147	0.947028	1.90019	4.69899	0.453709
SPINT1	2	Inverse variance weighted	1.17027	0.711498	0.10001	0.869379			0.0134183	9.89901e-06	TRUE	1.45568e-90	3.22288	0.799106	12.9982	0.709138	0.39973
ROBO1	4	Inverse variance weighted	0.887656	0.541272	0.101017	0.869379	-0.801273	0.610059	0.0197913	2.79019e-05	TRUE	1.84881e-130	2.42943	0.840938	7.01849	5.07489	0.166395
IL17RA	9	Inverse variance weighted	0.258556	0.158258	0.102308	0.869379	-0.153473	0.378145	0.075058	3.03851e-05	TRUE	0	1.29506	0.949681	1.76604	7.81164	0.452083
TAPBPL	6	Inverse variance weighted	-0.288204	0.176557	0.102604	0.869379	-0.0466579	0.759181	0.0748842	2.86579e-05	TRUE	0	0.749608	0.53033	1.05955	6.44852	0.264988
SFRP4	2	Inverse variance weighted	-0.75144	0.460495	0.102719	0.869379			0.0171034	9.62365e-06	TRUE	5.46881e-116	0.471687	0.191281	1.16315	0.656708	0.417725
RTP4	4	Inverse variance weighted	-0.549823	0.338474	0.104287	0.872854	-0.119955	0.76435	0.0300027	1.64198e-05	TRUE	7.0387e-204	0.577052	0.297235	1.12029	3.0133	0.389578
FLRT2	2	Inverse variance weighted	0.582093	0.359082	0.105005	0.872854			0.031952	8.58016e-06	TRUE	2.39166e-220	1.78978	0.885407	3.6179	0.331781	0.564612
INHBB	3	Inverse variance weighted	-0.535801	0.333686	0.108339	0.876426	0.124422	0.59136	0.0299167	9.18483e-06	TRUE	1.08691e-205	0.5852	0.304274	1.1255	0.589862	0.744583
NPTX1	6	Inverse variance weighted	0.530981	0.330936	0.108608	0.876426	-0.252799	0.389204	0.0392732	1.75733e-05	TRUE	3.74348e-269	1.7006	0.889004	3.25312	3.48728	0.625313
ADAMTSL2	2	Inverse variance weighted	2.03557	1.27341	0.109928	0.876426			0.00219188	9.15726e-06	TRUE	5.63088e-15	7.6566	0.631084	92.8934	0.603422	0.437276
PSAP	4	Inverse variance weighted	0.51357	0.321976	0.1107	0.876426	-0.0325886	0.839097	0.0337791	1.34786e-05	TRUE	1.85573e-231	1.67125	0.889138	3.14132	2.10506	0.550891
CCL17	2	Inverse variance weighted	-0.821127	0.515602	0.111259	0.876426			0.0188543	7.55221e-06	TRUE	9.17639e-129	0.439936	0.16014	1.20859	0.0687911	0.793105
MDGA1	10	Inverse variance weighted	0.248178	0.15618	0.112049	0.876426	0.294412	0.281755	0.0943794	2.489e-05	TRUE	0	1.28169	0.943712	1.74071	6.06033	0.733865
CA8	4	Inverse variance weighted	-0.462777	0.292925	0.114142	0.876426	-0.281824	0.237096	0.0334992	2.22763e-05	TRUE	7.44314e-227	0.629533	0.354548	1.11779	4.19431	0.241232
ENTPD1	2	Inverse variance weighted	-1.05635	0.668931	0.114298	0.876426			0.010317	8.52121e-06	TRUE	1.06029e-69	0.347722	0.0937186	1.29014	0.445508	0.504476
HAPLN1	2	Inverse variance weighted	-1.19506	0.758767	0.115255	0.876426			0.00647084	7.3891e-06	TRUE	7.78139e-44	0.302686	0.0684095	1.33927	0.0681238	0.794088
SPON1	4	Inverse variance weighted	-0.511075	0.324547	0.115318	0.876426	0.391494	0.369658	0.0336879	1.30873e-05	TRUE	6.01912e-231	0.599851	0.317529	1.13319	2.03448	0.565281
TEK	3	Inverse variance weighted	0.983378	0.627494	0.117079	0.876426	0.393038	0.591409	0.0167608	1.12636e-05	TRUE	3.53667e-113	2.67347	0.781524	9.14553	1.42926	0.489373
GP1BA	4	Inverse variance weighted	0.804796	0.515513	0.118487	0.876426	0.29781	0.586721	0.0134323	1.06323e-05	TRUE	1.76472e-90	2.23624	0.814151	6.14232	1.23024	0.745761
GDF15	4	Inverse variance weighted	-0.500045	0.320532	0.118749	0.876426	0.022424	0.860242	0.0364258	1.25606e-05	TRUE	1.37253e-250	0.606504	0.323587	1.13678	1.89886	0.593661
MRC1	8	Inverse variance weighted	0.573177	0.367438	0.118776	0.876426	-0.636373	0.26037	0.0329345	2.893e-05	TRUE	2.95769e-221	1.77389	0.863293	3.645	7.40488	0.387974
ITPA	8	Inverse variance weighted	-0.303353	0.19512	0.120017	0.876426	0.039709	0.792463	0.0810316	3.13549e-05	TRUE	0	0.738338	0.503693	1.08229	8.03937	0.329135
CD14	17	Inverse variance weighted	-0.186897	0.120369	0.120497	0.876426	0.148736	0.402021	0.274259	1.39731e-05	TRUE	0	0.82953	0.655196	1.05025	2.40896	0.999962
TXNDC5	3	Inverse variance weighted	-0.837888	0.542953	0.122781	0.880909	0.175113	0.749782	0.0168122	7.73049e-06	TRUE	1.51862e-114	0.432623	0.149258	1.25395	0.285035	0.867172
PDHX	2	Inverse variance weighted	1.35185	0.878693	0.123932	0.880909			0.00725638	8.61402e-06	TRUE	6.64942e-49	3.86457	0.690466	21.6302	0.604369	0.436916
FCER2	3	Inverse variance weighted	-0.527626	0.343122	0.124117	0.880909	0.130675	0.745998	0.0303291	8.91432e-06	TRUE	1.03032e-208	0.590004	0.30115	1.15592	0.710266	0.70108
DAPP1	2	Inverse variance weighted	-1.49447	0.973892	0.124898	0.880909			0.00390767	6.86147e-06	TRUE	1.12984e-26	0.224367	0.0332633	1.5134	0.0119475	0.912961
LEFTY2	4	Inverse variance weighted	-0.393884	0.258424	0.127465	0.884509	0.0584926	0.768569	0.0616756	1.42965e-05	TRUE	0	0.674433	0.406409	1.11922	2.60825	0.456045
LHB	3	Inverse variance weighted	0.447906	0.295182	0.129169	0.884509	-0.43958	0.474479	0.0300551	1.08848e-05	TRUE	4.96081e-206	1.56503	0.877524	2.79118	1.45204	0.48383
ACAN	2	Inverse variance weighted	-1.39313	0.918628	0.129385	0.884509			0.00713191	1.10966e-05	TRUE	1.29299e-47	0.248297	0.0410223	1.50288	1.15993	0.281479
PRDX1	2	Inverse variance weighted	-1.04617	0.691227	0.130152	0.884509			0.00629893	1.52571e-05	TRUE	2.03566e-41	0.351279	0.0906292	1.36156	1.59929	0.206004
COL1A1	4	Inverse variance weighted	-1.04828	0.693612	0.130705	0.884509	-0.223374	0.325567	0.0105843	3.43338e-05	TRUE	1.6852e-67	0.350542	0.0900172	1.36507	6.72371	0.0812453
GSTM4	10	Inverse variance weighted	0.27371	0.181296	0.131109	0.884509	-0.12211	0.669887	0.0972423	6.1895e-05	TRUE	0	1.31483	0.921613	1.87583	17.0354	0.0481637
UBLCP1	3	Inverse variance weighted	-1.05044	0.699794	0.133337	0.887104	-0.971903	0.562168	0.0222331	2.95414e-05	TRUE	6.9608e-147	0.349784	0.0887407	1.37872	4.79165	0.0910976
RNPEP	5	Inverse variance weighted	0.81534	0.543366	0.133475	0.887104	0.088448	0.794366	0.0324771	4.83166e-05	TRUE	3.15777e-214	2.25994	0.779068	6.55571	10.6636	0.0306169
IVD	2	Inverse variance weighted	1.05149	0.702327	0.134352	0.887104			0.00760207	7.24297e-06	TRUE	1.58343e-51	2.86193	0.72248	11.3368	0.256869	0.61228
KLK11	5	Inverse variance weighted	0.16733	0.112752	0.137794	0.901546	-0.110251	0.332642	0.0448258	1.08531e-05	TRUE	0	1.18214	0.947751	1.47451	1.54121	0.819318
CCL25	7	Inverse variance weighted	-0.365319	0.246589	0.138476	0.901546	0.0499095	0.851005	0.051463	1.30174e-05	TRUE	0	0.693975	0.427999	1.12524	2.29531	0.890635
SERPINA12	6	Inverse variance weighted	0.419067	0.285525	0.142184	0.91279	-0.105175	0.215054	0.040377	1.55401e-05	TRUE	1.01104e-277	1.52054	0.86887	2.66098	3.20618	0.668234
TIRAP	2	Inverse variance weighted	-0.649398	0.443095	0.142759	0.91279			0.0102834	7.72815e-06	TRUE	1.15896e-69	0.52236	0.219179	1.24492	0.517746	0.471805
CFH	3	Inverse variance weighted	2.21842	1.52037	0.144527	0.91279	2.88617	0.419112	0.00358982	3.64703e-05	TRUE	6.82893e-22	9.19283	0.466968	180.972	6.09334	0.0475168
HEBP1	6	Inverse variance weighted	0.460645	0.316007	0.144921	0.91279	0.0948786	0.758725	0.0356396	1.72121e-05	TRUE	1.98484e-243	1.5851	0.853229	2.94473	3.81213	0.576769
ABO	12	Inverse variance weighted	-0.456213	0.313109	0.145105	0.91279	0.180483	0.556318	0.0645023	2.84495e-05	TRUE	0	0.633679	0.34304	1.17056	7.6903	0.740748
GCLM	2	Inverse variance weighted	1.29839	0.893658	0.146254	0.913271			0.00493051	6.87931e-06	TRUE	1.53191e-33	3.66339	0.635603	21.1145	0.261998	0.608751
CTSB	6	Inverse variance weighted	0.365931	0.252602	0.147436	0.913271	-0.158423	0.29511	0.0612701	1.78976e-05	TRUE	0	1.44186	0.878826	2.3656	4.07493	0.538679
CXCL1	10	Inverse variance weighted	0.258876	0.179166	0.148488	0.913271	0.283009	0.320579	0.0663127	2.89371e-05	TRUE	0	1.29547	0.911841	1.84051	7.89367	0.544896
PCSK7	13	Inverse variance weighted	-0.269411	0.186741	0.149105	0.913271	0.364821	0.250903	0.124445	5.77247e-05	TRUE	0	0.763829	0.529711	1.10142	16.9681	0.150801
SERPINE2	5	Inverse variance weighted	-0.39068	0.271695	0.150452	0.915498	-0.0189527	0.906429	0.0392896	6.94144e-06	TRUE	1.61784e-273	0.676596	0.397245	1.1524	0.326669	0.988028
CD300A	7	Inverse variance weighted	0.415034	0.290077	0.152496	0.921906	-0.279946	0.908379	0.050778	2.99592e-05	TRUE	0	1.51442	0.857686	2.67403	7.70512	0.260513
SERPING1	4	Inverse variance weighted	-0.38846	0.272446	0.153919	0.922142	-0.245071	0.614648	0.0354167	1.52148e-05	TRUE	1.73279e-242	0.6781	0.397542	1.15666	3.12823	0.372274
ATP1B2	5	Inverse variance weighted	0.390652	0.275774	0.15661	0.922142	0.157371	0.44184	0.0599195	2.26302e-05	TRUE	0	1.47794	0.860824	2.53748	5.19819	0.267559
CNDP1	4	Inverse variance weighted	-0.388332	0.274576	0.157274	0.922142	-0.203619	0.432744	0.042592	1.28692e-05	TRUE	1.33104e-294	0.678187	0.395937	1.16164	2.43879	0.486454
PRKCA	2	Inverse variance weighted	1.50994	1.06814	0.157476	0.922142			0.00330162	6.36661e-06	TRUE	1.08475e-22	4.52645	0.557874	36.7264	0.197766	0.65653
S100A16	4	Inverse variance weighted	-0.641911	0.454105	0.157487	0.922142	-0.790269	0.387991	0.0199147	1.44212e-05	TRUE	3.98878e-134	0.526286	0.216112	1.28163	2.97613	0.395319
DCLK1	2	Inverse variance weighted	0.708134	0.504983	0.160828	0.932216			0.014943	5.7038e-06	TRUE	2.75991e-102	2.0302	0.75455	5.46247	0.00103853	0.974292
LAMC2	6	Inverse variance weighted	-0.42031	0.300005	0.16121	0.932216	-0.666652	0.361284	0.0433543	1.7241e-05	TRUE	1.80859e-298	0.656843	0.364831	1.18258	3.98418	0.551696
MAN1C1	2	Inverse variance weighted	0.670786	0.48179	0.163838	0.938471			0.0160761	5.633e-06	TRUE	3.70311e-110	1.95577	0.760696	5.02836	0.00456031	0.94616
PLXNB2	5	Inverse variance weighted	-0.38731	0.278495	0.164308	0.938471	-0.0907588	0.427976	0.0376188	1.3541e-05	TRUE	9.85736e-259	0.678881	0.393309	1.1718	2.73662	0.602822
TFF3	3	Inverse variance weighted	1.17357	0.847393	0.166078	0.942233	-0.746293	0.616147	0.00590192	8.18655e-06	TRUE	7.5878e-40	3.23351	0.614269	17.0212	0.905834	0.635771
PCSK1	5	Inverse variance weighted	-0.39515	0.286984	0.168541	0.942233	0.0950637	0.731988	0.0490715	9.63342e-06	TRUE	0	0.673579	0.383798	1.18215	1.42701	0.839487
AP1G2	3	Inverse variance weighted	0.536336	0.390785	0.169921	0.942233	0.0050842	0.986889	0.0146897	5.60322e-06	TRUE	1.43704e-100	1.70973	0.79485	3.67765	0.0490893	0.975754
ST6GALNAC6	2	Inverse variance weighted	2.57764	1.88638	0.171799	0.942233			0.00338391	1.35235e-05	TRUE	2.35225e-22	13.1661	0.326387	531.103	1.62696	0.202125
KYNU	3	Inverse variance weighted	-0.505217	0.370704	0.172927	0.942233	-0.0223758	0.865835	0.0308918	9.14018e-06	TRUE	1.32269e-212	0.603375	0.291768	1.24778	1.29538	0.523253
SEMA4D	6	Inverse variance weighted	0.411808	0.302449	0.173332	0.942233	-0.151185	0.364603	0.0668974	3.38229e-05	TRUE	0	1.50954	0.834441	2.73084	8.51108	0.130228
B4GALT7	5	Inverse variance weighted	0.495551	0.364823	0.174358	0.942233	-0.269009	0.584783	0.05391	8.7662e-06	TRUE	0	1.6414	0.802919	3.35551	1.17869	0.881595
CLSTN2	7	Inverse variance weighted	0.52155	0.384676	0.175158	0.942233	-0.0117215	0.951519	0.0335397	2.24744e-05	TRUE	4.35184e-227	1.68464	0.792617	3.58054	5.91398	0.432895
ARG1	2	Inverse variance weighted	-1.78696	1.32183	0.176412	0.942233			0.00472757	1.57707e-05	TRUE	6.01978e-31	0.167468	0.0125537	2.23406	1.92383	0.165435
UNC5B	3	Inverse variance weighted	0.873757	0.64849	0.177861	0.942233	-0.0101394	0.962435	0.00842466	8.73098e-06	TRUE	8.66509e-57	2.3959	0.672143	8.54032	1.19622	0.549851
AIF1L	3	Inverse variance weighted	0.458767	0.34062	0.178026	0.942233	-0.0932057	0.611033	0.0301749	7.73519e-06	TRUE	4.13416e-208	1.58212	0.811519	3.08448	0.854084	0.652436
WFIKKN2	5	Inverse variance weighted	0.329912	0.245909	0.179725	0.942233	-0.0184194	0.974449	0.0422024	1.66399e-05	TRUE	2.06502e-290	1.39085	0.858929	2.25217	3.93978	0.414217
MANBA	3	Inverse variance weighted	-0.432335	0.322409	0.179936	0.942233	0.113784	0.571598	0.0425471	1.36076e-05	TRUE	5.4352e-294	0.648992	0.344984	1.2209	2.47158	0.290605
CA1	2	Inverse variance weighted	1.01315	0.756523	0.180499	0.942233			0.0107173	6.80257e-06	TRUE	7.23824e-73	2.75426	0.625231	12.1331	0.552938	0.45712
MMP8	3	Inverse variance weighted	0.575537	0.430811	0.18157	0.942233	0.103848	0.670308	0.0243902	6.72046e-06	TRUE	9.52692e-168	1.77808	0.764256	4.13681	0.533379	0.765911
PROK2	4	Inverse variance weighted	0.286463	0.214535	0.181786	0.942233	-0.11279	0.436168	0.037179	8.37026e-06	TRUE	1.10544e-257	1.33171	0.874568	2.0278	1.10422	0.776056
RAB31	3	Inverse variance weighted	0.938969	0.706982	0.184133	0.942233	-0.0661863	0.886246	0.00776267	1.02681e-05	TRUE	5.21048e-52	2.55734	0.639726	10.2231	1.7779	0.411086
CCL5	2	Inverse variance weighted	-0.653475	0.492173	0.184266	0.942233			0.0170962	7.78745e-06	TRUE	1.71346e-116	0.520235	0.198268	1.36504	0.92327	0.336618
PMVK	2	Inverse variance weighted	2.1461	1.61842	0.184824	0.942233			0.0055345	1.76777e-05	TRUE	4.74945e-36	8.55148	0.358438	204.018	2.21061	0.137065
BPIFB1	3	Inverse variance weighted	-0.401072	0.302934	0.185517	0.942233	-0.263514	0.473458	0.0578422	8.55031e-06	TRUE	0	0.669602	0.369789	1.21249	1.19643	0.549792
AHSG	4	Inverse variance weighted	-0.496316	0.376592	0.187532	0.942233	0.163113	0.301679	0.0258003	1.26563e-05	TRUE	1.53071e-175	0.608769	0.290999	1.27355	2.62872	0.452477
PTGR1	4	Inverse variance weighted	-0.269795	0.20497	0.188085	0.942233	-0.211373	0.40351	0.0609695	1.20832e-05	TRUE	0	0.763536	0.510923	1.14105	2.43536	0.487086
SHBG	3	Inverse variance weighted	-0.50052	0.382453	0.190632	0.942233	0.151259	0.608369	0.0271705	6.41306e-06	TRUE	1.883e-187	0.606215	0.286468	1.28285	0.49935	0.779054
GBP1	2	Inverse variance weighted	-1.08397	0.828806	0.190916	0.942233			0.0123016	7.49173e-06	TRUE	1.55411e-83	0.338248	0.066641	1.71684	0.873638	0.34995
IL15RA	6	Inverse variance weighted	0.313929	0.241161	0.193005	0.942233	0.162281	0.222309	0.051174	1.92338e-05	TRUE	0	1.36879	0.853212	2.19593	4.93985	0.423265
GNPDA1	2	Inverse variance weighted	0.888624	0.682803	0.193109	0.942233			0.00900673	7.46941e-06	TRUE	5.06132e-61	2.43178	0.637839	9.27125	0.882737	0.347453
F5	4	Inverse variance weighted	1.44195	1.11007	0.193954	0.942233	-0.199974	0.347891	0.00586734	2.02023e-05	TRUE	5.88299e-38	4.22892	0.480087	37.2511	4.45999	0.215887
TNXB	3	Inverse variance weighted	0.464772	0.35909	0.195559	0.942233	-0.11372	0.486946	0.0182585	8.50097e-06	TRUE	2.55885e-124	1.59165	0.787381	3.21745	1.25703	0.533382
LCP1	2	Inverse variance weighted	0.653541	0.505121	0.195724	0.942233			0.00839301	6.00984e-06	TRUE	3.39353e-57	1.92233	0.714269	5.17364	0.398999	0.527607
CCL15	7	Inverse variance weighted	0.222961	0.172649	0.196562	0.942233	-0.331402	0.21419	0.0830496	2.07681e-05	TRUE	0	1.24977	0.890981	1.75304	5.49588	0.481954
CD36	2	Inverse variance weighted	0.695715	0.539191	0.196948	0.942233			0.0133445	5.35947e-06	TRUE	2.32474e-91	2.00514	0.69691	5.76917	0.183805	0.668124
MFGE8	3	Inverse variance weighted	0.594285	0.460997	0.197353	0.942233	-0.400702	0.721086	0.0258228	1.38074e-05	TRUE	2.36641e-175	1.81174	0.733983	4.47202	2.60122	0.272366
FRZB	6	Inverse variance weighted	-0.410792	0.32051	0.199954	0.949783	-0.299088	0.552081	0.0417482	1.94914e-05	TRUE	3.24301e-286	0.663125	0.353811	1.24285	5.06063	0.408525
MET	2	Inverse variance weighted	-0.912874	0.714387	0.201305	0.951344			0.00843081	7.03819e-06	TRUE	3.33259e-57	0.401369	0.0989568	1.62795	0.794821	0.372646
PMM2	3	Inverse variance weighted	-0.912812	0.718856	0.204152	0.959276	0.049089	0.921635	0.0104856	1.37925e-05	TRUE	9.33144e-70	0.401394	0.0980998	1.64238	2.63398	0.267941
GPX7	5	Inverse variance weighted	-0.316267	0.249675	0.205258	0.959276	-0.218259	0.576287	0.0341845	1.36913e-05	TRUE	2.9371e-234	0.728865	0.446806	1.18898	3.11806	0.538267
GPC5	5	Inverse variance weighted	-0.323652	0.256147	0.206395	0.959276	-0.151638	0.235257	0.0482862	1.43013e-05	TRUE	0	0.723502	0.437928	1.1953	3.33645	0.503178
KIR2DL4	2	Inverse variance weighted	-0.698685	0.553823	0.207105	0.959276			0.0156707	4.67507e-06	TRUE	1.03996e-107	0.497239	0.167935	1.47227	0.0210326	0.88469
DPP7	4	Inverse variance weighted	-0.378601	0.301906	0.209828	0.967079	-0.0212088	0.912553	0.0361255	4.82989e-06	TRUE	5.64827e-252	0.684819	0.378956	1.23755	0.0933808	0.99262
HNRNPAB	3	Inverse variance weighted	-1.18327	0.951076	0.213448	0.975975	-0.945301	0.465416	0.0040312	8.72012e-06	TRUE	3.21337e-27	0.306274	0.047483	1.97553	1.46001	0.481905
ADAMTS5	3	Inverse variance weighted	-0.298784	0.240367	0.213855	0.975975	-0.0407081	0.797188	0.0297285	7.07866e-06	TRUE	3.09059e-205	0.741719	0.463058	1.18808	0.896524	0.638737
NPNT	2	Inverse variance weighted	0.666558	0.54207	0.218827	0.977779			0.0138982	4.8397e-06	TRUE	2.28069e-95	1.94752	0.673074	5.63511	0.157336	0.691622
NTNG1	7	Inverse variance weighted	-0.336349	0.275242	0.221703	0.977779	0.349085	0.0374526	0.0718423	3.57906e-05	TRUE	0	0.714374	0.416519	1.22523	9.88516	0.129572
SDSL	5	Inverse variance weighted	-0.44296	0.363555	0.223068	0.977779	0.353179	0.34781	0.0331185	2.22484e-05	TRUE	3.50692e-224	0.642133	0.314891	1.30945	5.597	0.231334
LILRA5	43	Inverse variance weighted	-0.088442	0.0726998	0.22378	0.977779	0.0321659	0.708681	0.504949	1.24001e-05	TRUE	0	0.915356	0.793792	1.05554	2.79725	1
S100A4	2	Inverse variance weighted	-1.16684	0.963386	0.225825	0.977779			0.00463499	6.2922e-06	TRUE	1.17208e-31	0.31135	0.0471192	2.05731	0.703427	0.401635
MMP7	3	Inverse variance weighted	0.956093	0.790359	0.226396	0.977779	0.447478	0.614237	0.00689439	1.59181e-05	TRUE	2.71885e-45	2.60151	0.552661	12.246	3.17073	0.204873
NOG	3	Inverse variance weighted	-0.410416	0.339862	0.227202	0.977779	-0.205465	0.669207	0.0284489	5.3554e-06	TRUE	5.46679e-197	0.663374	0.340771	1.29138	0.388966	0.82326
TIMP4	4	Inverse variance weighted	0.39202	0.324968	0.227688	0.977779	0.0792663	0.807366	0.0323398	8.11778e-06	TRUE	2.6861e-223	1.47997	0.78277	2.79815	1.34485	0.718513
ACP6	5	Inverse variance weighted	-0.195951	0.163147	0.229723	0.977779	0.132937	0.72972	0.0673666	6.04319e-06	TRUE	0	0.822052	0.597071	1.13181	0.641928	0.958293
SYK	2	Inverse variance weighted	-1.35144	1.12778	0.230793	0.977779			0.00421722	4.17242e-06	TRUE	2.97717e-29	0.258868	0.0283854	2.36082	0.00325738	0.954487
IL1RL1	9	Inverse variance weighted	-0.328632	0.274608	0.23141	0.977779	0.56992	0.0620475	0.101088	3.95761e-05	TRUE	0	0.719908	0.420268	1.23318	11.5784	0.171029
CCL7	8	Inverse variance weighted	0.292546	0.245256	0.23294	0.977779	0.0649043	0.561277	0.0603608	1.46814e-05	TRUE	0	1.33983	0.828486	2.16679	3.64129	0.820042
TFF1	2	Inverse variance weighted	0.414525	0.347728	0.233223	0.977779			0.027371	4.13157e-06	TRUE	5.28116e-190	1.51365	0.765657	2.99239	0.00402432	0.949418
FBLN1	3	Inverse variance weighted	-0.669325	0.562557	0.234128	0.977779	0.0201759	0.921971	0.0119416	4.87693e-06	TRUE	7.50505e-82	0.512054	0.170003	1.54232	0.266605	0.8752
CNTN2	5	Inverse variance weighted	-0.540401	0.454899	0.23485	0.977779	0.214878	0.385039	0.0498118	3.98843e-05	TRUE	0	0.582514	0.23883	1.42077	10.1695	0.0376671
MATN4	4	Inverse variance weighted	0.443966	0.376513	0.238338	0.977779	0.0755757	0.622273	0.0244487	8.99984e-06	TRUE	2.7561e-167	1.55888	0.745276	3.26067	1.71396	0.633836
A4GALT	3	Inverse variance weighted	0.537334	0.461666	0.244464	0.977779	0.242204	0.53243	0.0305339	1.5751e-05	TRUE	8.20477e-208	1.71144	0.692441	4.22999	3.23912	0.197986
BRSK2	2	Inverse variance weighted	0.631384	0.545766	0.247322	0.977779			0.0099575	4.67327e-06	TRUE	2.82963e-68	1.88021	0.645121	5.47989	0.273609	0.600921
PSG9	3	Inverse variance weighted	-0.772228	0.671663	0.250257	0.977779	0.411217		0.0107662	6.85548e-06	TRUE	3.46007e-73	0.461982	0.12385	1.72328	1.04281	0.593685
SLITRK5	4	Inverse variance weighted	-0.660927	0.578238	0.253038	0.977779	0.169346	0.833247	0.0117199	5.61771e-06	TRUE	4.36703e-80	0.516372	0.166248	1.60387	0.631291	0.889233
MBL2	5	Inverse variance weighted	-0.240802	0.211136	0.254076	0.977779	0.0867935	0.559405	0.0620495	8.31642e-06	TRUE	0	0.785997	0.519635	1.1889	1.56787	0.814555
KREMEN1	2	Inverse variance weighted	-0.482599	0.423769	0.254776	0.977779			0.014988	3.80576e-06	TRUE	2.50171e-103	0.617177	0.268961	1.41622	0.0158254	0.899891
FGL1	5	Inverse variance weighted	0.321557	0.282555	0.255106	0.977779	0.0195095	0.889727	0.0480424	1.4217e-05	TRUE	0	1.37927	0.792748	2.39975	3.60882	0.461526
MTHFD2	2	Inverse variance weighted	-0.721401	0.635957	0.256646	0.977779			0.00411154	5.24769e-06	TRUE	2.53286e-28	0.486071	0.139753	1.69059	0.523352	0.469415
TPP1	3	Inverse variance weighted	0.56143	0.49547	0.257161	0.977779	-0.185969	0.605121	0.0120259	8.27607e-06	TRUE	1.9464e-81	1.75318	0.663855	4.62998	1.57073	0.455952
CPA4	8	Inverse variance weighted	-0.137072	0.121156	0.257899	0.977779	-0.233198	0.248663	0.0741188	3.39123e-05	TRUE	0	0.871907	0.687607	1.10561	9.88923	0.194938
ENPP5	6	Inverse variance weighted	0.147482	0.130814	0.259565	0.977779	-0.177675	0.328786	0.0527293	1.64508e-05	TRUE	0	1.15891	0.896809	1.49762	4.40335	0.492918
TESC	5	Inverse variance weighted	0.343442	0.307078	0.263388	0.977779	0.00278378	0.976975	0.0439311	8.99068e-06	TRUE	6.03844e-306	1.40979	0.772262	2.57363	1.85033	0.763262
FJX1	3	Inverse variance weighted	0.465381	0.418048	0.265612	0.977779	0.165088	0.609823	0.0223053	5.02782e-06	TRUE	7.53349e-154	1.59262	0.70188	3.61378	0.495001	0.78075
SIGLEC9	9	Inverse variance weighted	-0.203829	0.183157	0.265768	0.977779	0.00226121	0.98168	0.0598399	2.27363e-05	TRUE	0	0.815602	0.569602	1.16784	6.60405	0.579891
AMY2A	6	Inverse variance weighted	0.363896	0.327644	0.266722	0.977779	-0.393527	0.564804	0.0348047	1.66571e-05	TRUE	1.09941e-237	1.43892	0.757079	2.73486	4.51209	0.478267
FSTL4	2	Inverse variance weighted	-1.46611	1.32201	0.26743	0.977779			0.00240982	3.70062e-06	TRUE	3.94756e-17	0.230822	0.0172966	3.08031	0.0465851	0.829116
HPGDS	5	Inverse variance weighted	-0.381803	0.344459	0.267683	0.977779	0.162893	0.588484	0.0356545	1.42309e-05	TRUE	1.6551e-244	0.682629	0.347516	1.34089	3.68015	0.45102
PRSS57	6	Inverse variance weighted	-0.3428	0.310584	0.269712	0.977779	0.518752	0.270037	0.0372213	2.74533e-05	TRUE	8.71259e-252	0.70978	0.386144	1.30466	7.61442	0.178805
SMOC2	4	Inverse variance weighted	-0.336931	0.305422	0.269954	0.977779	0.935389	0.34239	0.03785	8.38431e-06	TRUE	1.76245e-262	0.713958	0.392367	1.29913	1.67505	0.642494
MAN1A2	5	Inverse variance weighted	0.534639	0.485078	0.270388	0.977779	0.0761991	0.807379	0.0199155	1.70558e-05	TRUE	1.69831e-133	1.70683	0.659605	4.4167	4.51265	0.34105
ALDOC	2	Inverse variance weighted	-1.40254	1.27533	0.271444	0.977779			0.00373025	3.53924e-06	TRUE	4.32855e-26	0.245971	0.0201976	2.99551	0.011364	0.915105
GNLY	7	Inverse variance weighted	0.290062	0.264	0.271891	0.977779	0.0954828	0.550071	0.0528764	2.4336e-05	TRUE	0	1.33651	0.79662	2.2423	6.98832	0.321929
GPC1	5	Inverse variance weighted	0.428699	0.391027	0.27293	0.977779	0.252469	0.555738	0.0352864	2.56161e-05	TRUE	1.37811e-238	1.53526	0.713399	3.30393	6.79428	0.147167
B4GALT6	4	Inverse variance weighted	0.298416	0.272636	0.273711	0.977779	0.468939	0.62327	0.0557685	6.13081e-06	TRUE	0	1.34772	0.789819	2.29971	0.916672	0.821403
SPOCK3	6	Inverse variance weighted	-0.220187	0.202606	0.277136	0.977779	-0.23207	0.235975	0.0607598	1.86224e-05	TRUE	0	0.802368	0.539402	1.19354	5.19613	0.392417
RTN4R	4	Inverse variance weighted	-0.345661	0.318314	0.277518	0.977779	-0.197382	0.524183	0.0379217	8.32291e-06	TRUE	5.05942e-263	0.707752	0.379251	1.3208	1.69164	0.638794
LCT	5	Inverse variance weighted	0.217357	0.200244	0.277719	0.977779	0.291114	0.382507	0.0542475	1.4898e-05	TRUE	0	1.24279	0.839354	1.84013	3.96063	0.411361
CD177	9	Inverse variance weighted	-0.167992	0.154914	0.278178	0.977779	0.091662	0.718025	0.140354	2.07769e-05	TRUE	0	0.845361	0.623989	1.14527	5.9907	0.648274
CFHR4	11	Inverse variance weighted	0.212735	0.19637	0.278659	0.977779	-0.112122	0.637014	0.0957374	2.24597e-05	TRUE	0	1.23706	0.841853	1.81779	6.57349	0.765003
QDPR	2	Inverse variance weighted	-0.481542	0.445562	0.279807	0.977779			0.0268959	1.61573e-05	TRUE	3.50616e-182	0.61783	0.257987	1.47958	2.57065	0.108863
CTRB1	7	Inverse variance weighted	-0.390627	0.362299	0.28095	0.977779	-0.117715	0.335188	0.0447129	1.6393e-05	TRUE	0	0.676633	0.332627	1.37641	4.49203	0.610403
AMIGO2	2	Inverse variance weighted	-0.975355	0.909047	0.283297	0.977779			0.00475707	4.21511e-06	TRUE	6.66624e-33	0.377058	0.0634763	2.23978	0.302735	0.582173
SERPINA11	4	Inverse variance weighted	0.411521	0.383858	0.28369	0.977779	0.00488973	0.963103	0.0246155	3.47297e-06	TRUE	6.69801e-171	1.50911	0.711172	3.20234	0.0486202	0.99719
CST4	5	Inverse variance weighted	0.453367	0.424422	0.285431	0.977779	0.432585	0.197477	0.0238856	1.15826e-05	TRUE	1.70768e-162	1.5736	0.684888	3.61551	2.85417	0.582518
KRT5	2	Inverse variance weighted	0.535773	0.501778	0.285633	0.977779			0.0155286	3.30526e-06	TRUE	2.60924e-107	1.70877	0.639089	4.56883	1.2326e-32	1
MAPK9	2	Inverse variance weighted	-0.669385	0.629329	0.287488	0.977779			0.0116052	5.87873e-06	TRUE	3.22621e-79	0.512023	0.14914	1.75787	0.896423	0.343743
SVEP1	81	Inverse variance weighted	0.0671195	0.0633069	0.289043	0.977779	0.249983	2.7667e-06	0.64667	0.00023684	TRUE	0	1.06942	0.94463	1.2107	80.5622	0.461346
NPL	2	Inverse variance weighted	0.5133	0.484795	0.289692	0.977779			0.00870527	3.85661e-06	TRUE	6.07763e-60	1.6708	0.646037	4.32105	0.209216	0.647382
GFRAL	3	Inverse variance weighted	-0.950631	0.899725	0.290704	0.977779	-0.0228654	0.951536	0.00986008	1.84649e-05	TRUE	9.33687e-65	0.386497	0.066265	2.25428	4.08758	0.129537
CNTNAP2	5	Inverse variance weighted	-0.340833	0.323044	0.291394	0.977779	0.212883	0.635277	0.0368454	1.07851e-05	TRUE	2.90118e-254	0.711178	0.37757	1.33955	2.60697	0.625589
BDH2	2	Inverse variance weighted	-0.475548	0.450971	0.291656	0.977779			0.0192046	3.43755e-06	TRUE	6.79962e-133	0.621544	0.256802	1.50434	0.0737648	0.785932
B3GNT8	7	Inverse variance weighted	-0.191405	0.18268	0.294751	0.977779	0.0365645	0.929283	0.0525962	1.23293e-05	TRUE	0	0.825798	0.577263	1.18134	3.15502	0.789154
ACAA1	4	Inverse variance weighted	0.434788	0.416448	0.296467	0.977779	-0.206573	0.427581	0.0316342	9.83957e-06	TRUE	1.37885e-217	1.54464	0.68287	3.49393	2.30399	0.511757
ACAT2	3	Inverse variance weighted	-0.364184	0.34914	0.296908	0.977779	-0.194078	0.752202	0.0284448	5.15573e-06	TRUE	4.63168e-197	0.694764	0.350464	1.37731	0.69035	0.708096
FCN3	4	Inverse variance weighted	0.529623	0.508554	0.297677	0.977779	0.182135	0.557986	0.0199846	8.78673e-06	TRUE	3.29444e-136	1.69829	0.62679	4.60153	1.94627	0.583633
PENK	5	Inverse variance weighted	0.360802	0.346479	0.297718	0.977779	-0.105496	0.819003	0.0411889	3.82541e-05	TRUE	2.57796e-277	1.43448	0.727387	2.82894	10.381	0.0344769
PDGFA	3	Inverse variance weighted	0.958879	0.921379	0.298015	0.977779	0.986854	0.435061	0.00336694	1.28809e-05	TRUE	2.60387e-22	2.60877	0.428689	15.8756	2.88226	0.23666
LIPN	7	Inverse variance weighted	0.31889	0.307573	0.299831	0.977779	0.0521563	0.759792	0.054228	2.98468e-05	TRUE	0	1.3756	0.752803	2.51364	8.73098	0.189282
C1QC	8	Inverse variance weighted	0.326129	0.314636	0.299956	0.977779	-0.149156	0.343201	0.050164	3.0862e-05	TRUE	0	1.38559	0.747847	2.5672	9.2289	0.236637
ANG	5	Inverse variance weighted	0.250676	0.242242	0.300755	0.977779	0.249725	0.410699	0.0508376	1.98101e-05	TRUE	0	1.28489	0.79922	2.0657	5.39017	0.249553
PEAR1	3	Inverse variance weighted	-0.500659	0.484174	0.301114	0.977779	0.469301	0.737054	0.0162787	8.3203e-06	TRUE	1.12665e-110	0.606131	0.234655	1.56568	1.8007	0.406428
ROR2	3	Inverse variance weighted	-0.601413	0.582021	0.301455	0.977779	0.734041	0.641661	0.011705	4.36806e-06	TRUE	2.14018e-80	0.548037	0.175139	1.71489	0.438945	0.802942
HK2	2	Inverse variance weighted	-1.25883	1.22214	0.303002	0.977779			0.00374634	3.44529e-06	TRUE	3.20967e-26	0.283987	0.0258817	3.11606	0.127461	0.721079
HSPG2	4	Inverse variance weighted	-0.381094	0.37082	0.304089	0.977779	-0.531945	0.37044	0.0294504	8.18944e-06	TRUE	8.55922e-203	0.683114	0.330251	1.413	1.76864	0.621784
LYZ	6	Inverse variance weighted	0.303767	0.295763	0.304391	0.977779	0.0295502	0.888893	0.0496011	7.25534e-06	TRUE	0	1.35495	0.758867	2.41926	1.44775	0.919019
CNTN1	4	Inverse variance weighted	0.335972	0.327972	0.305649	0.977779	-0.125284	0.583696	0.0323947	1.04726e-05	TRUE	9.88506e-223	1.3993	0.735759	2.66125	2.56299	0.464016
ASAH2	6	Inverse variance weighted	0.265857	0.259839	0.306232	0.977779	-0.125376	0.563316	0.0809012	2.48149e-05	TRUE	0	1.30455	0.783936	2.1709	7.07767	0.214928
LRRC4C	3	Inverse variance weighted	0.530761	0.520086	0.307479	0.977779	-0.230672	0.540126	0.0143372	5.40057e-06	TRUE	3.33979e-98	1.70023	0.61348	4.71208	0.821367	0.663197
PNLIPRP2	6	Inverse variance weighted	0.248197	0.243982	0.309021	0.977779	-0.278341	0.44161	0.0679072	6.3899e-06	TRUE	0	1.28171	0.794528	2.06763	1.16923	0.947795
ENPP7	11	Inverse variance weighted	-0.138378	0.136617	0.311114	0.977779	0.0269969	0.770478	0.0522272	3.00011e-05	TRUE	0	0.87077	0.666212	1.13814	9.32247	0.501798
EGF	3	Inverse variance weighted	0.941199	0.933546	0.31336	0.977779	0.677835	0.391926	0.00891867	1.0569e-05	TRUE	9.15812e-60	2.56305	0.411251	15.9738	2.41715	0.298622
C1QL1	3	Inverse variance weighted	0.678454	0.67342	0.313706	0.977779	0.889772	0.459711	0.0205706	2.14207e-05	TRUE	4.74451e-137	1.97083	0.526529	7.37692	4.90134	0.086236
POMC	3	Inverse variance weighted	-0.878304	0.874719	0.315332	0.977779	2.58671	0.464528	0.00594917	6.59238e-06	TRUE	1.81152e-40	0.415487	0.0748137	2.30746	1.26573	0.531068
COL3A1	2	Inverse variance weighted	1.37174	1.36942	0.316493	0.977779			0.00239095	7.91056e-06	TRUE	2.00827e-16	3.9422	0.269192	57.7317	1.362	0.243191
COL9A1	2	Inverse variance weighted	1.2727	1.28219	0.320907	0.977779			0.00291032	4.50033e-06	TRUE	2.30126e-20	3.57049	0.289269	44.071	0.567078	0.451422
KLK14	5	Inverse variance weighted	0.365398	0.36827	0.3211	0.977779	-0.224744	0.304621	0.0336627	1.26643e-05	TRUE	6.46547e-231	1.44109	0.700184	2.96598	3.38389	0.495752
FCRL1	5	Inverse variance weighted	0.339934	0.345099	0.324607	0.977779	0.0430445	0.850106	0.0331251	1.03962e-05	TRUE	6.10343e-228	1.40485	0.714295	2.76303	2.61572	0.624041
MATN2	3	Inverse variance weighted	-0.757294	0.769389	0.324978	0.977779	-0.486971	0.317179	0.0105934	1.52811e-05	TRUE	3.22687e-70	0.468934	0.103799	2.1185	3.55091	0.169406
ISG15	3	Inverse variance weighted	0.350219	0.358648	0.328817	0.977779	-0.900978	0.424569	0.028841	9.60542e-06	TRUE	6.18524e-198	1.41938	0.702767	2.86672	2.24356	0.325699
GMPR	14	Inverse variance weighted	0.133516	0.136759	0.328921	0.977779	0.0773845	0.602256	0.149123	2.47636e-05	TRUE	0	1.14284	0.874126	1.49416	7.58867	0.869328
CFD	6	Inverse variance weighted	-0.555227	0.568793	0.32899	0.977779	-0.175332	0.707484	0.014102	1.86387e-05	TRUE	2.22625e-93	0.573942	0.188236	1.74998	5.40005	0.36903
TLR3	7	Inverse variance weighted	0.219553	0.225147	0.329484	0.977779	-0.0881374	0.61186	0.057787	1.24223e-05	TRUE	0	1.24552	0.801127	1.93642	3.33393	0.765917
IGF2R	5	Inverse variance weighted	0.663257	0.684447	0.332525	0.977779	0.634567	0.508663	0.0108616	9.38116e-06	TRUE	3.25265e-73	1.9411	0.5075	7.4244	2.29685	0.681342
TP53I3	4	Inverse variance weighted	0.220757	0.228867	0.334764	0.977779	-0.0508303	0.687381	0.0310338	6.71996e-06	TRUE	1.18211e-214	1.24702	0.796265	1.95294	1.38756	0.708453
SERPINB8	2	Inverse variance weighted	-0.410329	0.425434	0.334797	0.977779			0.0226865	2.72104e-06	TRUE	9.4578e-158	0.663432	0.288177	1.52733	0.00832787	0.927288
INHBC	11	Inverse variance weighted	-0.163259	0.169524	0.335526	0.977779	-0.00367441	0.987069	0.131718	2.86613e-05	TRUE	0	0.849371	0.60925	1.18413	8.9588	0.536018
NELL1	6	Inverse variance weighted	0.258435	0.268581	0.335937	0.977779	0.468762	0.441807	0.0456586	5.99648e-06	TRUE	0	1.2949	0.764921	2.19208	1.1425	0.950273
SPINT2	4	Inverse variance weighted	-0.34345	0.357411	0.336582	0.977779	-0.282236	0.161683	0.0372762	1.89278e-05	TRUE	1.62404e-254	0.709319	0.352053	1.42914	4.99225	0.172366
PREP	3	Inverse variance weighted	-0.517595	0.53901	0.33692	0.977779	-0.455289	0.879583	0.0117768	2.77956e-06	TRUE	1.6175e-81	0.595952	0.207203	1.71406	0.0366508	0.981841
CCL8	9	Inverse variance weighted	0.1099	0.114576	0.337465	0.977779	0.0230132	0.820351	0.056833	2.81078e-05	TRUE	0	1.11617	0.891661	1.3972	8.69535	0.368644
F7	8	Inverse variance weighted	0.188109	0.196155	0.337569	0.977779	-0.0214789	0.882361	0.0764986	2.69851e-05	TRUE	0	1.20696	0.82172	1.77282	8.22725	0.312982
CFB	3	Inverse variance weighted	1.21853	1.27282	0.338392	0.977779	-0.389769	0.849326	0.00471394	1.17017e-05	TRUE	2.35241e-31	3.38221	0.279097	40.987	2.76789	0.250588
PRSS22	3	Inverse variance weighted	0.389216	0.407055	0.338984	0.977779	-0.0229262	0.974029	0.0224384	2.71894e-06	TRUE	5.2689e-156	1.47582	0.664572	3.27738	0.0235819	0.988278
BTC	2	Inverse variance weighted	0.564891	0.591303	0.33941	0.977779			0.00888665	2.79482e-06	TRUE	1.45974e-61	1.75926	0.552079	5.60604	0.0513638	0.820707
HTATIP2	5	Inverse variance weighted	-0.249499	0.261513	0.340054	0.977779	0.115601	0.386163	0.0578701	6.93979e-06	TRUE	0	0.779191	0.466702	1.30091	1.48354	0.829553
PLAU	4	Inverse variance weighted	-0.281322	0.295599	0.341249	0.977779	-0.0610432	0.793749	0.0426412	3.63263e-06	TRUE	9.31783e-300	0.754786	0.422868	1.34723	0.347283	0.950904
PROC	2	Inverse variance weighted	-0.618709	0.650543	0.341571	0.977779			0.0101483	2.94688e-06	TRUE	3.3981e-70	0.538639	0.150503	1.92775	0.111955	0.737929
CHST11	6	Inverse variance weighted	-0.28379	0.298901	0.342393	0.977779	0.111921	0.500313	0.0398658	1.71012e-05	TRUE	1.54851e-273	0.752925	0.419104	1.35264	4.99735	0.416204
HDHD2	3	Inverse variance weighted	0.307813	0.326268	0.345457	0.977779	0.193862	0.448796	0.0245132	7.76113e-06	TRUE	3.38412e-168	1.36045	0.717723	2.57873	1.78702	0.409218
ADIPOQ	4	Inverse variance weighted	0.413047	0.438007	0.345673	0.977779	0.177321	0.338529	0.0233282	8.46885e-06	TRUE	1.2394e-159	1.51142	0.640538	3.56634	2.03193	0.565806
CFHR5	2	Inverse variance weighted	-0.634927	0.674186	0.346311	0.977779			0.00923871	4.42033e-06	TRUE	2.01288e-63	0.529974	0.141376	1.9867	0.637788	0.424513
PAM	4	Inverse variance weighted	0.226365	0.24047	0.346529	0.977779	-0.118374	0.770836	0.0640753	1.22698e-05	TRUE	0	1.25403	0.782739	2.0091	3.26725	0.352226
SHMT1	6	Inverse variance weighted	-0.315829	0.335684	0.34678	0.977779	-0.184188	0.718358	0.0524446	2.12958e-05	TRUE	0	0.729184	0.377657	1.40792	6.24083	0.283486
EVL	3	Inverse variance weighted	0.550624	0.585981	0.347392	0.977779	-0.110182	0.746747	0.0141669	3.88126e-06	TRUE	1.33727e-97	1.73433	0.549965	5.46928	0.455807	0.796201
CXCL11	4	Inverse variance weighted	-0.307059	0.326928	0.347615	0.977779	-0.0885669	0.459599	0.0302965	8.69201e-06	TRUE	1.42689e-208	0.735607	0.387578	1.39615	2.116	0.548683
IDH1	3	Inverse variance weighted	-0.551702	0.587417	0.347628	0.977779	2.36687	0.474874	0.0189941	6.70535e-06	TRUE	4.93063e-130	0.575969	0.182129	1.82145	1.43081	0.488994
MAN2B2	7	Inverse variance weighted	0.258554	0.275384	0.34779	0.977779	0.359957	0.184375	0.0441005	1.59145e-05	TRUE	2.66045e-304	1.29506	0.754878	2.22178	4.60794	0.594987
ISLR2	4	Inverse variance weighted	-0.682014	0.727148	0.348281	0.977779	-1.97207	0.350293	0.0201579	2.88832e-05	TRUE	8.624e-133	0.505598	0.121575	2.10265	7.70383	0.052546
PDXK	2	Inverse variance weighted	0.82407	0.88077	0.349467	0.977779			0.00938025	7.94715e-06	TRUE	1.87403e-63	2.27976	0.40566	12.812	1.4617	0.22666
PEBP1	3	Inverse variance weighted	-0.625944	0.672282	0.351815	0.977779	0.129475	0.551772	0.0304095	2.31595e-05	TRUE	6.18532e-205	0.534756	0.143185	1.99717	5.57296	0.0616379
SIGLEC6	9	Inverse variance weighted	0.248409	0.266937	0.352066	0.977779	0.376809	0.29055	0.0517319	2.17483e-05	TRUE	0	1.28198	0.759733	2.16324	6.63577	0.576391
CR1	5	Inverse variance weighted	0.3646	0.391865	0.352152	0.977779	-0.190497	0.889017	0.0661473	4.09342e-05	TRUE	0	1.43994	0.668008	3.10389	11.6075	0.0205215
RSPO1	2	Inverse variance weighted	-0.708927	0.762292	0.352374	0.977779			0.0139754	7.6365e-06	TRUE	5.38196e-95	0.492172	0.110469	2.19277	1.41247	0.234647
SERPINH1	2	Inverse variance weighted	-0.73866	0.798896	0.355173	0.977779			0.00513457	3.29446e-06	TRUE	1.0733e-35	0.477754	0.0998091	2.28685	0.281488	0.595728
ANTXR2	2	Inverse variance weighted	-0.513008	0.55602	0.356193	0.977779			0.0137962	3.57145e-06	TRUE	3.68558e-95	0.598692	0.20133	1.78032	0.380644	0.537259
ITIH2	7	Inverse variance weighted	-0.338508	0.368282	0.358015	0.977779	0.329481	0.541078	0.0462426	3.95979e-05	TRUE	0	0.712833	0.346338	1.46715	11.9728	0.0625785
NLGN1	2	Inverse variance weighted	0.676003	0.737156	0.359121	0.977779			0.00751706	3.03296e-06	TRUE	4.58571e-52	1.966	0.463558	8.33805	0.205203	0.650553
CLEC3B	2	Inverse variance weighted	0.500934	0.54829	0.360911	0.977779			0.0141744	3.57312e-06	TRUE	8.80008e-98	1.65026	0.563429	4.83355	0.397772	0.528242
GUK1	3	Inverse variance weighted	-0.544657	0.597798	0.36224	0.977779	-0.35228	0.94713	0.0191604	1.16115e-05	TRUE	1.19346e-129	0.580041	0.179723	1.87204	2.83042	0.242874
BOC	4	Inverse variance weighted	-0.321369	0.353618	0.363454	0.977779	-0.0419372	0.803553	0.0202661	9.76228e-06	TRUE	7.43859e-138	0.725155	0.362598	1.45023	2.54143	0.46785
PZP	7	Inverse variance weighted	0.674506	0.74259	0.363711	0.977779	-0.202758	0.752875	0.0149675	3.35062e-05	TRUE	7.261e-97	1.96306	0.457962	8.41472	10.1604	0.118059
ANGPT2	2	Inverse variance weighted	0.623309	0.686645	0.364005	0.977779			0.00721018	4.74325e-06	TRUE	1.85595e-49	1.86509	0.48553	7.16446	0.812086	0.367504
EDAR	4	Inverse variance weighted	0.25583	0.281943	0.364204	0.977779	0.185565	0.463746	0.0403554	5.34612e-06	TRUE	4.42229e-282	1.29153	0.743209	2.2444	1.02071	0.796241
GHR	3	Inverse variance weighted	-0.849249	0.936644	0.364569	0.977779	0.651579	0.437274	0.00361388	7.64252e-06	TRUE	1.37058e-24	0.427736	0.0682163	2.68203	1.81407	0.403719
POSTN	4	Inverse variance weighted	-0.41133	0.454062	0.364995	0.977779	1.19583	0.28337	0.0220482	1.30949e-05	TRUE	2.95227e-149	0.662768	0.27218	1.61387	3.5467	0.314755
ROR1	3	Inverse variance weighted	0.298971	0.330032	0.364997	0.977779	-0.149008	0.475101	0.0243365	5.9298e-06	TRUE	1.04632e-167	1.34847	0.706175	2.57496	1.22477	0.542055
SERPINF2	3	Inverse variance weighted	0.586498	0.652944	0.369059	0.977779	-0.0303859	0.935457	0.0111068	2.88083e-06	TRUE	7.694e-77	1.79768	0.499938	6.46413	0.186871	0.910797
EGFR	2	Inverse variance weighted	-0.71809	0.804797	0.372252	0.977779			0.00642291	2.8659e-06	TRUE	1.27111e-44	0.487683	0.100712	2.36153	0.192415	0.660914
NPPB	3	Inverse variance weighted	0.327141	0.370368	0.377081	0.977779	0.0455374	0.935721	0.028425	7.48832e-06	TRUE	7.68203e-196	1.387	0.671138	2.86642	1.80277	0.406006
CCDC126	2	Inverse variance weighted	-0.34463	0.391236	0.378386	0.977779			0.0274	4.22181e-06	TRUE	3.69135e-190	0.708483	0.329081	1.5253	0.680313	0.409479
FUT5	7	Inverse variance weighted	0.165279	0.187863	0.378977	0.977779	0.153152	0.543316	0.0873773	1.49316e-05	TRUE	0	1.17972	0.816333	1.70487	4.37641	0.625878
PLCG2	2	Inverse variance weighted	-0.657433	0.748679	0.379876	0.977779			0.00735264	4.52028e-06	TRUE	1.725e-50	0.51818	0.119452	2.24786	0.788101	0.374675
HTN3	2	Inverse variance weighted	-0.66613	0.759525	0.380468	0.977779			0.0110382	2.71497e-06	TRUE	1.94751e-76	0.513693	0.115926	2.27627	0.167294	0.682528
PDE4A	9	Inverse variance weighted	-0.360472	0.412089	0.381714	0.977779	0.217546	0.439758	0.0970849	4.6586e-05	TRUE	0	0.697347	0.310936	1.56396	14.6664	0.0659663
MPO	6	Inverse variance weighted	-0.2946	0.339644	0.385735	0.977779	0.00640253	0.984942	0.0413054	2.88954e-05	TRUE	2.21859e-280	0.74483	0.382777	1.44933	8.66345	0.123265
ERAP1	6	Inverse variance weighted	-0.160866	0.185486	0.385795	0.977779	0.0560808	0.697913	0.0743037	1.22251e-05	TRUE	0	0.851406	0.591899	1.22469	3.46471	0.628733
S100A6	4	Inverse variance weighted	-0.817662	0.946433	0.38762	0.977779	-0.451991	0.865926	0.00940299	7.8477e-06	TRUE	1.24398e-63	0.441463	0.0690675	2.82172	1.96052	0.580642
AFM	3	Inverse variance weighted	-0.407261	0.472047	0.388272	0.977779	-0.0529068	0.919691	0.0163153	4.4089e-06	TRUE	2.70688e-112	0.66547	0.263824	1.67858	0.776431	0.678266
OXT	4	Inverse variance weighted	0.349742	0.407214	0.390415	0.977779	0.0365553	0.870137	0.0252598	4.05965e-06	TRUE	4.04657e-175	1.4187	0.63865	3.15151	0.662666	0.881948
CPB1	2	Inverse variance weighted	-0.405353	0.473297	0.391752	0.977779			0.0182952	5.20185e-06	TRUE	9.59035e-126	0.666741	0.263681	1.68592	1.03507	0.30897
TPSAB1	8	Inverse variance weighted	0.118914	0.139311	0.393335	0.977779	0.0887576	0.420034	0.0917964	1.11541e-05	TRUE	0	1.12627	0.857155	1.47988	3.11881	0.873798
A1BG	4	Inverse variance weighted	0.301787	0.354138	0.394117	0.977779	-0.00444545	0.971074	0.0340962	3.59747e-06	TRUE	3.23805e-238	1.35227	0.675486	2.70715	0.51469	0.915652
APMAP	2	Inverse variance weighted	-0.916184	1.07681	0.394862	0.977779			0.00606518	2.89524e-06	TRUE	3.64387e-42	0.400043	0.0484739	3.30145	0.274748	0.600164
CHKB	4	Inverse variance weighted	1.18372	1.39342	0.395599	0.977779	0.072698	0.950988	0.0133356	2.88627e-05	TRUE	1.4818e-86	3.26652	0.212803	50.1409	8.02525	0.0454928
CHGA	3	Inverse variance weighted	0.318603	0.376125	0.396958	0.977779	-0.588609	0.477257	0.0260079	6.18443e-06	TRUE	2.34756e-179	1.3752	0.657966	2.87429	1.4157	0.492702
FGR	2	Inverse variance weighted	0.614154	0.725373	0.397177	0.977779			0.0089823	3.58316e-06	TRUE	6.18725e-62	1.84809	0.445937	7.65903	0.519097	0.471227
CHRDL2	4	Inverse variance weighted	-0.270395	0.320159	0.398354	0.977779	-0.029449	0.870383	0.0335979	4.39527e-06	TRUE	3.8275e-234	0.763078	0.407422	1.4292	0.802785	0.848801
GSTZ1	11	Inverse variance weighted	-0.126013	0.149539	0.399407	0.977779	0.351026	0.225189	0.151808	1.77796e-05	TRUE	0	0.881603	0.657633	1.18185	5.42268	0.861216
FCGR2A	7	Inverse variance weighted	-0.109546	0.130042	0.399568	0.977779	0.0686902	0.814523	0.0948582	1.8172e-05	TRUE	0	0.896241	0.694594	1.15643	5.55853	0.474411
HPSE	2	Inverse variance weighted	-0.51603	0.613464	0.400251	0.977779			0.00765252	4.85481e-06	TRUE	1.90902e-52	0.596886	0.179349	1.98647	0.967011	0.325427
SEMA5A	5	Inverse variance weighted	-0.109258	0.130517	0.402527	0.977779	0.00467361	0.967541	0.0663584	4.7497e-06	TRUE	0	0.896499	0.694147	1.15784	0.937573	0.91911
NTF3	2	Inverse variance weighted	-1.1658	1.39557	0.403518	0.977779			0.00489736	9.48163e-06	TRUE	6.8353e-33	0.311674	0.0202192	4.80437	1.92634	0.16516
UST	3	Inverse variance weighted	-0.525288	0.631071	0.405197	0.977779	0.705617	0.48259	0.009826	7.70433e-06	TRUE	1.50807e-66	0.591385	0.171669	2.03727	1.96463	0.374443
CNTN4	5	Inverse variance weighted	0.240762	0.289271	0.405237	0.977779	0.0520511	0.697251	0.0321783	9.74346e-06	TRUE	1.76513e-221	1.27222	0.721654	2.24282	2.66812	0.614805
LILRA4	4	Inverse variance weighted	0.247262	0.297474	0.405857	0.977779	-0.0104113	0.970592	0.0318073	2.23977e-06	TRUE	7.62367e-223	1.28051	0.714776	2.29403	0.081665	0.993943
TIMP3	6	Inverse variance weighted	-0.199131	0.239693	0.406101	0.977779	-0.0359718	0.936395	0.0608079	1.78723e-05	TRUE	0	0.819443	0.512257	1.31084	5.41703	0.36713
CD58	2	Inverse variance weighted	-0.368234	0.443933	0.406833	0.977779			0.0175769	6.31773e-06	TRUE	2.53227e-120	0.691956	0.289864	1.65182	1.29097	0.25587
F11	3	Inverse variance weighted	-0.273601	0.330871	0.408288	0.977779	-0.165556	0.799476	0.0290094	6.64941e-06	TRUE	2.43962e-200	0.760636	0.39768	1.45485	1.60983	0.447126
LUM	6	Inverse variance weighted	0.329378	0.398401	0.408379	0.977779	0.0375639	0.911409	0.0258813	1.08553e-05	TRUE	1.09987e-176	1.3901	0.63668	3.0351	3.06085	0.690605
UCMA	6	Inverse variance weighted	0.458124	0.557697	0.411386	0.977779	-0.385184	0.603891	0.0462732	3.06019e-05	TRUE	0	1.58111	0.529956	4.71717	9.30048	0.0976626
GZMK	2	Inverse variance weighted	-0.515461	0.627726	0.411557	0.977779			0.00973254	2.85811e-06	TRUE	2.30259e-67	0.597225	0.174505	2.04394	0.311557	0.576726
REG3A	5	Inverse variance weighted	0.386341	0.470853	0.411923	0.977779	0.0940068	0.872777	0.020551	5.07173e-06	TRUE	1.52527e-141	1.47159	0.584774	3.70326	1.07616	0.898036
AKR1C3	3	Inverse variance weighted	-0.980702	1.19764	0.412864	0.977779	-0.960062	0.69043	0.0142843	3.59559e-05	TRUE	5.99891e-92	0.375048	0.0358622	3.92225	9.28842	0.0096171
IL1RN	3	Inverse variance weighted	-0.412853	0.504784	0.413425	0.977779	0.073135	0.778148	0.0183478	2.59851e-06	TRUE	2.36325e-127	0.661759	0.246048	1.77984	0.227381	0.892534
CTRB2	6	Inverse variance weighted	-0.119832	0.147573	0.41678	0.977779	0.114349	0.531216	0.0934867	7.44831e-06	TRUE	0	0.887069	0.664264	1.18461	1.90981	0.861478
LILRA2	10	Inverse variance weighted	-0.167439	0.206307	0.417021	0.977779	-0.0319268	0.784239	0.0657698	1.44509e-05	TRUE	0	0.845828	0.564508	1.26734	4.32591	0.888683
FETUB	3	Inverse variance weighted	1.27112	1.56933	0.417952	0.977779	2.9514	0.424192	0.00470093	1.42114e-05	TRUE	5.93855e-31	3.56485	0.164514	77.247	3.69117	0.157933
ENO3	2	Inverse variance weighted	-0.274879	0.3404	0.419369	0.977779			0.0267347	2.29222e-06	TRUE	1.1369e-186	0.759664	0.389823	1.48039	0.138582	0.709695
SMOC1	3	Inverse variance weighted	-0.497635	0.62026	0.422379	0.977779	-0.097647	0.553384	0.0139495	4.15228e-06	TRUE	5.52523e-96	0.607967	0.180262	2.05048	0.788571	0.674162
PCOLCE2	7	Inverse variance weighted	0.174044	0.217058	0.422653	0.977779	0.150823	0.685888	0.0570408	2.55754e-05	TRUE	0	1.19011	0.777718	1.82117	7.96806	0.240453
SH3GLB2	3	Inverse variance weighted	0.251984	0.314307	0.422719	0.977779	-0.0490868	0.731257	0.028241	2.54714e-06	TRUE	3.51394e-197	1.28658	0.694851	2.3822	0.23585	0.888763
MFAP2	2	Inverse variance weighted	0.269578	0.336263	0.422734	0.977779			0.027288	3.82029e-06	TRUE	1.35678e-189	1.30941	0.677397	2.5311	0.675042	0.411299
RGMB	2	Inverse variance weighted	0.495034	0.618551	0.42353	0.977779			0.009536	2.49422e-06	TRUE	3.70141e-66	1.64055	0.488055	5.51458	0.219841	0.639161
ADGRF5	4	Inverse variance weighted	-0.147402	0.184756	0.424975	0.977779	-0.160901	0.602111	0.0393344	4.51785e-06	TRUE	3.09327e-275	0.862947	0.600782	1.23951	0.921837	0.820155
CROT	2	Inverse variance weighted	0.27596	0.34697	0.426414	0.977779			0.0275543	7.56086e-06	TRUE	1.14974e-189	1.3178	0.667577	2.60132	1.59748	0.206261
FAIM	8	Inverse variance weighted	-0.235007	0.296183	0.427515	0.977779	-0.316356	0.147367	0.0539156	3.50843e-05	TRUE	0	0.790565	0.442406	1.41271	11.1032	0.134181
TNFAIP6	4	Inverse variance weighted	-0.373179	0.470795	0.427978	0.977779	1.80376	0.116313	0.0391576	2.76174e-05	TRUE	1.87249e-265	0.688542	0.273641	1.73252	7.87659	0.0486322
IL17RD	4	Inverse variance weighted	-0.325571	0.410906	0.428171	0.977779	-0.237845	0.439305	0.013501	5.95954e-06	TRUE	3.05763e-92	0.722115	0.322728	1.61576	1.42787	0.699015
SEMA3E	11	Inverse variance weighted	0.195208	0.246395	0.428212	0.977779	-0.419714	0.181558	0.0799865	3.36677e-05	TRUE	0	1.21556	0.749967	1.97021	10.9273	0.36321
PTPRJ	2	Inverse variance weighted	-0.776084	0.982709	0.42968	0.977779			0.00450307	2.82168e-06	TRUE	1.61169e-31	0.460205	0.0670582	3.15828	0.349608	0.554335
NT5DC3	2	Inverse variance weighted	-0.281393	0.358658	0.432704	0.977779			0.021628	1.80692e-06	TRUE	6.4438e-151	0.754732	0.373678	1.52436	0.00771242	0.930019
RET	3	Inverse variance weighted	0.253965	0.324327	0.433597	0.977779	-0.141024	0.537601	0.0355646	5.15937e-06	TRUE	9.1985e-248	1.28913	0.682688	2.43427	1.16647	0.558089
LEAP2	3	Inverse variance weighted	-0.42524	0.544747	0.435027	0.977779	0.0383351	0.922619	0.0312947	1.99159e-05	TRUE	5.60241e-212	0.653613	0.22471	1.90116	5.26541	0.0718839
EPHA1	5	Inverse variance weighted	0.154532	0.198167	0.435504	0.977779	-0.053262	0.808249	0.0458981	7.41675e-06	TRUE	0	1.16711	0.79146	1.72106	1.9502	0.744919
LAG3	2	Inverse variance weighted	-0.509968	0.654054	0.435566	0.977779			0.0078292	1.76765e-06	TRUE	1.05201e-54	0.600515	0.166641	2.16404	0.00178319	0.966317
COL15A1	3	Inverse variance weighted	-0.387282	0.496977	0.435817	0.977779	0.0562165	0.769849	0.0160631	2.28797e-06	TRUE	1.4633e-111	0.6789	0.256313	1.79821	0.181928	0.913051
FAHD1	2	Inverse variance weighted	-0.377245	0.484461	0.436163	0.977779			0.0129899	1.958e-06	TRUE	2.43009e-90	0.685748	0.265328	1.77234	0.0690232	0.792764
CD48	5	Inverse variance weighted	-0.450778	0.579048	0.436286	0.977779	-0.283492	0.457566	0.0298487	2.03508e-05	TRUE	1.02056e-201	0.637132	0.204802	1.9821	6.09608	0.192087
IL16	3	Inverse variance weighted	-0.2669	0.342897	0.436353	0.977779	0.159936	0.659754	0.0348637	2.87786e-06	TRUE	3.12486e-244	0.76575	0.391027	1.49957	0.386817	0.824145
OAF	6	Inverse variance weighted	0.229372	0.295155	0.437085	0.977779	0.329141	0.410458	0.0523528	4.88695e-06	TRUE	0	1.25781	0.705301	2.24314	1.08175	0.955706
TPSB2	11	Inverse variance weighted	0.135083	0.174594	0.43911	0.977779	-0.0329574	0.916014	0.0931878	1.60647e-05	TRUE	0	1.14463	0.812921	1.6117	4.94266	0.894975
GLIPR2	2	Inverse variance weighted	-0.287809	0.372075	0.439212	0.977779			0.0269456	3.04351e-06	TRUE	1.20751e-187	0.749905	0.361651	1.55497	0.451473	0.501637
UNC5C	2	Inverse variance weighted	0.508498	0.65858	0.440048	0.977779			0.0127254	7.05272e-06	TRUE	1.43774e-86	1.66279	0.457344	6.04551	1.5241	0.217
RNASE6	9	Inverse variance weighted	0.197503	0.255998	0.440409	0.977779	0.201397	0.189368	0.0698719	3.64916e-05	TRUE	0	1.21836	0.737675	2.01226	11.7156	0.164353
MST1	8	Inverse variance weighted	0.184897	0.239811	0.440702	0.977779	-0.267955	0.566679	0.114215	3.78664e-05	TRUE	0	1.20309	0.751914	1.925	12.039	0.0992828
ADH6	4	Inverse variance weighted	0.859191	1.11458	0.440787	0.977779	0.702215	0.12727	0.0159351	4.00783e-05	TRUE	1.78878e-102	2.36125	0.265701	20.9841	11.5388	0.00914207
MYOM2	3	Inverse variance weighted	-0.795029	1.03338	0.441687	0.977779	-0.171088	0.806561	0.00396166	3.69625e-06	TRUE	1.26475e-27	0.451568	0.0595789	3.42259	0.683071	0.710678
PDCD6	2	Inverse variance weighted	0.606322	0.789357	0.442415	0.977779			0.00580364	7.19959e-06	TRUE	2.29088e-39	1.83367	0.390309	8.61462	1.56187	0.211391
COL18A1	4	Inverse variance weighted	-0.608776	0.802208	0.447927	0.977779	0.339891	0.575965	0.011736	1.54655e-05	TRUE	6.4966e-78	0.544016	0.112917	2.62099	4.47545	0.214491
IL22RA2	4	Inverse variance weighted	-0.749176	0.988772	0.448641	0.977779	-0.584456	0.188211	0.0081434	1.65536e-05	TRUE	1.53577e-53	0.472756	0.0680734	3.2832	4.79276	0.187616
GXYLT1	4	Inverse variance weighted	-0.404515	0.534103	0.448828	0.977779	-0.187216	0.364594	0.0394553	2.96174e-05	TRUE	4.64302e-267	0.667301	0.234252	1.9009	8.57622	0.0354896
TSTD1	2	Inverse variance weighted	-0.249701	0.330355	0.449735	0.977779			0.0276782	6.56772e-06	TRUE	5.74872e-191	0.779034	0.407711	1.48854	1.44175	0.229857
KDR	4	Inverse variance weighted	0.292549	0.388531	0.451474	0.977779	0.33719	0.499842	0.0403457	2.52237e-05	TRUE	1.58413e-274	1.33984	0.625644	2.86931	7.31765	0.0624337
FCN1	5	Inverse variance weighted	0.251098	0.333703	0.451776	0.977779	-0.0347619	0.819309	0.0343826	2.1183e-06	TRUE	2.12077e-241	1.28544	0.668338	2.47232	0.164479	0.996798
MMAB	5	Inverse variance weighted	-0.256574	0.341191	0.452055	0.977779	-0.0947061	0.545974	0.0356708	8.00585e-06	TRUE	4.53694e-247	0.773698	0.396409	1.51008	2.19601	0.69976
MPST	2	Inverse variance weighted	-1.54698	2.06714	0.454239	0.977779			0.00540528	1.81245e-05	TRUE	3.80221e-35	0.21289	0.00370311	12.2389	4.0074	0.0453009
GP6	3	Inverse variance weighted	0.625133	0.836349	0.454789	0.977779	-0.690487	0.556793	0.0232587	2.51672e-05	TRUE	8.68505e-155	1.86849	0.362725	9.62513	6.78559	0.0336145
PARVA	2	Inverse variance weighted	-1.0039	1.35095	0.457417	0.977779			0.003327	2.86597e-06	TRUE	1.66591e-23	0.366447	0.0259451	5.17566	0.436351	0.508889
MDK	2	Inverse variance weighted	-1.12779	1.52107	0.458425	0.977779			0.00464611	3.25118e-06	TRUE	2.21841e-32	0.323748	0.0164226	6.38222	0.571698	0.449585
APOC1	3	Inverse variance weighted	-0.717656	0.970458	0.459602	0.977779	-0.238662	0.509227	0.00360519	5.84752e-06	TRUE	8.26978e-25	0.487895	0.0728208	3.26886	1.47015	0.479469
HAVCR2	5	Inverse variance weighted	-0.246077	0.333484	0.460578	0.977779	-0.043484	0.716052	0.0349512	9.58782e-06	TRUE	3.013e-241	0.781862	0.406689	1.50313	2.76267	0.598294
SCUBE3	4	Inverse variance weighted	-0.538136	0.732532	0.462568	0.977779	0.0895406	0.693521	0.0184697	2.41429e-05	TRUE	4.09719e-122	0.583835	0.138914	2.45377	7.05803	0.0700711
HRG	6	Inverse variance weighted	0.336683	0.459789	0.464012	0.977779	-0.127279	0.548946	0.0182028	1.48902e-05	TRUE	3.31226e-122	1.4003	0.568642	3.44826	4.59994	0.466625
PLA2G7	5	Inverse variance weighted	0.524986	0.718353	0.46489	0.977779	0.13828	0.675724	0.0115015	1.20242e-05	TRUE	5.39696e-77	1.69044	0.413546	6.90992	3.61345	0.460838
ASPH	2	Inverse variance weighted	-0.731022	1.00403	0.466561	0.977779			0.00465457	4.09234e-06	TRUE	3.10006e-32	0.481417	0.067278	3.44485	0.881477	0.347798
FGFR3	2	Inverse variance weighted	0.435462	0.599488	0.4676	0.977779			0.0112084	4.23678e-06	TRUE	5.0816e-77	1.54568	0.477336	5.00511	0.933769	0.333885
SERPINA10	6	Inverse variance weighted	0.292028	0.402653	0.468294	0.977779	-0.436018	0.156389	0.0412032	2.80109e-05	TRUE	6.98107e-280	1.33914	0.608248	2.9483	8.74222	0.119798
PLEKHA1	3	Inverse variance weighted	-0.268201	0.37077	0.469457	0.977779	-0.101198	0.561875	0.0287034	3.49537e-06	TRUE	7.89698e-200	0.764754	0.369757	1.58171	0.682417	0.710911
PLTP	7	Inverse variance weighted	-0.218848	0.302751	0.469762	0.977779	-0.0247254	0.958017	0.0425915	1.32025e-05	TRUE	1.81565e-294	0.803444	0.443863	1.45433	4.03146	0.672419
HGFAC	11	Inverse variance weighted	0.132652	0.184034	0.471033	0.977779	-0.00588915	0.97973	0.103633	2.37737e-05	TRUE	0	1.14185	0.79608	1.63781	7.68083	0.659981
C1S	3	Inverse variance weighted	-0.7313	1.0241	0.475173	0.977779	0.0411068	0.941109	0.00531829	1.07122e-05	TRUE	1.60647e-35	0.481283	0.0646644	3.58208	2.9443	0.229432
LDHB	2	Inverse variance weighted	0.744667	1.04288	0.475196	0.977779			0.00351975	1.52729e-06	TRUE	3.49258e-25	2.10574	0.272702	16.26	0.0169493	0.896417
APOL3	9	Inverse variance weighted	0.172452	0.245181	0.481826	0.977779	-0.0456453	0.875574	0.0479787	4.05684e-05	TRUE	0	1.18822	0.73484	1.92131	13.1785	0.105854
MXRA7	3	Inverse variance weighted	-0.365529	0.521115	0.483031	0.977779	-0.273482	0.278887	0.0291956	1.74324e-05	TRUE	6.32359e-198	0.693829	0.249845	1.92679	4.82591	0.0895503
ACVRL1	2	Inverse variance weighted	-0.322643	0.462077	0.485024	0.977779			0.0160401	1.97271e-06	TRUE	1.37362e-111	0.724233	0.292786	1.79145	0.192904	0.66051
NDST1	2	Inverse variance weighted	-0.466731	0.672607	0.487737	0.977779			0.00839987	2.14413e-06	TRUE	1.79394e-58	0.627049	0.16779	2.34334	0.258068	0.611451
GGH	5	Inverse variance weighted	0.225146	0.324566	0.487881	0.977779	-0.0551942	0.918342	0.0362181	1.46982e-05	TRUE	2.36207e-248	1.25251	0.662985	2.36622	4.5255	0.339534
CCL18	16	Inverse variance weighted	0.0975154	0.141239	0.489926	0.977779	0.0489805	0.693035	0.0957768	2.47119e-05	TRUE	0	1.10243	0.835844	1.45404	8.04732	0.921872
NQO2	8	Inverse variance weighted	0.125612	0.182544	0.49138	0.977779	0.0257606	0.874056	0.0755093	1.12337e-05	TRUE	0	1.13384	0.792807	1.62158	3.40138	0.845558
ACE	5	Inverse variance weighted	-0.157322	0.228684	0.491486	0.977779	0.704602	0.11535	0.0459516	1.99361e-05	TRUE	0	0.854428	0.545778	1.33763	6.14909	0.188288
C4BPA	3	Inverse variance weighted	0.647144	0.943796	0.492914	0.977779	0.318835	0.637744	0.0081747	1.16386e-05	TRUE	1.53308e-54	1.91008	0.300383	12.1458	3.25045	0.196867
IGFALS	4	Inverse variance weighted	-0.347119	0.506412	0.493061	0.977779	-0.110438	0.454194	0.0137521	5.08752e-06	TRUE	2.86424e-94	0.706721	0.261927	1.90684	1.28502	0.732694
TXNDC15	3	Inverse variance weighted	-0.241433	0.353079	0.494106	0.977779	-0.176568	0.456935	0.0297325	1.49489e-05	TRUE	2.03395e-202	0.785501	0.393188	1.56926	4.17933	0.123729
KLK8	5	Inverse variance weighted	-0.289487	0.423684	0.494442	0.977779	-0.159177	0.346165	0.0331539	1.70649e-05	TRUE	6.93848e-226	0.748648	0.32631	1.71761	5.27107	0.260597
FAH	6	Inverse variance weighted	-0.1309	0.191739	0.494798	0.977779	-0.237911	0.255288	0.0362995	7.59715e-06	TRUE	9.3957e-252	0.877306	0.602475	1.27751	2.15444	0.827389
SELL	5	Inverse variance weighted	-0.166654	0.244189	0.494936	0.977779	0.232854	0.637592	0.0487402	4.17655e-06	TRUE	0	0.846492	0.524524	1.3661	0.974852	0.913585
C8G	3	Inverse variance weighted	-0.239411	0.35139	0.495664	0.977779	-0.171596	0.457308	0.0350145	1.10952e-05	TRUE	4.2714e-241	0.787091	0.39529	1.56723	3.10617	0.211594
CRISPLD2	4	Inverse variance weighted	0.273065	0.401684	0.496631	0.977779	-0.156254	0.744553	0.0356641	1.51291e-05	TRUE	2.84273e-244	1.31399	0.597957	2.88743	4.52201	0.210336
MX1	3	Inverse variance weighted	-0.263605	0.388974	0.497965	0.977779	0.0851604	0.928355	0.0283931	1.33315e-05	TRUE	1.66111e-193	0.768277	0.35844	1.64672	3.73972	0.154145
LRRC15	3	Inverse variance weighted	0.189584	0.280235	0.498712	0.977779	-0.0909672	0.714138	0.0294456	2.41528e-06	TRUE	7.51294e-206	1.20875	0.697902	2.09352	0.375434	0.828849
CCL14	7	Inverse variance weighted	-0.142792	0.211586	0.499761	0.977779	0.00862132	0.941147	0.0376285	1.60741e-05	TRUE	6.32789e-258	0.866934	0.572639	1.31248	5.08907	0.532441
ECI2	4	Inverse variance weighted	0.216216	0.32227	0.502275	0.977779	-0.340837	0.435559	0.0301797	6.60453e-06	TRUE	1.19565e-208	1.24137	0.660054	2.33466	1.828	0.60886
CBR3	2	Inverse variance weighted	0.345974	0.515717	0.502309	0.977779			0.0320153	1.28325e-05	TRUE	3.40307e-219	1.41337	0.51436	3.88367	3.05254	0.080611
CTSZ	4	Inverse variance weighted	0.268656	0.401352	0.503254	0.977779	-0.10759	0.425967	0.0299951	8.00786e-06	TRUE	1.01134e-206	1.30821	0.595714	2.87286	2.31413	0.509819
ACP1	7	Inverse variance weighted	0.152486	0.228306	0.504195	0.977779	0.468084	0.472456	0.0669228	2.67993e-05	TRUE	0	1.16473	0.744536	1.82206	8.6043	0.197085
CCDC134	2	Inverse variance weighted	-0.596913	0.897076	0.505796	0.977779			0.00554107	2.9436e-06	TRUE	1.44144e-38	0.550508	0.0948763	3.19426	0.572591	0.449231
NCF1	3	Inverse variance weighted	-0.337468	0.509226	0.507517	0.977779	-0.696118	0.363642	0.033648	1.06474e-05	TRUE	1.48177e-231	0.713575	0.263013	1.93598	3.0114	0.221862
CYTL1	3	Inverse variance weighted	0.259996	0.393908	0.509226	0.977779	0.347449	0.390665	0.0294028	1.13404e-05	TRUE	2.86838e-201	1.29693	0.599258	2.80683	3.21201	0.200688
APOA5	8	Inverse variance weighted	-0.20236	0.307199	0.510071	0.977779	0.109295	0.332941	0.0688028	4.9401e-05	TRUE	0	0.816801	0.447325	1.49145	16.0456	0.0247029
EFNB2	2	Inverse variance weighted	-0.993145	1.5169	0.512649	0.977779			0.00247628	6.09968e-06	TRUE	3.24881e-17	0.37041	0.0189438	7.24265	1.4727	0.22492
APCS	3	Inverse variance weighted	-0.363075	0.554892	0.512908	0.977779	0.447309	0.508935	0.0275292	1.63288e-05	TRUE	1.45939e-186	0.695534	0.234415	2.06373	4.63932	0.0983071
VEGFA	4	Inverse variance weighted	-0.189583	0.291511	0.515469	0.977779	-0.171561	0.315265	0.0318169	8.18944e-06	TRUE	1.48607e-219	0.827304	0.467225	1.46489	2.40187	0.493286
FKBP1B	2	Inverse variance weighted	-0.299789	0.461512	0.515963	0.977779			0.0206438	1.22563e-06	TRUE	1.869e-144	0.740974	0.299886	1.83084	0.000802817	0.977396
AOC1	10	Inverse variance weighted	0.089784	0.138537	0.516927	0.977779	-0.0225181	0.860475	0.0834617	1.40329e-05	TRUE	0	1.09394	0.833812	1.43522	4.42042	0.88163
PLAUR	3	Inverse variance weighted	0.386581	0.597809	0.517849	0.977779	0.0974789	0.616601	0.0097435	2.71764e-06	TRUE	1.69806e-67	1.47194	0.456063	4.75067	0.519232	0.771348
ALDH2	2	Inverse variance weighted	-0.754073	1.16752	0.51836	0.977779			0.00370254	1.64369e-06	TRUE	2.13435e-26	0.470446	0.0477196	4.63792	0.149806	0.69872
SPINK6	6	Inverse variance weighted	-0.15325	0.237699	0.519107	0.977779	0.20563	0.271722	0.0567216	1.51208e-05	TRUE	0	0.857915	0.538407	1.36703	4.80003	0.440769
PGLS	3	Inverse variance weighted	0.389259	0.603822	0.519149	0.977779	-0.356723	0.55332	0.00887877	3.94018e-06	TRUE	4.17437e-61	1.47589	0.451928	4.81989	0.943512	0.623906
CTSV	2	Inverse variance weighted	-0.355716	0.553226	0.520233	0.977779			0.0125955	2.23379e-06	TRUE	1.87684e-87	0.700671	0.236919	2.07219	0.357081	0.550132
CA10	4	Inverse variance weighted	-0.190719	0.297252	0.521128	0.977779	-0.0319802	0.712669	0.0240858	3.01571e-06	TRUE	1.95339e-167	0.826365	0.461472	1.47978	0.628562	0.889864
IGF1R	2	Inverse variance weighted	0.571454	0.891509	0.521525	0.977779			0.00600487	2.25527e-06	TRUE	5.79897e-42	1.77084	0.30854	10.1636	0.367046	0.544619
ADGRE2	4	Inverse variance weighted	-0.201871	0.315194	0.521871	0.977779	-0.187958	0.26242	0.0323944	1.41936e-05	TRUE	2.02692e-221	0.817201	0.440585	1.51575	4.30694	0.230171
CRYZ	5	Inverse variance weighted	-0.165666	0.258998	0.522404	0.977779	0.242554	0.276039	0.067342	1.275e-05	TRUE	0	0.847329	0.510022	1.40772	3.98877	0.407528
POMGNT2	4	Inverse variance weighted	-0.228258	0.358678	0.524525	0.977779	0.0186282	0.974818	0.0299535	5.48751e-06	TRUE	1.37904e-207	0.795919	0.394054	1.60762	1.48785	0.685077
C1RL	5	Inverse variance weighted	0.405848	0.639733	0.525819	0.977779	0.64081	0.376186	0.00852748	6.34761e-06	TRUE	4.9946e-58	1.50057	0.428258	5.25786	1.78704	0.774853
DTYMK	4	Inverse variance weighted	0.598151	0.945608	0.527023	0.977779	-0.0283759	0.979202	0.00573683	6.76317e-06	TRUE	5.33047e-39	1.81875	0.285007	11.6062	1.93272	0.586487
FAM20B	2	Inverse variance weighted	0.781749	1.23614	0.527118	0.977779			0.00355277	6.23024e-06	TRUE	2.14547e-24	2.18529	0.19377	24.6452	1.53508	0.215352
CPB2	4	Inverse variance weighted	0.368708	0.5848	0.528377	0.977779	0.19073	0.531149	0.0155838	5.21302e-06	TRUE	6.70201e-107	1.44587	0.459554	4.54904	1.40063	0.705386
C9	5	Inverse variance weighted	0.274431	0.435352	0.528456	0.977779	-0.0701602	0.844778	0.0131383	6.38511e-06	TRUE	1.31573e-89	1.31578	0.560537	3.08861	1.80509	0.771552
IL1R1	2	Inverse variance weighted	-0.346704	0.550452	0.528791	0.977779			0.0142773	2.48021e-06	TRUE	5.18224e-99	0.707015	0.240367	2.07961	0.458797	0.498187
MLN	5	Inverse variance weighted	0.158836	0.254095	0.531902	0.977779	0.237807	0.235768	0.038156	1.24448e-05	TRUE	5.66645e-263	1.17215	0.712347	1.92873	3.90187	0.419449
ENPP2	3	Inverse variance weighted	0.569119	0.911735	0.532486	0.977779	0.266143	0.728661	0.00420957	3.4882e-06	TRUE	2.3564e-29	1.76671	0.295856	10.5499	0.813559	0.665791
SAA4	7	Inverse variance weighted	0.0939752	0.150612	0.532656	0.977779	0.14647	0.475919	0.0927584	1.73121e-05	TRUE	0	1.09853	0.817729	1.47576	5.58221	0.471577
KLB	7	Inverse variance weighted	-0.163377	0.262723	0.534033	0.977779	-0.489177	0.21848	0.0495707	1.48111e-05	TRUE	0	0.849271	0.507472	1.42128	4.72216	0.579909
PSAPL1	4	Inverse variance weighted	-0.314189	0.506273	0.534867	0.977779	-0.178296	0.330241	0.0297693	2.33752e-05	TRUE	2.10531e-200	0.730381	0.27077	1.97014	7.14559	0.0673992
SIGLEC14	5	Inverse variance weighted	0.149655	0.241572	0.535584	0.977779	0.188046	0.237905	0.057781	2.15126e-05	TRUE	0	1.16143	0.723376	1.86477	6.77079	0.148508
NCR3	4	Inverse variance weighted	0.422195	0.681926	0.535836	0.977779	1.83498	0.489975	0.00584757	3.52021e-06	TRUE	1.70264e-40	1.52531	0.400765	5.80529	0.830932	0.842055
PCSK9	4	Inverse variance weighted	-0.449454	0.726586	0.536191	0.977779	1.01332	0.143088	0.0148857	1.93143e-05	TRUE	1.39709e-98	0.637977	0.153576	2.65025	5.90858	0.116144
NAAA	5	Inverse variance weighted	0.129039	0.208674	0.536327	0.977779	0.0383117	0.777507	0.0687281	5.6e-06	TRUE	0	1.13774	0.755812	1.71265	1.54923	0.817886
B3GAT3	2	Inverse variance weighted	-0.263261	0.427362	0.537886	0.977779			0.0268164	1.14632e-06	TRUE	2.96338e-188	0.768542	0.332575	1.77601	0.0159307	0.89956
MANSC1	3	Inverse variance weighted	0.236161	0.385515	0.54015	0.977779	-0.00492564	0.976347	0.0231493	5.22479e-06	TRUE	1.10716e-159	1.26638	0.594849	2.696	1.42694	0.48994
SPHK1	2	Inverse variance weighted	-0.68283	1.11622	0.540714	0.977779			0.00300381	1.1249e-06	TRUE	8.79708e-22	0.505185	0.0566636	4.50399	0.0138014	0.90648
EGLN1	2	Inverse variance weighted	-0.582652	0.953356	0.541094	0.977779			0.0160071	3.80038e-06	TRUE	2.05927e-110	0.558415	0.0861876	3.61801	0.937362	0.332957
PPIH	2	Inverse variance weighted	-1.02983	1.69416	0.543272	0.977779			0.00224175	5.70436e-06	TRUE	1.0554e-15	0.357066	0.0129018	9.88204	1.43674	0.230667
CD109	4	Inverse variance weighted	-0.219219	0.36077	0.543425	0.977779	0.133097	0.504942	0.0469854	1.96143e-05	TRUE	0	0.803146	0.396005	1.62888	6.02421	0.110438
MDGA2	5	Inverse variance weighted	-0.165514	0.274867	0.547067	0.977779	-0.170669	0.546833	0.0385356	6.59603e-06	TRUE	2.79205e-268	0.847458	0.494477	1.45241	1.91259	0.751831
COLGALT1	2	Inverse variance weighted	-0.571324	0.949048	0.547176	0.977779			0.007714	7.16633e-06	TRUE	2.64918e-52	0.564777	0.0879085	3.62847	1.81438	0.177984
CST1	5	Inverse variance weighted	-0.184096	0.305935	0.547341	0.977779	-0.118527	0.571004	0.0356512	1.00189e-05	TRUE	4.66729e-246	0.831856	0.4567	1.51518	3.09375	0.542261
LILRB5	7	Inverse variance weighted	0.143904	0.240167	0.549049	0.977779	-0.0739574	0.637945	0.0503965	1.86821e-05	TRUE	0	1.15477	0.721212	1.84897	6.08026	0.414259
TWSG1	3	Inverse variance weighted	0.683791	1.14306	0.5497	0.977779	-0.838438	0.413627	0.00627485	1.24553e-05	TRUE	1.18375e-41	1.98138	0.21085	18.6192	3.64422	0.161685
PGM2	5	Inverse variance weighted	-0.635453	1.0635	0.550165	0.977779	0.0444795	0.936327	0.00932921	2.28725e-05	TRUE	1.41729e-60	0.529696	0.065881	4.25885	7.24305	0.123588
SLAMF7	8	Inverse variance weighted	0.168494	0.282494	0.550874	0.977779	0.0391525	0.831124	0.0529004	2.11039e-05	TRUE	0	1.18352	0.680318	2.05892	6.92371	0.436866
IL5RA	8	Inverse variance weighted	0.149204	0.250164	0.550893	0.977779	0.389907	0.194246	0.0576574	1.88516e-05	TRUE	0	1.16091	0.710975	1.89558	6.14686	0.52271
CSF2RB	5	Inverse variance weighted	-0.186939	0.314228	0.551901	0.977779	-0.0981564	0.39878	0.0369177	5.06833e-06	TRUE	1.6252e-257	0.829495	0.448061	1.53564	1.39431	0.845183
SPARCL1	8	Inverse variance weighted	0.159036	0.267347	0.551931	0.977779	-0.0581761	0.901003	0.0495446	3.60798e-05	TRUE	0	1.17238	0.694222	1.97988	11.8463	0.105728
SOD3	6	Inverse variance weighted	-0.157063	0.264517	0.552665	0.977779	0.110194	0.68197	0.0526415	1.43142e-05	TRUE	0	0.85465	0.508893	1.43532	4.58492	0.468603
IFNAR1	5	Inverse variance weighted	-0.129396	0.217967	0.552746	0.977779	0.0570142	0.851302	0.0649546	1.49411e-05	TRUE	0	0.878626	0.573148	1.34692	4.73639	0.31543
SORD	3	Inverse variance weighted	0.268642	0.453893	0.553943	0.977779	1.27712	0.503614	0.0222125	4.20537e-06	TRUE	1.36896e-153	1.30819	0.537413	3.18443	1.10027	0.576871
UGT1A6	2	Inverse variance weighted	0.316404	0.536559	0.555398	0.977779			0.0143131	1.02572e-06	TRUE	3.47455e-100	1.37218	0.479384	3.92772	0.00607157	0.937891
NPW	4	Inverse variance weighted	0.124456	0.212198	0.557535	0.977779	0.0795914	0.749694	0.0311179	6.87836e-06	TRUE	3.54271e-215	1.13253	0.747177	1.71663	2.02858	0.566496
ADAM22	2	Inverse variance weighted	0.169196	0.289211	0.558531	0.977779			0.0419792	1.2918e-06	TRUE	3.76237e-297	1.18435	0.671892	2.08767	0.10333	0.747869
VWA1	7	Inverse variance weighted	-0.214824	0.37046	0.561992	0.977779	0.0319164	0.864066	0.0426942	2.93606e-05	TRUE	3.7719e-290	0.806683	0.390266	1.66742	9.59	0.143014
HHIP	2	Inverse variance weighted	0.38643	0.66656	0.562091	0.977779			0.0099754	1.36057e-06	TRUE	9.3534e-70	1.47172	0.398508	5.43515	0.133211	0.715125
FCGR3A	8	Inverse variance weighted	0.0867701	0.149973	0.562879	0.977779	0.0627375	0.670423	0.0978435	3.47158e-05	TRUE	0	1.09065	0.812875	1.46333	11.4283	0.120999
CRTAM	6	Inverse variance weighted	-0.28873	0.499615	0.563328	0.977779	-0.101029	0.679429	0.0321383	2.97388e-05	TRUE	1.69711e-215	0.749214	0.281401	1.99474	9.61568	0.0868867
PDGFRL	5	Inverse variance weighted	0.184335	0.319686	0.5642	0.977779	-0.0315249	0.866486	0.035467	2.0529e-05	TRUE	3.19365e-241	1.20242	0.64259	2.24997	6.53776	0.162427
TAGLN	3	Inverse variance weighted	0.962595	1.66943	0.564209	0.977779	-0.834249	0.179658	0.00435757	4.02182e-05	TRUE	1.68195e-26	2.61848	0.0993125	69.0391	11.8952	0.00261206
CCL22	5	Inverse variance weighted	0.219333	0.380855	0.564686	0.977779	-0.176052	0.586703	0.0344952	6.42363e-06	TRUE	1.94594e-239	1.24525	0.590289	2.62691	1.88407	0.75707
FUT8	9	Inverse variance weighted	0.101275	0.176029	0.565068	0.977779	-0.245325	0.476121	0.105869	1.07396e-05	TRUE	0	1.10658	0.783689	1.56251	3.37346	0.908785
ERAP2	5	Inverse variance weighted	0.197324	0.343582	0.565755	0.977779	0.249306	0.65244	0.0701144	2.13633e-05	TRUE	0	1.21814	0.621203	2.38869	6.80759	0.146412
PPIE	2	Inverse variance weighted	0.19139	0.334293	0.566968	0.977779			0.0267483	2.8716e-06	TRUE	2.33054e-186	1.21093	0.628875	2.33171	0.662732	0.415597
CSF1R	2	Inverse variance weighted	0.434523	0.760786	0.567898	0.977779			0.00674913	1.91057e-06	TRUE	3.32513e-47	1.54423	0.34763	6.8597	0.332804	0.564013
IL6ST	4	Inverse variance weighted	0.208021	0.365147	0.568887	0.977779	0.254998	0.667562	0.0302163	3.68973e-06	TRUE	1.8358e-210	1.23124	0.601898	2.51862	0.948165	0.813792
SCG3	3	Inverse variance weighted	-0.229117	0.402406	0.569107	0.977779	-0.776635	0.336622	0.029103	1.07714e-05	TRUE	2.34554e-199	0.795235	0.361377	1.74997	3.19717	0.202183
UGDH	3	Inverse variance weighted	-0.214269	0.37739	0.570194	0.977779	-0.0819523	0.628812	0.0280929	2.33645e-06	TRUE	2.76741e-196	0.807131	0.385215	1.69116	0.483565	0.785227
SCARA5	4	Inverse variance weighted	0.217917	0.384521	0.570902	0.977779	0.153735	0.486533	0.0340181	1.18307e-05	TRUE	9.74133e-234	1.24348	0.585234	2.64211	3.68617	0.297407
SPON2	3	Inverse variance weighted	-0.185467	0.327876	0.571623	0.977779	-0.0704846	0.70209	0.0286404	1.75082e-06	TRUE	1.16784e-200	0.830716	0.436876	1.5796	0.283942	0.867646
PYGL	2	Inverse variance weighted	-0.411286	0.732901	0.574678	0.977779			0.00678589	9.68977e-07	TRUE	6.60833e-48	0.662798	0.157588	2.78766	0.019317	0.889462
PSMB4	3	Inverse variance weighted	-0.207047	0.369743	0.575496	0.977779	0.265397	0.550928	0.0281185	5.7391e-06	TRUE	1.83888e-194	0.812982	0.393867	1.67808	1.66603	0.434736
PDCD5	5	Inverse variance weighted	0.254379	0.45703	0.577806	0.977779	0.273814	0.0841376	0.0303742	2.58207e-05	TRUE	4.72549e-204	1.28966	0.526555	3.15869	8.26627	0.0822972
HS6ST3	2	Inverse variance weighted	0.857244	1.5428	0.578456	0.977779			0.0048363	1.16026e-05	TRUE	3.50539e-32	2.35666	0.114561	48.4791	3.058	0.0803406
NAGK	3	Inverse variance weighted	0.301465	0.545735	0.580673	0.977779	-0.210227	0.457104	0.015272	7.20199e-06	TRUE	4.58205e-104	1.35184	0.463859	3.9397	2.15535	0.340386
PLXNA1	3	Inverse variance weighted	0.252946	0.459647	0.58211	0.977779	0.429762	0.342363	0.0255974	9.41699e-06	TRUE	3.44133e-175	1.28781	0.523111	3.17039	2.8211	0.24401
DEFB4A	5	Inverse variance weighted	-0.327817	0.596193	0.582422	0.977779	-0.516077	0.287949	0.0116185	1.048e-05	TRUE	3.99946e-78	0.720495	0.223945	2.31804	3.31256	0.506945
KLKB1	5	Inverse variance weighted	-0.293397	0.533632	0.582449	0.977779	-0.413622	0.634284	0.0186914	4.82531e-06	TRUE	1.16009e-128	0.745726	0.262025	2.12234	1.36212	0.850751
CD33	8	Inverse variance weighted	-0.163002	0.297734	0.584052	0.977779	-1.47276	0.0224663	0.114309	7.85239e-05	TRUE	0	0.849589	0.473994	1.52281	25.9736	0.000509165
MICB	6	Inverse variance weighted	-0.178791	0.327648	0.585285	0.977779	0.287675	0.555287	0.0260859	4.83666e-06	TRUE	1.52337e-180	0.83628	0.439999	1.58947	1.37056	0.927506
RNASET2	6	Inverse variance weighted	-0.131448	0.241211	0.585788	0.977779	-0.1901	0.362118	0.0585928	7.23693e-06	TRUE	0	0.876825	0.5465	1.40681	2.1993	0.820938
IL12B	9	Inverse variance weighted	-0.182095	0.334322	0.585981	0.977779	-0.0360905	0.90159	0.0490642	4.78114e-05	TRUE	0	0.833522	0.432849	1.60508	15.9021	0.0438023
CPXM1	8	Inverse variance weighted	0.160013	0.293881	0.58611	0.977779	0.0230952	0.880189	0.0412772	1.38228e-05	TRUE	8.60744e-285	1.17353	0.659684	2.08761	4.47147	0.72415
CDCP1	3	Inverse variance weighted	-0.279603	0.513912	0.586395	0.977779	-0.214872	0.443308	0.0280713	1.34767e-05	TRUE	3.353e-191	0.756084	0.276133	2.07024	4.04926	0.132043
GAS1	2	Inverse variance weighted	-0.4621	0.851954	0.587543	0.977779			0.00513218	8.9149e-07	TRUE	1.56999e-36	0.629959	0.118608	3.34588	0.0133063	0.908166
CDH17	3	Inverse variance weighted	0.18869	0.34825	0.58794	0.977779	-0.448932	0.432824	0.0296781	5.32264e-06	TRUE	1.02099e-205	1.20767	0.610254	2.38992	1.54239	0.462461
STAT6	4	Inverse variance weighted	0.504322	0.930912	0.58799	0.977779	0.0394144	0.950286	0.00957861	1.23962e-05	TRUE	7.00415e-64	1.65586	0.267064	10.2667	3.89484	0.273045
ST3GAL6	8	Inverse variance weighted	0.0846812	0.156443	0.588307	0.977779	0.0972014	0.503593	0.074452	1.57673e-05	TRUE	0	1.08837	0.800958	1.47892	5.14569	0.64219
RNASE1	4	Inverse variance weighted	0.218947	0.405535	0.589268	0.977779	-0.166054	0.759696	0.0323168	9.04743e-06	TRUE	9.63812e-223	1.24477	0.562198	2.75604	2.82928	0.418703
LTF	4	Inverse variance weighted	0.258007	0.478496	0.589746	0.977779	0.113305	0.43566	0.0241401	7.30899e-06	TRUE	9.35715e-166	1.29435	0.506696	3.30639	2.23037	0.525991
TIE1	3	Inverse variance weighted	-0.223182	0.41527	0.590964	0.977779	0.124758	0.594944	0.0213086	5.08013e-06	TRUE	7.69023e-147	0.799969	0.354477	1.80534	1.46347	0.481072
ADAMTSL1	4	Inverse variance weighted	0.179373	0.334503	0.591794	0.977779	0.0398761	0.882193	0.0430714	5.49623e-06	TRUE	1.29328e-301	1.19647	0.621106	2.30481	1.60829	0.657513
C7	6	Inverse variance weighted	-0.231578	0.432156	0.592051	0.977779	0.447634	0.424126	0.0207479	4.127e-06	TRUE	2.34925e-143	0.793281	0.34007	1.85049	1.13639	0.950832
ALDH6A1	2	Inverse variance weighted	0.564465	1.05736	0.593451	0.977779			0.00458602	1.7071e-06	TRUE	1.98506e-32	1.75851	0.22136	13.9698	0.303852	0.581477
PRSS8	2	Inverse variance weighted	-0.524135	0.983486	0.594078	0.977779			0.00346835	2.25023e-06	TRUE	1.27985e-24	0.592067	0.0861411	4.06941	0.492156	0.482967
CST5	7	Inverse variance weighted	0.126257	0.242289	0.602297	0.977779	0.122445	0.72254	0.0623727	1.09989e-05	TRUE	0	1.13457	0.705654	1.8242	3.52232	0.740997
HSP90B1	5	Inverse variance weighted	-0.116847	0.224446	0.602643	0.977779	-0.175155	0.184128	0.0508175	1.45369e-05	TRUE	0	0.889721	0.573062	1.38136	4.69605	0.31993
NCAN	2	Inverse variance weighted	0.730505	1.41555	0.605814	0.977779			0.00611477	1.11956e-05	TRUE	8.96243e-41	2.07613	0.129514	33.2807	3.0496	0.0807572
IGLL1	5	Inverse variance weighted	-0.114014	0.221751	0.607143	0.977779	-0.156905	0.471731	0.0532838	8.33658e-06	TRUE	0	0.892245	0.577732	1.37798	2.61122	0.624837
MUC16	2	Inverse variance weighted	0.36975	0.724253	0.609683	0.977779			0.0105245	7.57725e-07	TRUE	5.55863e-74	1.44737	0.350013	5.98517	0.000728325	0.97847
TNFSF8	2	Inverse variance weighted	0.489525	0.959768	0.61002	0.977779			0.00889328	7.19603e-06	TRUE	2.5836e-60	1.63154	0.248672	10.7046	1.96974	0.160475
LILRB2	10	Inverse variance weighted	-0.0582695	0.114317	0.610248	0.977779	0.019978	0.726805	0.142205	8.3652e-06	TRUE	0	0.943396	0.754025	1.18033	2.62562	0.977312
NTN1	2	Inverse variance weighted	-0.503168	0.988251	0.610647	0.977779			0.00757698	6.38244e-06	TRUE	1.50071e-51	0.604612	0.0871486	4.19463	1.7483	0.18609
FCGR3B	5	Inverse variance weighted	-0.153011	0.301338	0.611613	0.977779	-0.126451	0.356721	0.0377371	7.30216e-06	TRUE	3.44411e-262	0.85812	0.475383	1.549	2.26091	0.687894
ENPEP	6	Inverse variance weighted	0.156058	0.307552	0.61186	0.977779	-0.0158127	0.949258	0.048746	2.12436e-05	TRUE	0	1.16889	0.639708	2.13584	6.96884	0.222968
TAPBP	2	Inverse variance weighted	-0.127835	0.252294	0.612374	0.977779			0.0281392	9.90446e-07	TRUE	7.49441e-198	0.879999	0.536691	1.44291	0.0849066	0.770755
XXYLT1	2	Inverse variance weighted	-0.348931	0.689708	0.612918	0.977779			0.0173702	7.88713e-06	TRUE	2.3344e-118	0.705442	0.182545	2.72616	2.16612	0.141082
GM2A	3	Inverse variance weighted	0.195594	0.386923	0.613199	0.977779	0.0298377	0.862539	0.0279943	3.2316e-06	TRUE	5.82582e-195	1.21603	0.569627	2.59598	0.859145	0.650787
PCBD1	5	Inverse variance weighted	0.321644	0.637319	0.613781	0.977779	0.0400731	0.970459	0.0122893	1.09347e-05	TRUE	1.34638e-82	1.37939	0.395541	4.81044	3.51704	0.475293
SNX8	2	Inverse variance weighted	-0.424128	0.84645	0.616324	0.977779			0.00541611	1.43298e-06	TRUE	3.10427e-38	0.65434	0.124535	3.43808	0.243218	0.621892
SRGN	3	Inverse variance weighted	-0.28602	0.574546	0.618611	0.977779	0.530382	0.569118	0.0147491	4.44876e-06	TRUE	2.08649e-101	0.751248	0.243624	2.31657	1.2867	0.525528
APRT	4	Inverse variance weighted	-0.198594	0.405038	0.623914	0.977779	0.0805229	0.923146	0.0260462	1.54843e-06	TRUE	2.17531e-182	0.819882	0.37066	1.81354	0.293701	0.961209
SPATA20	3	Inverse variance weighted	0.319859	0.653254	0.624389	0.977779	-0.166106	0.849478	0.0286942	3.04841e-05	TRUE	2.54024e-191	1.37693	0.382694	4.95421	9.38953	0.009143
AMY2B	4	Inverse variance weighted	-0.264211	0.540072	0.62469	0.977779	0.378323	0.552031	0.0494309	3.56666e-05	TRUE	0	0.767812	0.266401	2.21296	11.3938	0.00977638
TNFSF12	3	Inverse variance weighted	0.175729	0.359734	0.625197	0.977779	0.704002	0.608859	0.0298094	2.43975e-06	TRUE	2.00762e-208	1.19212	0.588988	2.41285	0.602919	0.739738
BTD	4	Inverse variance weighted	0.101197	0.208229	0.626977	0.977779	0.128889	0.632544	0.0361638	4.75495e-06	TRUE	2.70313e-252	1.10649	0.7357	1.66417	1.40396	0.704606
TGM3	5	Inverse variance weighted	-0.133978	0.276192	0.627612	0.977779	-0.33985	0.360307	0.0313406	1.19972e-05	TRUE	1.02704e-214	0.874609	0.508997	1.50284	3.90296	0.419298
SECTM1	2	Inverse variance weighted	-0.289549	0.599223	0.628948	0.977779			0.0155645	5.02839e-06	TRUE	7.77119e-107	0.748601	0.231303	2.42281	1.40614	0.235698
HMOX1	4	Inverse variance weighted	0.441656	0.915527	0.629518	0.977779	-0.141466	0.406263	0.00529497	5.5618e-06	TRUE	2.96219e-36	1.55528	0.258521	9.35666	1.68574	0.640108
APOF	4	Inverse variance weighted	0.266933	0.554403	0.630177	0.977779	0.306664	0.334398	0.0172751	7.47529e-06	TRUE	7.82455e-118	1.30595	0.440565	3.87119	2.34667	0.503639
TIMD4	3	Inverse variance weighted	0.241018	0.500706	0.630263	0.977779	-0.0704064	0.728749	0.0140457	2.03363e-06	TRUE	1.21134e-97	1.27254	0.476939	3.39534	0.469759	0.790666
APOA1	4	Inverse variance weighted	0.270726	0.563854	0.631131	0.977779	0.15559	0.312934	0.0267435	7.05682e-06	TRUE	3.67393e-184	1.31092	0.434123	3.95856	2.20361	0.531238
GPNMB	21	Inverse variance weighted	-0.0449329	0.0937078	0.631583	0.977779	-0.015118	0.832053	0.233975	1.27354e-05	TRUE	0	0.956062	0.795647	1.14882	4.16295	0.999936
OLFM2	3	Inverse variance weighted	-0.10955	0.228952	0.632305	0.977779	0.0438567	0.775193	0.0405578	1.0881e-06	TRUE	4.33249e-287	0.896237	0.572183	1.40382	0.146375	0.929427
PRSS3	3	Inverse variance weighted	0.137391	0.287545	0.632787	0.977779	-0.0325388	0.833552	0.0343616	9.00734e-07	TRUE	1.49308e-242	1.14728	0.652988	2.01572	0.0823939	0.95964
LGMN	4	Inverse variance weighted	0.280637	0.588128	0.633241	0.977779	0.152985	0.528946	0.0127631	1.22804e-05	TRUE	1.56546e-85	1.32397	0.418075	4.1928	3.93715	0.268331
ALKBH3	4	Inverse variance weighted	-0.184049	0.386436	0.633881	0.977779	-0.0753575	0.607903	0.0263635	4.94026e-06	TRUE	1.88386e-182	0.831895	0.390057	1.77423	1.47723	0.687535
PCDH9	3	Inverse variance weighted	0.157323	0.331026	0.634602	0.977779	-0.200202	0.491655	0.0275712	4.02793e-06	TRUE	1.76217e-191	1.17037	0.611716	2.23923	1.1635	0.558919
GFRA2	5	Inverse variance weighted	-0.12967	0.273121	0.634949	0.977779	0.103487	0.578736	0.0448849	9.69316e-06	TRUE	0	0.878385	0.51428	1.50027	3.11809	0.538261
GLTPD2	2	Inverse variance weighted	-0.164887	0.347979	0.635613	0.977779			0.0235542	2.54712e-06	TRUE	5.54561e-164	0.84799	0.428731	1.67724	0.654061	0.418664
CTSS	2	Inverse variance weighted	0.285941	0.607015	0.637597	0.977779			0.0343215	1.15296e-05	TRUE	5.28143e-236	1.33101	0.405025	4.37405	3.25475	0.0712169
MATN3	6	Inverse variance weighted	0.112988	0.240223	0.638106	0.977779	-0.0842026	0.609802	0.0498758	1.19821e-05	TRUE	0	1.11962	0.699179	1.79288	3.91182	0.56218
SFRP1	3	Inverse variance weighted	0.238451	0.507627	0.638543	0.977779	0.0830645	0.937079	0.0147959	2.51335e-06	TRUE	1.32649e-102	1.26928	0.469307	3.43288	0.646284	0.723871
VWA2	5	Inverse variance weighted	-0.24134	0.517492	0.640954	0.977779	0.465303	0.713338	0.0206944	4.19544e-06	TRUE	6.01148e-143	0.785574	0.284898	2.16613	1.22965	0.873193
CD8A	2	Inverse variance weighted	-0.191522	0.41084	0.641093	0.977779			0.0284958	6.48296e-07	TRUE	7.68336e-201	0.825702	0.36907	1.8473	0.0063022	0.936725
SH3BGRL3	2	Inverse variance weighted	-0.16401	0.356543	0.645517	0.977779			0.0284639	1.15818e-06	TRUE	5.58736e-200	0.848734	0.421964	1.70713	0.187896	0.664674
IGFBP3	3	Inverse variance weighted	-0.205184	0.447743	0.646764	0.977779	0.160009	0.444462	0.0319166	1.88319e-05	TRUE	1.19589e-216	0.814498	0.338659	1.95892	5.87854	0.0529044
TREML1	4	Inverse variance weighted	-0.223407	0.487632	0.646846	0.977779	-0.231646	0.462349	0.011746	3.08821e-06	TRUE	3.59479e-81	0.799789	0.307535	2.07996	0.855331	0.836192
FABP2	10	Inverse variance weighted	0.13566	0.296696	0.647502	0.977779	-0.116543	0.750272	0.0863864	5.42515e-05	TRUE	0	1.14529	0.640271	2.04865	18.2886	0.0319692
AGRN	3	Inverse variance weighted	-0.20736	0.453764	0.647687	0.977779	0.437384	0.392346	0.0291533	9.54353e-06	TRUE	3.67261e-200	0.812727	0.333959	1.97786	2.98066	0.225298
WFDC1	5	Inverse variance weighted	0.123093	0.269904	0.648346	0.977779	-0.182814	0.489531	0.0400176	7.86433e-06	TRUE	2.76773e-278	1.13099	0.666364	1.91958	2.50468	0.643798
OGN	5	Inverse variance weighted	-0.254962	0.559729	0.648743	0.977779	0.376637	0.393576	0.0329518	2.73099e-05	TRUE	9.40081e-222	0.774946	0.258714	2.32125	8.95562	0.0622184
APOL1	3	Inverse variance weighted	0.124444	0.275074	0.650979	0.977779	0.0598164	0.709506	0.0305914	2.17374e-06	TRUE	3.26776e-214	1.13252	0.660538	1.94175	0.545126	0.761425
RARRES2	3	Inverse variance weighted	-0.186742	0.414522	0.65235	0.977779	-0.0151937	0.98202	0.0222711	8.29454e-07	TRUE	2.39721e-156	0.829658	0.368172	1.86959	0.083157	0.959274
NFASC	3	Inverse variance weighted	0.115744	0.257059	0.652521	0.977779	-0.189345	0.701465	0.04119	1.82645e-06	TRUE	8.26043e-291	1.12271	0.67835	1.85815	0.427266	0.807645
DKK1	5	Inverse variance weighted	-0.129952	0.288824	0.652758	0.977779	0.0469612	0.685539	0.037057	5.89543e-06	TRUE	4.8e-258	0.878138	0.498552	1.54673	1.83109	0.766789
USP15	2	Inverse variance weighted	1.30168	2.91821	0.655558	0.977779			0.00207179	1.446e-05	TRUE	9.9765e-14	3.67546	0.0120582	1120.32	4.16004	0.0413885
PF4V1	2	Inverse variance weighted	0.21816	0.490813	0.656691	0.977779			0.016625	7.52017e-07	TRUE	1.24435e-116	1.24379	0.475288	3.25487	0.0618261	0.803633
HS6ST1	2	Inverse variance weighted	0.266538	0.603889	0.658946	0.977779			0.0108965	8.67891e-07	TRUE	1.75175e-76	1.30544	0.399682	4.2638	0.10456	0.746425
EPHA2	3	Inverse variance weighted	-0.299706	0.679259	0.65905	0.977779	0.353917	0.472781	0.0101055	4.08812e-06	TRUE	1.75529e-69	0.741036	0.195723	2.80567	1.21544	0.544591
PGLYRP1	2	Inverse variance weighted	-0.237073	0.539759	0.660501	0.977779			0.0147201	1.65088e-06	TRUE	1.4109e-102	0.788933	0.273898	2.27244	0.376528	0.539467
SERPINA1	6	Inverse variance weighted	-0.117842	0.268584	0.660841	0.977779	-0.0416541	0.800581	0.0328575	1.55099e-05	TRUE	2.85938e-224	0.888837	0.525047	1.50468	5.15159	0.397662
COL2A1	7	Inverse variance weighted	-0.127312	0.291585	0.662385	0.977779	-0.0376639	0.817865	0.0616396	1.42827e-05	TRUE	0	0.880459	0.497172	1.55923	4.73597	0.578095
NRP1	3	Inverse variance weighted	0.225959	0.520119	0.663971	0.977779	0.17375	0.718294	0.029054	1.78026e-05	TRUE	7.86432e-197	1.25352	0.452271	3.4743	5.61122	0.0604698
GAA	6	Inverse variance weighted	0.126147	0.292494	0.666265	0.977779	0.0797863	0.476018	0.0385025	1.54196e-05	TRUE	2.25088e-264	1.13445	0.639454	2.01261	5.12799	0.40046
AKR7A3	5	Inverse variance weighted	-0.258666	0.599863	0.666317	0.977779	-0.201792	0.278307	0.025494	2.16725e-05	TRUE	5.10108e-171	0.772081	0.238259	2.50194	7.14353	0.128495
FAM20A	2	Inverse variance weighted	-0.270293	0.631649	0.668711	0.977779			0.0127648	5.87736e-06	TRUE	3.4064e-87	0.763156	0.22128	2.63198	1.71352	0.190529
SERPINF1	4	Inverse variance weighted	0.144575	0.339307	0.670043	0.977779	0.0311676	0.974452	0.0294845	1.06941e-05	TRUE	4.4935e-202	1.15555	0.594243	2.24705	3.47826	0.323592
B3GNT2	2	Inverse variance weighted	-0.224053	0.526118	0.67021	0.977779			0.0153177	5.34076e-07	TRUE	1.07826e-107	0.799273	0.285006	2.24149	0.00286482	0.957314
FAM3D	3	Inverse variance weighted	-0.126253	0.300636	0.674521	0.977779	0.0526654	0.662838	0.02884	2.30318e-06	TRUE	1.26541e-201	0.881392	0.488948	1.58882	0.618085	0.73415
ACP5	2	Inverse variance weighted	-0.186631	0.444929	0.674877	0.977779			0.01982	2.75963e-06	TRUE	1.41692e-137	0.829749	0.346909	1.98462	0.775937	0.378387
SAA1	4	Inverse variance weighted	0.132598	0.316228	0.674988	0.977779	0.106193	0.747343	0.0334109	2.38014e-06	TRUE	3.3032e-234	1.14179	0.614339	2.1221	0.645167	0.886019
CDNF	6	Inverse variance weighted	-0.166603	0.398209	0.675668	0.977779	-0.56885	0.0852876	0.0343352	3.59264e-05	TRUE	1.52893e-229	0.846535	0.387867	1.8476	11.9731	0.0351576
PLOD3	4	Inverse variance weighted	-0.370967	0.89032	0.676922	0.977779	-0.164447	0.698586	0.00731002	1.20552e-05	TRUE	1.18715e-48	0.690067	0.120513	3.95136	3.93081	0.269033
OLFM1	3	Inverse variance weighted	0.364227	0.87644	0.677721	0.977779	0.251013	0.795345	0.00705597	1.04609e-06	TRUE	9.93744e-50	1.4394	0.25831	8.02089	0.188127	0.910225
IGSF3	2	Inverse variance weighted	0.425286	1.02707	0.678818	0.977779			0.00556524	5.52164e-06	TRUE	4.30204e-38	1.53003	0.20438	11.4541	1.62584	0.20228
NIT2	2	Inverse variance weighted	0.824642	1.99509	0.679362	0.977779			0.00453105	1.81943e-05	TRUE	2.15282e-29	2.28106	0.045696	113.867	5.36009	0.0206027
CST6	3	Inverse variance weighted	-0.221724	0.537868	0.680173	0.977779	-0.00298845	0.990616	0.0120805	3.44441e-06	TRUE	2.45482e-83	0.801137	0.279167	2.29905	1.01816	0.601049
DUSP28	2	Inverse variance weighted	0.251067	0.611328	0.681299	0.977779			0.0147707	9.75348e-07	TRUE	1.99116e-103	1.2854	0.38785	4.26	0.167763	0.682107
ECM1	2	Inverse variance weighted	-0.38681	0.94862	0.683449	0.977779			0.0401003	3.38607e-05	TRUE	1.31614e-270	0.67922	0.10581	4.36006	10.0147	0.00155294
TREM2	6	Inverse variance weighted	-0.0950895	0.23387	0.684308	0.977779	0.123878	0.446227	0.0572991	1.1711e-05	TRUE	0	0.909292	0.574949	1.43806	3.8742	0.567666
SLIT2	2	Inverse variance weighted	-0.345471	0.855733	0.686424	0.977779			0.00542504	4.90612e-07	TRUE	8.4817e-39	0.707887	0.132297	3.78773	0.00624657	0.937005
CNTN5	3	Inverse variance weighted	-0.138285	0.342608	0.686489	0.977779	-0.0190286	0.865751	0.0256785	7.6047e-07	TRUE	1.32418e-180	0.870851	0.444949	1.70442	0.0994012	0.951514
TMEM132A	5	Inverse variance weighted	0.165287	0.410665	0.687326	0.977779	-0.153007	0.410471	0.0394556	2.41072e-05	TRUE	1.66959e-268	1.17973	0.527495	2.63845	7.99177	0.0918802
LPO	3	Inverse variance weighted	0.163024	0.406876	0.688661	0.977779	-0.0894657	0.582945	0.020337	2.3311e-06	TRUE	1.81797e-141	1.17706	0.530226	2.613	0.643538	0.724866
CRISP2	6	Inverse variance weighted	0.089941	0.225034	0.689394	0.977779	0.384687	0.237556	0.0875551	2.51792e-05	TRUE	0	1.09411	0.703896	1.70064	8.41626	0.134738
RGMA	3	Inverse variance weighted	-0.408989	1.02363	0.68949	0.977779	-0.183689	0.731796	0.00387237	1.63537e-06	TRUE	1.45724e-27	0.664321	0.0893398	4.93982	0.404461	0.816907
KRT1	3	Inverse variance weighted	0.408042	1.02408	0.6903	0.977779	0.651694		0.00623476	8.15865e-06	TRUE	4.28941e-42	1.50387	0.202068	11.1924	2.60724	0.271547
COMP	4	Inverse variance weighted	0.259613	0.653659	0.691243	0.977779	-0.22624	0.449104	0.0202308	1.62066e-05	TRUE	7.1723e-136	1.29643	0.360033	4.66826	5.31097	0.150392
CPNE1	6	Inverse variance weighted	-0.108365	0.273959	0.692436	0.977779	0.0870114	0.487634	0.0695761	1.02167e-05	TRUE	0	0.8973	0.524492	1.5351	3.36763	0.643505
DEFB1	3	Inverse variance weighted	-0.127561	0.323058	0.69295	0.977779	-0.124164	0.467879	0.0336745	4.55351e-06	TRUE	1.34869e-234	0.88024	0.467313	1.65804	1.41475	0.492936
FCRLB	4	Inverse variance weighted	-0.104846	0.265985	0.693448	0.977779	0.89516	0.652768	0.044014	1.76646e-06	TRUE	0	0.900463	0.534633	1.51662	0.453934	0.928889
LBP	4	Inverse variance weighted	-0.134958	0.343529	0.694425	0.977779	0.0169323	0.929549	0.0313299	5.05522e-06	TRUE	1.35706e-217	0.873753	0.445627	1.71319	1.58939	0.661797
KIRREL2	5	Inverse variance weighted	0.128473	0.327947	0.695243	0.977779	0.0184328	0.860409	0.0435894	6.99646e-07	TRUE	0	1.13709	0.597917	2.16247	0.0878632	0.999063
CXCL16	3	Inverse variance weighted	0.256746	0.657227	0.696056	0.977779	-0.270985	0.270634	0.0172166	1.80099e-05	TRUE	9.57011e-115	1.29272	0.3565	4.68756	5.77183	0.0558037
LRIG1	6	Inverse variance weighted	-0.127145	0.326487	0.696956	0.977779	0.13792	0.600681	0.0494014	5.30759e-06	TRUE	0	0.880606	0.464377	1.66991	1.67911	0.891521
ART3	4	Inverse variance weighted	-0.185613	0.478411	0.698032	0.977779	-0.0785937	0.685854	0.0253169	1.45867e-05	TRUE	1.35637e-171	0.830595	0.325206	2.12139	4.79104	0.187753
BCAN	2	Inverse variance weighted	0.307718	0.793769	0.698263	0.977779			0.00666863	1.87634e-06	TRUE	1.15223e-46	1.36032	0.287058	6.4463	0.496931	0.480852
C6	3	Inverse variance weighted	-0.177891	0.459548	0.698683	0.977779	0.415964	0.706663	0.0245945	2.88683e-06	TRUE	4.15243e-171	0.837034	0.34007	2.06024	0.84592	0.655105
BPI	9	Inverse variance weighted	0.111597	0.289575	0.699954	0.977779	-0.191854	0.437821	0.0617938	1.27323e-05	TRUE	0	1.11806	0.633833	1.97223	4.24328	0.834534
ESAM	4	Inverse variance weighted	-0.250385	0.653204	0.701484	0.977779	1.8577	0.151754	0.0197484	1.78379e-05	TRUE	3.62532e-132	0.778501	0.216392	2.80077	5.86568	0.118331
PLEK	2	Inverse variance weighted	-0.563145	1.47012	0.701675	0.977779			0.00812172	1.33497e-05	TRUE	6.82363e-54	0.569415	0.031918	10.1583	4.01556	0.0450822
AZGP1	2	Inverse variance weighted	-0.156115	0.408455	0.702308	0.977779			0.021374	2.81223e-06	TRUE	1.86028e-148	0.855461	0.384164	1.90495	0.823949	0.364028
SFTPD	6	Inverse variance weighted	-0.140318	0.367465	0.70257	0.977779	0.565133	0.310682	0.0391266	1.92887e-05	TRUE	1.4463e-267	0.869082	0.42293	1.78588	6.46483	0.263578
COLEC11	8	Inverse variance weighted	-0.121975	0.322176	0.704987	0.977779	-0.00536721	0.970474	0.0318349	1.46548e-05	TRUE	2.55265e-217	0.885171	0.470745	1.66444	4.91161	0.670749
RSPO4	2	Inverse variance weighted	-0.42975	1.13849	0.705821	0.977779			0.00553931	4.13198e-07	TRUE	1.19712e-39	0.650672	0.0698656	6.05984	3.86013e-05	0.995043
PRCP	3	Inverse variance weighted	-0.231822	0.614369	0.705926	0.977779	0.369013	0.372589	0.0142553	7.986e-06	TRUE	8.03675e-97	0.793088	0.237881	2.64413	2.57157	0.276433
CPOX	4	Inverse variance weighted	-0.323234	0.864225	0.708392	0.977779	0.0179956	0.971997	0.00693824	9.21156e-06	TRUE	1.21195e-46	0.723805	0.133039	3.9379	3.03582	0.386136
MFAP4	2	Inverse variance weighted	-0.369286	0.999887	0.711884	0.977779			0.0177834	1.22746e-05	TRUE	5.81143e-120	0.691228	0.0973868	4.90617	3.72575	0.0535795
NPTXR	5	Inverse variance weighted	-0.0592078	0.160334	0.711921	0.977779	-0.000500491	0.998672	0.0426549	9.27198e-06	TRUE	1.33963e-296	0.942511	0.688347	1.29052	3.06186	0.547527
CCL3	10	Inverse variance weighted	0.0985055	0.270808	0.716047	0.977779	0.00156967	0.991312	0.0372173	2.91223e-06	TRUE	4.02787e-261	1.10352	0.649029	1.87628	0.872214	0.99968
CD5L	4	Inverse variance weighted	-0.110684	0.306384	0.717907	0.977779	-0.252304	0.809024	0.0311272	3.55329e-06	TRUE	4.89756e-217	0.895222	0.491056	1.63204	1.09514	0.778247
LGALS3	3	Inverse variance weighted	0.143676	0.399701	0.719252	0.977779	-0.2544	0.367655	0.0281388	9.94246e-06	TRUE	7.31393e-193	1.15451	0.52743	2.52714	3.22139	0.199749
DKK3	4	Inverse variance weighted	0.100682	0.280752	0.719882	0.977779	-0.0743655	0.6275	0.0306472	4.13269e-06	TRUE	2.93231e-213	1.10593	0.637889	1.91737	1.2969	0.729869
PCDH10	2	Inverse variance weighted	0.229371	0.643643	0.721569	0.977779			0.00935816	7.60244e-07	TRUE	7.18693e-66	1.25781	0.356233	4.44113	0.135238	0.713061
AGRP	3	Inverse variance weighted	0.154755	0.434772	0.721881	0.977779	0.198759	0.716246	0.0218576	1.11475e-06	TRUE	3.9978e-153	1.16737	0.497879	2.73712	0.257815	0.879055
CRTAC1	6	Inverse variance weighted	-0.0861343	0.243001	0.722994	0.977779	0.0647107	0.822525	0.0384697	5.71092e-06	TRUE	2.72719e-268	0.917471	0.56983	1.4772	1.84424	0.87025
PSG4	7	Inverse variance weighted	0.0564319	0.159286	0.723129	0.977779	-0.0963482	0.41053	0.0662714	1.73695e-05	TRUE	0	1.05805	0.774321	1.44576	5.86579	0.438392
PLA2R1	7	Inverse variance weighted	-0.0754059	0.213225	0.723606	0.977779	0.0888224	0.827004	0.0656684	1.7744e-05	TRUE	0	0.927367	0.610591	1.40849	5.99547	0.423698
PIP	3	Inverse variance weighted	-0.0945869	0.267617	0.723757	0.977779	0.258015	0.365627	0.0391699	7.4159e-06	TRUE	2.05031e-272	0.909749	0.538421	1.53717	2.40762	0.300049
IL1RL2	2	Inverse variance weighted	0.219361	0.622127	0.72439	0.977779			0.0116869	3.77463e-06	TRUE	1.72927e-80	1.24528	0.367876	4.21534	1.15803	0.281875
TREML2	8	Inverse variance weighted	-0.0892958	0.253818	0.724981	0.977779	0.0215079	0.86242	0.0529898	1.48972e-05	TRUE	0	0.914575	0.556115	1.50409	5.01477	0.658161
CALCB	2	Inverse variance weighted	-0.387247	1.10133	0.725124	0.977779			0.0238304	1.88736e-05	TRUE	3.90236e-160	0.678923	0.0784063	5.87882	5.79387	0.0160822
DAPK2	3	Inverse variance weighted	-0.123174	0.350849	0.725532	0.977779	0.0627942	0.714984	0.0283471	2.87614e-06	TRUE	1.05735e-197	0.88411	0.444485	1.75855	0.86883	0.647644
MANSC4	4	Inverse variance weighted	-0.10877	0.310556	0.726156	0.977779	-0.189909	0.454496	0.0314024	7.49623e-06	TRUE	6.47209e-217	0.896937	0.487991	1.64859	2.46303	0.48201
PDIA5	6	Inverse variance weighted	-0.0947294	0.27062	0.726304	0.977779	-0.488503	0.108299	0.0374185	1.54194e-05	TRUE	1.19526e-256	0.909619	0.535184	1.54602	5.19145	0.392965
LYVE1	5	Inverse variance weighted	-0.138777	0.396998	0.726665	0.977779	0.664025	0.233033	0.0221127	1.48004e-05	TRUE	3.04029e-149	0.870422	0.39976	1.89523	4.95384	0.292067
MSR1	4	Inverse variance weighted	-0.171545	0.491789	0.727225	0.977779	-0.220635	0.51838	0.0198971	2.16445e-06	TRUE	1.74318e-138	0.842362	0.321277	2.20861	0.624916	0.890705
CTSD	3	Inverse variance weighted	-0.190995	0.549521	0.728166	0.977779	0.360448	0.395456	0.0238367	8.11101e-06	TRUE	2.53265e-163	0.826137	0.281378	2.42557	2.6384	0.267349
PDGFRB	7	Inverse variance weighted	0.049972	0.143888	0.728367	0.977779	0.0599336	0.69725	0.0742375	1.40838e-05	TRUE	0	1.05124	0.792908	1.39374	4.73737	0.577911
NRXN3	17	Inverse variance weighted	-0.059531	0.171809	0.728971	0.977779	0.846591	0.550607	0.158424	1.47665e-06	TRUE	0	0.942206	0.67282	1.31945	0.38929	1
TDGF1	5	Inverse variance weighted	0.0272798	0.0787408	0.729005	0.977779	-0.206113	0.438669	0.058155	1.00971e-05	TRUE	0	1.02766	0.880688	1.19915	3.36281	0.499042
PTN	3	Inverse variance weighted	0.18264	0.527432	0.729132	0.977779	-0.711539	0.590172	0.0194725	8.99955e-06	TRUE	1.39179e-132	1.20038	0.426933	3.37504	2.92867	0.231232
FUT3	9	Inverse variance weighted	-0.0676569	0.195833	0.729732	0.977779	-0.0351693	0.887621	0.0715975	5.76632e-06	TRUE	0	0.934581	0.636679	1.37187	1.86964	0.984751
PNLIP	2	Inverse variance weighted	0.405435	1.17429	0.729898	0.977779			0.00316574	5.93546e-06	TRUE	7.57236e-22	1.49996	0.150143	14.9848	1.82928	0.176212
SELPLG	3	Inverse variance weighted	-0.12849	0.374228	0.731338	0.977779	0.276237	0.690292	0.0241745	6.26673e-06	TRUE	2.01182e-166	0.879422	0.422326	1.83125	2.04129	0.360363
ARL3	2	Inverse variance weighted	-0.251794	0.734498	0.731741	0.977779			0.0101814	3.53913e-07	TRUE	5.60132e-72	0.777405	0.18426	3.27993	0.00455637	0.946183
FKBP7	4	Inverse variance weighted	0.129856	0.379219	0.732026	0.977779	0.188714	0.684762	0.0320517	1.3459e-06	TRUE	1.992e-225	1.13866	0.5415	2.39438	0.346985	0.950963
ESD	2	Inverse variance weighted	-0.291255	0.862029	0.73546	0.977779			0.0210446	8.80576e-06	TRUE	1.40896e-143	0.747325	0.137954	4.0484	2.72618	0.0987154
HLA-DQA2	3	Inverse variance weighted	0.302256	0.898047	0.736441	0.977779	-0.0545297	0.936683	0.00440385	1.10066e-06	TRUE	2.05538e-31	1.35291	0.232721	7.86504	0.266376	0.875301
CBR1	3	Inverse variance weighted	0.300082	0.899683	0.738726	0.977779	0.254637	0.357992	0.0283773	1.94109e-05	TRUE	1.15374e-191	1.34997	0.231472	7.87317	6.34264	0.0419481
ITIH1	3	Inverse variance weighted	0.303416	0.915019	0.740195	0.977779	0.0255848	0.956942	0.00664097	2.02561e-06	TRUE	2.04772e-46	1.35448	0.225368	8.14052	0.58875	0.744997
TCL1A	2	Inverse variance weighted	0.160926	0.488794	0.741981	0.977779			0.0145875	1.69055e-06	TRUE	1.25951e-101	1.1746	0.45063	3.06167	0.474735	0.490817
NRP2	5	Inverse variance weighted	-0.151123	0.46275	0.743988	0.977779	0.127272	0.598734	0.0131368	6.91515e-06	TRUE	1.9465e-89	0.859742	0.34711	2.12946	2.27862	0.684665
DSC2	2	Inverse variance weighted	0.210333	0.646312	0.744852	0.977779			0.0111127	1.7322e-06	TRUE	1.97466e-77	1.23409	0.347692	4.38025	0.491583	0.483222
TREM1	4	Inverse variance weighted	0.14239	0.438483	0.745382	0.977779	-0.130375	0.498341	0.0338652	1.77586e-05	TRUE	1.0579e-230	1.15303	0.488197	2.72323	5.91757	0.11569
GREM1	8	Inverse variance weighted	0.0512056	0.15783	0.745608	0.977779	-0.340791	0.351907	0.0448724	1.30613e-05	TRUE	0	1.05254	0.772487	1.43412	4.40003	0.73272
FAM171B	2	Inverse variance weighted	-0.203619	0.627684	0.745637	0.977779			0.00937822	3.81585e-07	TRUE	2.38723e-66	0.815773	0.238382	2.79167	0.0263889	0.870954
ICAM1	9	Inverse variance weighted	0.0685748	0.212915	0.747395	0.977779	0.206623	0.744315	0.094537	2.7074e-05	TRUE	0	1.07098	0.705578	1.62562	9.21922	0.324142
NLGN2	2	Inverse variance weighted	0.236503	0.73982	0.749214	0.977779			0.00692541	3.43019e-07	TRUE	2.5062e-49	1.26681	0.297142	5.40082	0.0161262	0.898949
SLITRK3	3	Inverse variance weighted	-0.0902538	0.282734	0.749561	0.977779	-0.696268	0.499361	0.028452	3.80618e-06	TRUE	7.45473e-198	0.913699	0.524971	1.59027	1.21098	0.545806
B4GALT1	2	Inverse variance weighted	-0.231434	0.727862	0.750512	0.977779			0.00768566	2.31697e-06	TRUE	1.74786e-53	0.793395	0.190511	3.30414	0.698102	0.403422
SEZ6L	3	Inverse variance weighted	-0.329384	1.0363	0.750602	0.977779	1.00583	0.736919	0.00728508	1.02947e-06	TRUE	2.53524e-51	0.719367	0.0943693	5.48365	0.254074	0.880701
METTL24	2	Inverse variance weighted	0.178142	0.568015	0.753809	0.977779			0.00796139	4.09e-06	TRUE	8.97571e-55	1.19499	0.39252	3.63807	1.28444	0.257075
ANGPTL1	3	Inverse variance weighted	-0.105871	0.340794	0.756059	0.977779	-0.00345147	0.985535	0.0323529	4.11163e-06	TRUE	1.99482e-225	0.899541	0.461244	1.75433	1.32173	0.516404
APOM	2	Inverse variance weighted	-0.651297	2.10154	0.756626	0.977779			0.00304114	8.64773e-06	TRUE	1.21144e-20	0.521369	0.00847774	32.0635	2.72151	0.0990044
TAC1	3	Inverse variance weighted	0.126707	0.412647	0.758798	0.977779	-0.124521	0.718812	0.0160827	1.18471e-06	TRUE	1.94225e-112	1.13508	0.505564	2.54847	0.314362	0.854549
GLCE	6	Inverse variance weighted	0.129519	0.423202	0.759571	0.977779	-0.0627753	0.69613	0.0497738	3.33937e-05	TRUE	0	1.13828	0.496607	2.60907	11.3068	0.0456256
PXDN	3	Inverse variance weighted	0.219895	0.722949	0.761003	0.977779	0.00240025	0.996581	0.00933731	7.80093e-06	TRUE	3.39751e-63	1.24595	0.302074	5.13908	2.57185	0.276395
TNFRSF11B	3	Inverse variance weighted	-0.170969	0.566178	0.762675	0.977779	0.105469	0.7757	0.0135667	6.62838e-06	TRUE	1.7541e-92	0.842848	0.277849	2.55676	2.18667	0.335098
THBS2	6	Inverse variance weighted	0.132244	0.438019	0.762718	0.977779	0.414384	0.0425733	0.0402058	3.4479e-05	TRUE	3.27926e-271	1.14139	0.483708	2.69328	11.6801	0.0394442
SPP1	3	Inverse variance weighted	0.485532	1.60929	0.762876	0.977779	0.597803	0.256938	0.00463185	1.68805e-05	TRUE	3.4094e-30	1.62504	0.0693444	38.0817	5.56915	0.0617553
SERPINE1	2	Inverse variance weighted	-0.374231	1.2411	0.763008	0.977779			0.00287894	4.46987e-07	TRUE	3.25513e-21	0.687818	0.0603992	7.83278	0.0632592	0.801417
LGALS3BP	2	Inverse variance weighted	-0.17987	0.602507	0.765295	0.977779			0.0116933	3.80267e-07	TRUE	1.67961e-82	0.835379	0.25646	2.72112	0.042043	0.837538
BDNF	2	Inverse variance weighted	0.271541	0.91023	0.765458	0.977779			0.00380529	1.4431e-06	TRUE	3.61094e-27	1.31198	0.220356	7.81145	0.40878	0.522589
CST2	4	Inverse variance weighted	-0.0660133	0.221437	0.765617	0.977779	0.19476	0.367736	0.0634225	6.47407e-06	TRUE	0	0.936118	0.606512	1.44485	2.14425	0.543013
LILRB1	8	Inverse variance weighted	-0.0461062	0.155027	0.766156	0.977779	0.0594552	0.552131	0.0698791	1.4624e-05	TRUE	0	0.954941	0.704717	1.29401	4.95585	0.665351
GP5	2	Inverse variance weighted	0.351137	1.18616	0.767209	0.977779			0.00532912	5.8184e-06	TRUE	1.96516e-36	1.42068	0.138937	14.527	1.84526	0.174335
MAPK12	2	Inverse variance weighted	0.128486	0.43824	0.769379	0.977779			0.0204499	2.02369e-06	TRUE	1.82335e-142	1.13711	0.481685	2.68435	0.612088	0.434003
SERPINA5	5	Inverse variance weighted	-0.124403	0.425391	0.769947	0.977779	-0.620571	0.136048	0.0208925	1.25801e-05	TRUE	2.22525e-141	0.883024	0.383594	2.0327	4.24848	0.373421
NID2	4	Inverse variance weighted	-0.0772231	0.264243	0.770101	0.977779	0.41745	0.472306	0.0419927	5.04706e-06	TRUE	4.34223e-294	0.925683	0.551485	1.55378	1.6555	0.646872
THBS3	4	Inverse variance weighted	-0.268266	0.920448	0.770706	0.977779	-0.820057	0.420635	0.00828034	3.56843e-06	TRUE	4.02353e-57	0.764704	0.12589	4.6451	1.14593	0.766001
PPID	2	Inverse variance weighted	-0.116429	0.40034	0.771184	0.977779			0.0260037	2.52982e-07	TRUE	9.60294e-184	0.890093	0.406124	1.95079	0.00268103	0.958705
ITLN1	2	Inverse variance weighted	0.380502	1.31136	0.771695	0.977779			0.0040112	1.51977e-06	TRUE	1.48836e-28	1.46302	0.111943	19.1206	0.44003	0.507108
OBP2B	6	Inverse variance weighted	0.162245	0.571405	0.776456	0.977779	0.130467	0.729984	0.0160253	1.92076e-05	TRUE	2.30648e-106	1.17615	0.383771	3.60455	6.52022	0.258836
MGP	3	Inverse variance weighted	0.115818	0.410285	0.777724	0.977779	-0.0284846	0.868675	0.0269791	6.16549e-07	TRUE	4.6118e-190	1.12279	0.502409	2.50923	0.132983	0.935671
KIR2DL3	7	Inverse variance weighted	-0.103641	0.367521	0.777943	0.977779	0.221421	0.421653	0.0344001	2.02696e-05	TRUE	9.37266e-234	0.901549	0.438681	1.8528	6.90024	0.330172
HAVCR1	3	Inverse variance weighted	-0.134256	0.477394	0.778537	0.977779	-0.131688	0.605458	0.0334084	1.20354e-05	TRUE	2.44939e-229	0.874366	0.343026	2.22874	3.99353	0.135773
IL27RA	8	Inverse variance weighted	-0.063462	0.227104	0.779907	0.977779	0.433624	0.187998	0.0727155	3.10055e-05	TRUE	0	0.93851	0.601346	1.46472	10.5769	0.158167
SWAP70	4	Inverse variance weighted	-0.0796161	0.285172	0.780102	0.977779	0.162379	0.309568	0.0376089	7.87169e-06	TRUE	5.4042e-261	0.923471	0.528056	1.61498	2.63726	0.450994
NCAM1	3	Inverse variance weighted	0.113125	0.405518	0.780272	0.977779	-0.0379396	0.942931	0.0448212	1.36073e-05	TRUE	0	1.11977	0.505761	2.47921	4.51787	0.104462
PLAT	4	Inverse variance weighted	0.198856	0.715572	0.78109	0.977779	0.0643598	0.681286	0.0230234	5.11906e-06	TRUE	7.57631e-159	1.22001	0.300092	4.95986	1.68851	0.63949
EBI3	8	Inverse variance weighted	0.0353576	0.127306	0.781214	0.977779	-0.0660433	0.306283	0.0544472	2.39719e-05	TRUE	0	1.03599	0.807218	1.3296	8.17862	0.317108
QPCT	4	Inverse variance weighted	-0.106299	0.382995	0.78136	0.977779	-0.551872	0.273359	0.024833	7.90018e-06	TRUE	2.1855e-170	0.899155	0.424447	1.90479	2.648	0.449136
SCGB3A1	2	Inverse variance weighted	0.178874	0.659277	0.786146	0.977779			0.00995846	1.45638e-06	TRUE	1.39214e-69	1.19587	0.32847	4.35384	0.428741	0.512607
PLXNC1	7	Inverse variance weighted	0.0619542	0.228536	0.78632	0.977779	0.021345	0.901421	0.0661225	1.00506e-05	TRUE	0	1.06391	0.679787	1.6651	3.39332	0.758105
THSD1	4	Inverse variance weighted	0.114029	0.420707	0.78636	0.977779	-0.0504548	0.752893	0.0333013	2.08755e-06	TRUE	1.13847e-233	1.12078	0.49137	2.55644	0.646603	0.885686
POFUT1	3	Inverse variance weighted	0.0881453	0.326135	0.786951	0.977779	-0.0794203	0.769188	0.0297784	9.22455e-07	TRUE	1.21703e-209	1.09215	0.576327	2.06963	0.245138	0.884645
QSOX2	5	Inverse variance weighted	0.106563	0.396479	0.788104	0.977779	-2.13465	0.0937137	0.033253	2.53064e-05	TRUE	2.37627e-224	1.11245	0.511434	2.41975	8.57422	0.0726691
PNP	2	Inverse variance weighted	-0.276542	1.0309	0.788505	0.977779			0.00817349	7.14669e-06	TRUE	1.9843e-55	0.758402	0.100549	5.72031	2.29966	0.129403
CMBL	2	Inverse variance weighted	-0.158321	0.595694	0.790412	0.977779			0.010895	7.68695e-07	TRUE	1.49626e-76	0.853576	0.265569	2.74352	0.194512	0.659188
DPEP1	5	Inverse variance weighted	-0.071281	0.268605	0.790721	0.977779	0.444507	0.444608	0.0421173	6.43738e-06	TRUE	3.64938e-294	0.9312	0.550049	1.57647	2.15005	0.708184
CYB5D2	2	Inverse variance weighted	-0.13944	0.525699	0.790819	0.977779			0.0271843	6.78623e-06	TRUE	2.19528e-187	0.869845	0.310426	2.4374	2.18693	0.139186
GMPR2	3	Inverse variance weighted	0.111215	0.423732	0.792963	0.977779	-0.0112748	0.954617	0.0258776	2.19697e-07	TRUE	6.37734e-183	1.11764	0.487093	2.56441	0.00689341	0.996559
F10	48	Inverse variance weighted	0.0359523	0.137026	0.793032	0.977779	0.141073	0.288407	0.132208	8.34115e-06	TRUE	0	1.03661	0.792456	1.35598	2.8083	1
RNASE4	4	Inverse variance weighted	0.0910775	0.348017	0.793549	0.977779	-0.147646	0.292904	0.0307112	1.32655e-05	TRUE	7.67262e-210	1.09535	0.553754	2.16667	4.4736	0.214657
FTCD	3	Inverse variance weighted	0.238045	0.911342	0.793936	0.977779	-0.270448	0.307592	0.0140954	1.15926e-05	TRUE	8.62142e-95	1.26877	0.212634	7.57062	3.86678	0.144657
THG1L	3	Inverse variance weighted	-0.125931	0.482982	0.794296	0.977779	0.023482	0.949181	0.0300848	1.12507e-05	TRUE	4.13535e-206	0.881676	0.342126	2.27212	3.75321	0.153109
REG3G	10	Inverse variance weighted	0.0596097	0.230805	0.7962	0.977779	0.224507	0.312689	0.0460466	1.86625e-05	TRUE	0	1.06142	0.675185	1.66861	6.37063	0.702327
CDON	3	Inverse variance weighted	0.0546759	0.212497	0.796946	0.977779	0.0359939	0.946141	0.028992	2.45011e-06	TRUE	1.35451e-202	1.0562	0.696409	1.60187	0.778922	0.677422
SMPD1	2	Inverse variance weighted	0.0805906	0.313253	0.79697	0.977779			0.0270965	2.02749e-07	TRUE	1.15221e-191	1.08393	0.586616	2.00284	0.00374693	0.95119
MPPED2	2	Inverse variance weighted	0.204523	0.796086	0.797248	0.977779			0.00760127	2.62759e-07	TRUE	4.11574e-54	1.22694	0.25774	5.8407	0.0246308	0.87529
SAR1A	2	Inverse variance weighted	-0.160829	0.626677	0.797459	0.977779			0.0102541	1.99325e-06	TRUE	2.39474e-71	0.851438	0.249296	2.90798	0.62168	0.430424
SERPINA4	8	Inverse variance weighted	-0.0785025	0.306609	0.797924	0.977779	-0.0265717	0.871581	0.0470268	3.58368e-05	TRUE	0	0.9245	0.506892	1.68616	12.2467	0.092733
IGDCC4	6	Inverse variance weighted	0.0661732	0.260085	0.799164	0.977779	0.131644	0.398556	0.0571719	7.43448e-06	TRUE	0	1.06841	0.641726	1.7788	2.49967	0.776544
BCHE	8	Inverse variance weighted	0.0999174	0.395242	0.800422	0.977779	-0.585875	0.117522	0.0198848	1.88548e-05	TRUE	7.01041e-133	1.10508	0.50928	2.3979	6.43973	0.489441
MIA	5	Inverse variance weighted	0.0512686	0.20418	0.801741	0.977779	0.00783302	0.958407	0.0477629	7.8321e-06	TRUE	0	1.05261	0.705446	1.57061	2.63851	0.620016
PDCD1LG2	6	Inverse variance weighted	-0.105584	0.435194	0.808305	0.977779	-0.427467	0.347279	0.0361783	2.57105e-05	TRUE	7.38978e-245	0.899799	0.383443	2.1115	8.76527	0.118801
EPHB6	2	Inverse variance weighted	-0.257456	1.06362	0.808736	0.977779			0.0182207	1.49231e-05	TRUE	2.53883e-122	0.773016	0.0961216	6.21664	4.86261	0.0274447
PDGFRA	2	Inverse variance weighted	-0.198689	0.824416	0.809551	0.977779			0.00603372	2.18428e-06	TRUE	3.46927e-42	0.819805	0.162912	4.12542	0.695342	0.404353
BST1	9	Inverse variance weighted	0.0539166	0.224551	0.810246	0.977779	-0.0471879	0.778412	0.0768182	1.08114e-05	TRUE	0	1.0554	0.679632	1.63892	3.67156	0.885475
CACNA2D3	5	Inverse variance weighted	-0.0900114	0.376192	0.810896	0.977779	-0.0142119	0.943464	0.0322066	1.30053e-05	TRUE	1.73167e-220	0.913921	0.437208	1.91042	4.42268	0.351814
SPINK4	2	Inverse variance weighted	-0.110553	0.464704	0.811958	0.977779			0.0189139	6.20139e-07	TRUE	7.00178e-133	0.895339	0.3601	2.22613	0.15731	0.691646
PPIC	5	Inverse variance weighted	-0.0793982	0.335747	0.813058	0.977779	-0.19967	0.534529	0.0365239	5.86979e-06	TRUE	3.08065e-254	0.923672	0.478327	1.78366	1.96877	0.741503
ENGASE	7	Inverse variance weighted	0.0504054	0.215718	0.815246	0.977779	0.318667	0.549097	0.0966105	1.0347e-05	TRUE	0	1.0517	0.689077	1.60514	3.51444	0.742048
ADAMTS13	9	Inverse variance weighted	0.0653149	0.2797	0.815359	0.977779	0.0518095	0.824024	0.0512627	7.60817e-06	TRUE	0	1.0675	0.616994	1.84693	2.56978	0.958397
FCRL3	5	Inverse variance weighted	0.0925979	0.39682	0.81549	0.977779	-0.330627	0.218587	0.0320157	1.70244e-05	TRUE	7.22546e-218	1.09702	0.504005	2.38778	5.79345	0.215113
DPT	6	Inverse variance weighted	0.0587613	0.25527	0.817942	0.977779	0.253161	0.456128	0.0384025	1.02368e-05	TRUE	1.28182e-265	1.06052	0.643028	1.74908	3.47804	0.626713
NCR1	2	Inverse variance weighted	-0.150311	0.655506	0.818631	0.977779			0.0122533	3.35233e-06	TRUE	1.43853e-84	0.86044	0.238091	3.10956	1.09857	0.29458
FLRT3	4	Inverse variance weighted	0.0486378	0.214827	0.820886	0.977779	-0.0062854	0.969141	0.0834348	4.96835e-06	TRUE	0	1.04984	0.689063	1.59951	1.66249	0.645305
LRPAP1	4	Inverse variance weighted	0.148317	0.662652	0.822894	0.977779	-0.332344	0.367707	0.0156013	1.92389e-05	TRUE	1.81815e-103	1.15988	0.316484	4.25084	6.52717	0.0885972
ITIH3	6	Inverse variance weighted	0.0907511	0.406858	0.823494	0.977779	0.20866	0.364934	0.0238404	1.243e-05	TRUE	6.3844e-162	1.095	0.493274	2.43073	4.23777	0.515715
SAA2	3	Inverse variance weighted	0.0631674	0.284245	0.824136	0.977779	0.173831	0.38728	0.0317353	7.28261e-06	TRUE	2.2463e-219	1.06521	0.61021	1.85946	2.45148	0.293541
CRABP2	3	Inverse variance weighted	-0.0726966	0.329935	0.82561	0.977779	-0.0871917	0.659219	0.0277969	1.21325e-06	TRUE	3.64282e-195	0.929883	0.487059	1.77531	0.369943	0.831128
RBM17	2	Inverse variance weighted	0.0996397	0.452543	0.825733	0.977779			0.0163352	3.68047e-06	TRUE	9.48855e-113	1.10477	0.455052	2.68216	1.21082	0.271171
GZMA	3	Inverse variance weighted	-0.125862	0.574199	0.826497	0.977779	-0.426264	0.524139	0.0246367	4.75839e-06	TRUE	2.30376e-170	0.881736	0.286135	2.71711	1.59329	0.45084
OPCML	3	Inverse variance weighted	-0.331716	1.51473	0.826655	0.977779	0.392559	0.6723	0.00650493	2.44335e-05	TRUE	1.0886e-41	0.717691	0.0368616	13.9733	8.23057	0.0163213
CST7	6	Inverse variance weighted	-0.0735533	0.337818	0.827639	0.977779	0.300042	0.109261	0.0702966	2.38656e-05	TRUE	0	0.929087	0.479181	1.80141	8.15477	0.147909
HGD	2	Inverse variance weighted	-0.274608	1.27021	0.828839	0.977779			0.00644046	7.42621e-06	TRUE	1.26986e-43	0.75987	0.0630252	9.16146	2.44718	0.117736
SCARF1	4	Inverse variance weighted	0.0793237	0.368183	0.829419	0.977779	0.255968	0.428215	0.0304841	3.23878e-06	TRUE	1.16368e-212	1.08255	0.526073	2.22768	1.07075	0.78414
IL6R	7	Inverse variance weighted	-0.0341877	0.158819	0.829563	0.977779	-0.496751	0.311841	0.0603188	1.7943e-05	TRUE	0	0.96639	0.707886	1.31929	6.1417	0.407505
CBLN1	7	Inverse variance weighted	0.111114	0.520191	0.830857	0.977779	0.138548	0.757768	0.0296615	1.78097e-05	TRUE	4.34528e-201	1.11752	0.403145	3.09779	6.09682	0.412432
CD300C	5	Inverse variance weighted	0.14614	0.68587	0.831271	0.977779	-1.90474	0.0953913	0.0359686	3.52402e-05	TRUE	3.7975e-241	1.15736	0.301747	4.43907	12.0192	0.0172092
CTSH	9	Inverse variance weighted	-0.0503833	0.23677	0.831487	0.977779	0.165982	0.520677	0.0721097	2.88987e-05	TRUE	0	0.950865	0.597828	1.51238	9.91205	0.271253
CTSE	3	Inverse variance weighted	0.225217	1.05877	0.831548	0.977779	-0.735548	0.343611	0.00442807	9.16446e-06	TRUE	8.37221e-30	1.25259	0.157243	9.97815	3.09121	0.213183
CNTFR	3	Inverse variance weighted	0.0728643	0.343407	0.831966	0.977779	-0.0851445	0.827981	0.022802	3.5385e-07	TRUE	9.12504e-161	1.07558	0.548695	2.10842	0.0770343	0.962215
DNAJB4	2	Inverse variance weighted	0.190196	0.897634	0.832196	0.977779			0.0120154	7.59423e-06	TRUE	1.51919e-81	1.20949	0.208219	7.02559	2.50696	0.113345
ARFIP1	2	Inverse variance weighted	0.121625	0.577226	0.833117	0.977779			0.0209323	5.78645e-06	TRUE	6.60911e-144	1.12933	0.364314	3.50079	1.9111	0.166842
DSCAM	2	Inverse variance weighted	0.119065	0.566533	0.833539	0.977779			0.0117274	8.90121e-07	TRUE	2.98485e-82	1.12644	0.371079	3.41942	0.262863	0.60816
PCYOX1	4	Inverse variance weighted	-0.0770684	0.368794	0.834469	0.977779	0.130746	0.546068	0.040517	1.48393e-05	TRUE	5.68454e-279	0.925827	0.449372	1.90745	5.0451	0.168524
LEPR	8	Inverse variance weighted	-0.0286069	0.137308	0.834962	0.977779	0.0640864	0.56161	0.101818	3.43866e-06	TRUE	0	0.971798	0.742502	1.27191	1.1427	0.992187
LRP4	3	Inverse variance weighted	0.0654963	0.316024	0.835814	0.977779	0.396806	0.863335	0.0325605	6.13431e-07	TRUE	5.09274e-230	1.06769	0.574698	1.98358	0.16864	0.919137
SELP	2	Inverse variance weighted	0.094226	0.457373	0.836779	0.977779			0.0104844	3.45558e-06	TRUE	2.57459e-72	1.09881	0.44833	2.69306	1.14342	0.284931
FGFR1	2	Inverse variance weighted	-0.180331	0.875446	0.8368	0.977779			0.00459305	1.15217e-06	TRUE	1.08022e-32	0.834994	0.150137	4.64384	0.354994	0.5513
VIT	5	Inverse variance weighted	0.0803125	0.390626	0.837104	0.977779	0.36093	0.638888	0.0372227	1.9038e-05	TRUE	4.20402e-254	1.08363	0.503932	2.33017	6.49821	0.164903
PIANP	16	Inverse variance weighted	0.0413264	0.201824	0.837756	0.977779	0.00543227	0.992352	0.104689	1.21831e-07	TRUE	0	1.04219	0.701701	1.5479	9.52212e-05	1
IL18R1	7	Inverse variance weighted	-0.0402621	0.196689	0.837807	0.977779	0.141628	0.641819	0.077042	1.39891e-05	TRUE	0	0.960538	0.653265	1.41234	4.78343	0.571875
CYB5R2	3	Inverse variance weighted	0.0950526	0.472437	0.840545	0.977779	-0.128469	0.805421	0.0255094	9.13196e-06	TRUE	1.12532e-174	1.09972	0.435646	2.77605	3.08744	0.213585
PSMB1	2	Inverse variance weighted	-0.118332	0.589122	0.840807	0.977779			0.0272707	6.96836e-06	TRUE	6.47128e-188	0.888401	0.279988	2.8189	2.31041	0.12851
ADAM23	8	Inverse variance weighted	-0.0536767	0.268631	0.841624	0.977779	0.0763832	0.677855	0.0526592	1.1719e-05	TRUE	0	0.947738	0.55979	1.60454	4.00233	0.779509
CBLN4	4	Inverse variance weighted	-0.0754863	0.378641	0.84198	0.977779	3.78597	0.266339	0.0245888	8.3399e-06	TRUE	1.65282e-168	0.927292	0.44148	1.9477	2.83698	0.417448
NT5C2	2	Inverse variance weighted	0.164991	0.829406	0.842321	0.977779			0.00617795	3.27263e-06	TRUE	8.03363e-43	1.17938	0.232086	5.99321	1.08587	0.297389
NTRK3	3	Inverse variance weighted	-0.187527	0.956629	0.844587	0.977779	-0.333312	0.25694	0.0117456	1.62332e-05	TRUE	7.72272e-78	0.829006	0.127133	5.40577	5.49382	0.0641256
ART4	6	Inverse variance weighted	0.0418633	0.214765	0.845451	0.977779	0.0238133	0.881304	0.0704476	7.51957e-06	TRUE	0	1.04275	0.684493	1.58852	2.55575	0.768076
SPINT3	2	Inverse variance weighted	0.0802613	0.412714	0.845806	0.977779			0.0286801	4.67113e-06	TRUE	5.55019e-199	1.08357	0.482556	2.43313	1.55251	0.212765
CXCL6	4	Inverse variance weighted	0.0393236	0.202307	0.845882	0.977779	-0.0650217	0.671432	0.0353435	4.95904e-06	TRUE	2.6944e-246	1.04011	0.699634	1.54627	1.67276	0.643007
IFNLR1	2	Inverse variance weighted	-0.205417	1.06342	0.846829	0.977779			0.00380497	1.77792e-06	TRUE	4.68837e-27	0.814307	0.101294	6.54624	0.575951	0.447904
FCGR2B	10	Inverse variance weighted	0.0455714	0.240334	0.849609	0.977779	-0.249713	0.109574	0.0931297	5.51316e-05	TRUE	0	1.04663	0.653454	1.67636	18.9412	0.0256977
GLRX2	4	Inverse variance weighted	0.121373	0.640205	0.849634	0.977779	0.113749	0.770297	0.0309878	5.46921e-06	TRUE	6.08946e-215	1.12905	0.321928	3.95972	1.85058	0.603991
CXCL12	2	Inverse variance weighted	0.186295	0.98439	0.849898	0.977779			0.00845055	6.54208e-06	TRUE	1.86348e-57	1.20478	0.174976	8.29538	2.17855	0.139947
REG4	4	Inverse variance weighted	0.148664	0.79324	0.851337	0.977779	0.0520133	0.964969	0.00862299	1.20586e-05	TRUE	1.72788e-57	1.16028	0.245101	5.49266	4.11129	0.249695
PRSS2	4	Inverse variance weighted	-0.0961637	0.517285	0.852523	0.977779	-0.768492	0.243805	0.0205026	1.29811e-05	TRUE	1.44296e-138	0.908315	0.329545	2.50356	4.42663	0.218929
POR	2	Inverse variance weighted	0.114694	0.624276	0.85423	0.977779			0.010383	4.53861e-06	TRUE	3.06462e-71	1.12153	0.329926	3.81246	1.5144	0.218469
IGFBP7	6	Inverse variance weighted	-0.0720846	0.395507	0.85538	0.977779	0.0503506	0.774952	0.0355353	2.17631e-05	TRUE	2.32364e-241	0.930452	0.428579	2.02003	7.45729	0.188791
TMEM132C	4	Inverse variance weighted	-0.0861611	0.473362	0.855568	0.977779	-0.250027	0.157065	0.0381363	2.18412e-05	TRUE	9.11294e-260	0.917446	0.362783	2.32014	7.45149	0.0588181
RNASE3	7	Inverse variance weighted	0.0763532	0.423748	0.857007	0.977779	0.481997	0.415604	0.0345416	2.65652e-05	TRUE	4.19236e-233	1.07934	0.47039	2.47663	9.11402	0.167266
PLA2G2A	6	Inverse variance weighted	0.0479513	0.270213	0.859149	0.977779	-0.139952	0.21382	0.050776	9.88682e-06	TRUE	0	1.04912	0.617753	1.7817	3.37882	0.641797
SIRPB1	8	Inverse variance weighted	0.0444086	0.251158	0.859653	0.977779	0.309536	0.130542	0.0951628	4.13168e-05	TRUE	0	1.04541	0.638994	1.71032	14.1882	0.0479329
MSMB	2	Inverse variance weighted	0.032658	0.186312	0.860855	0.977779			0.0320365	9.1369e-06	TRUE	1.02136e-220	1.0332	0.717119	1.48859	3.05768	0.0803563
BOLA1	2	Inverse variance weighted	-0.177664	1.0184	0.861509	0.977779			0.0302396	2.46907e-05	TRUE	2.24033e-203	0.837224	0.113752	6.16203	8.26519	0.00404125
GSTA1	4	Inverse variance weighted	-0.119667	0.690978	0.862506	0.977779	0.247556	0.305406	0.0307958	3.04012e-05	TRUE	5.68284e-206	0.887216	0.229011	3.43718	10.3826	0.0155785
FUT10	10	Inverse variance weighted	0.0427739	0.248283	0.863218	0.977779	0.397542	0.15263	0.0972215	2.35868e-05	TRUE	0	1.0437	0.641555	1.69793	8.1062	0.52348
ANGPTL3	6	Inverse variance weighted	0.0495297	0.290829	0.86477	0.977779	0.236088	0.390906	0.0331561	4.51864e-06	TRUE	6.48627e-231	1.05078	0.594226	1.8581	1.52962	0.909626
FAM177A1	4	Inverse variance weighted	0.0974268	0.572788	0.864938	0.977779	-0.125766	0.75154	0.0358839	3.1992e-05	TRUE	2.85052e-241	1.10233	0.358711	3.3875	10.9299	0.0121111
FOLR3	7	Inverse variance weighted	-0.0244306	0.14624	0.867324	0.977779	-0.029376	0.781785	0.0898531	1.23683e-05	TRUE	0	0.975865	0.732669	1.29979	4.23833	0.644459
PRTN3	5	Inverse variance weighted	0.0475836	0.28738	0.86849	0.977779	-0.0559617	0.725288	0.0364312	1.01846e-05	TRUE	1.49429e-251	1.04873	0.597093	1.842	3.48558	0.480075
COLEC12	3	Inverse variance weighted	0.113774	0.68837	0.868723	0.977779	0.322047	0.69565	0.0100556	9.85703e-06	TRUE	1.27252e-67	1.1205	0.290709	4.31881	3.35423	0.186913
MANEA	5	Inverse variance weighted	0.0436327	0.266355	0.869877	0.977779	-0.197799	0.556467	0.0414714	1.82523e-05	TRUE	1.2368e-284	1.0446	0.61976	1.76066	6.25392	0.180971
CHST15	2	Inverse variance weighted	-0.274536	1.69983	0.871693	0.977779			0.00559518	1.35661e-05	TRUE	5.78439e-37	0.759925	0.0271548	21.2664	4.56047	0.0327181
UROD	2	Inverse variance weighted	-0.063869	0.397249	0.872268	0.977779			0.0273075	8.19698e-07	TRUE	3.96138e-192	0.938128	0.430642	2.04366	0.256889	0.612266
RETN	4	Inverse variance weighted	0.0909358	0.566403	0.872448	0.977779	0.0229207	0.978605	0.0480727	1.86966e-05	TRUE	0	1.0952	0.360878	3.32372	6.39415	0.0939316
HSPB1	3	Inverse variance weighted	0.050443	0.31547	0.872962	0.977779	-0.0117323	0.928279	0.0291983	6.71368e-07	TRUE	7.90218e-206	1.05174	0.566726	1.95182	0.20601	0.902123
VIM	2	Inverse variance weighted	-0.166448	1.06841	0.876198	0.977779			0.00367455	1.13093e-06	TRUE	2.18647e-26	0.846667	0.104296	6.87321	0.365824	0.545289
ALAD	4	Inverse variance weighted	-0.0742954	0.4844	0.878101	0.977779	0.114761	0.53364	0.0199659	2.41109e-06	TRUE	8.25206e-139	0.928397	0.359257	2.39918	0.808141	0.847519
COL6A1	9	Inverse variance weighted	0.034496	0.226948	0.879187	0.977779	0.321352	0.269191	0.107532	3.47404e-05	TRUE	0	1.0351	0.663437	1.61497	11.9488	0.153505
SERPINA9	3	Inverse variance weighted	0.083134	0.553547	0.880619	0.977779	-0.00648858	0.994472	0.0129884	5.32921e-07	TRUE	2.21875e-91	1.08669	0.367211	3.21583	0.161267	0.922532
DNAJB11	2	Inverse variance weighted	-0.144584	0.990898	0.883991	0.977779			0.0044543	2.16192e-06	TRUE	2.23719e-31	0.865382	0.12409	6.035	0.724431	0.394694
NAGLU	8	Inverse variance weighted	0.03123	0.214438	0.884208	0.977779	-0.0652092	0.773915	0.083048	9.52914e-06	TRUE	0	1.03172	0.677687	1.57071	3.26571	0.859382
CD68	3	Inverse variance weighted	0.115367	0.792653	0.88428	0.977779	-0.207632	0.477966	0.00382135	3.7893e-06	TRUE	1.18345e-26	1.12229	0.237347	5.30669	1.28587	0.525746
CNRIP1	5	Inverse variance weighted	-0.0340523	0.233971	0.884284	0.977779	0.0527059	0.769208	0.0389315	8.53769e-06	TRUE	3.66919e-270	0.966521	0.611014	1.52887	2.92377	0.570662
AMY1A	8	Inverse variance weighted	-0.0344454	0.247526	0.889325	0.977779	-0.0140521	0.981168	0.116058	5.52088e-05	TRUE	0	0.966141	0.59476	1.56942	18.991	0.00821559
LY9	5	Inverse variance weighted	0.0374484	0.269382	0.889438	0.977779	-0.316895	0.0875182	0.0383588	1.93007e-05	TRUE	4.25675e-262	1.03816	0.612296	1.76022	6.62554	0.15705
THBS4	3	Inverse variance weighted	0.0684545	0.496478	0.890335	0.977779	0.291499	0.506614	0.0209945	9.32014e-06	TRUE	4.64128e-143	1.07085	0.404686	2.83361	3.18457	0.20346
CLPS	7	Inverse variance weighted	-0.0493112	0.35849	0.890594	0.977779	-0.650232	0.575643	0.0411256	2.46412e-05	TRUE	3.05964e-280	0.951885	0.471446	1.92193	8.47291	0.205462
PLXND1	3	Inverse variance weighted	-0.0727224	0.529258	0.890711	0.977779	0.29388	0.344775	0.0205007	8.1588e-06	TRUE	5.22691e-140	0.929859	0.329537	2.6238	2.78794	0.248089
CD209	5	Inverse variance weighted	-0.0432181	0.314828	0.890813	0.977779	-0.0724689	0.849372	0.0320873	7.63513e-06	TRUE	1.02303e-221	0.957703	0.516707	1.77508	2.61477	0.624209
COL6A2	5	Inverse variance weighted	0.0588875	0.430585	0.891219	0.977779	-0.900189	0.14266	0.0392494	1.93592e-05	TRUE	2.02706e-268	1.06066	0.456093	2.46658	6.64659	0.155785
TALDO1	3	Inverse variance weighted	0.149181	1.0939	0.891524	0.977779	0.622576	0.442862	0.00735037	4.67276e-06	TRUE	1.9661e-50	1.16088	0.136034	9.90675	1.5932	0.45086
FAM151A	3	Inverse variance weighted	0.0497965	0.370027	0.892948	0.977779	-0.0620815	0.738863	0.0245958	1.49746e-06	TRUE	3.80182e-172	1.05106	0.508925	2.1707	0.498409	0.77942
ACADSB	2	Inverse variance weighted	0.193327	1.45045	0.893966	0.977779			0.00555674	7.67036e-06	TRUE	1.29249e-37	1.21328	0.070682	20.8263	2.59959	0.106891
CHMP2B	2	Inverse variance weighted	-0.0505542	0.379739	0.894091	0.977779			0.0244709	7.10718e-07	TRUE	4.37412e-172	0.950702	0.451653	2.00117	0.227427	0.633439
GNPTG	2	Inverse variance weighted	0.0465273	0.34957	0.894115	0.977779			0.0277554	3.21227e-07	TRUE	4.17531e-196	1.04763	0.528015	2.07858	0.0930872	0.760289
EPHA4	3	Inverse variance weighted	-0.124582	0.937484	0.89428	0.977779	-0.0819743	0.895405	0.0120693	1.65121e-05	TRUE	5.57338e-80	0.882866	0.14057	5.54494	5.64576	0.0594346
NTN4	3	Inverse variance weighted	0.0702844	0.532738	0.895039	0.977779	0.364469	0.35946	0.0159681	9.5657e-06	TRUE	3.58218e-108	1.07281	0.377614	3.04789	3.27105	0.19485
LSAMP	3	Inverse variance weighted	0.0998771	0.763074	0.895864	0.977779	0.257787	0.299915	0.0112762	1.17066e-05	TRUE	1.57759e-75	1.10504	0.247648	4.9308	4.00371	0.135084
VTN	5	Inverse variance weighted	-0.0715011	0.551461	0.896837	0.977779	-0.196817	0.455015	0.0131294	4.8489e-06	TRUE	4.71646e-90	0.930995	0.315889	2.74385	1.65575	0.798739
ISOC1	2	Inverse variance weighted	-0.165033	1.28288	0.897641	0.977779			0.0119382	1.3895e-05	TRUE	1.38851e-79	0.847866	0.0685987	10.4794	4.71485	0.0299031
GALNT16	3	Inverse variance weighted	0.0628561	0.493774	0.898705	0.977779	0.16168	0.503735	0.0152599	3.42418e-06	TRUE	2.18929e-105	1.06487	0.404565	2.8029	1.1649	0.558528
ADH7	4	Inverse variance weighted	0.057452	0.45666	0.899883	0.977779	-0.0259562	0.872469	0.0249829	1.8748e-05	TRUE	3.61429e-168	1.05913	0.432747	2.5922	6.43286	0.0923484
KLK10	10	Inverse variance weighted	0.0481639	0.383519	0.900061	0.977779	-0.103535	0.305813	0.0519441	4.75652e-05	TRUE	0	1.04934	0.494834	2.22523	16.3783	0.0593899
MMP10	8	Inverse variance weighted	0.0397211	0.332269	0.904844	0.981829	0.914431	0.372961	0.0482905	4.48217e-06	TRUE	0	1.04052	0.542522	1.99565	1.53176	0.98119
ASIP	2	Inverse variance weighted	0.0679008	0.590769	0.908496	0.983206			0.0279022	1.76641e-07	TRUE	1.70308e-197	1.07026	0.336214	3.40692	0.0477189	0.827081
CHIT1	14	Inverse variance weighted	0.0151082	0.13194	0.908835	0.983206	0.227032	0.222692	0.158069	2.38229e-05	TRUE	0	1.01522	0.783884	1.31483	8.20421	0.830047
PSG3	8	Inverse variance weighted	0.02277	0.199832	0.909281	0.983206	0.0234465	0.853487	0.0743184	4.97851e-06	TRUE	0	1.02303	0.691494	1.51352	1.70427	0.974385
MGAT4B	5	Inverse variance weighted	0.0464034	0.415385	0.911052	0.983978	-0.0457508	0.928807	0.0393436	6.65355e-07	TRUE	6.52899e-279	1.0475	0.464056	2.36448	0.217023	0.994522
ENG	4	Inverse variance weighted	-0.054511	0.513232	0.915415	0.986469	0.39638	0.244798	0.0125292	1.28984e-05	TRUE	8.3268e-84	0.946948	0.346301	2.58939	4.43244	0.218397
S100A12	2	Inverse variance weighted	-0.0778971	0.75376	0.917689	0.986469			0.0167769	7.44629e-06	TRUE	2.1617e-114	0.92506	0.211133	4.05306	2.54133	0.110902
PSG5	6	Inverse variance weighted	0.0266754	0.261213	0.91866	0.986469	0.170606	0.279479	0.049834	4.94744e-06	TRUE	0	1.02703	0.615512	1.7137	1.69611	0.88939
BET1L	2	Inverse variance weighted	0.24783	2.43296	0.918865	0.986469			0.00342403	1.46008e-05	TRUE	1.65223e-22	1.28124	0.0108807	150.872	4.98464	0.0255733
IL11RA	2	Inverse variance weighted	-0.0303541	0.306082	0.921004	0.986469			0.0271145	1.15532e-07	TRUE	4.78691e-192	0.970102	0.532445	1.7675	0.0300166	0.862453
GUSB	2	Inverse variance weighted	0.120342	1.22063	0.921464	0.986469			0.0137855	1.25224e-05	TRUE	1.8559e-92	1.12788	0.103096	12.3391	4.27781	0.038613
CD7	4	Inverse variance weighted	0.0492541	0.500461	0.921601	0.986469	0.535063	0.284211	0.0184055	6.72321e-06	TRUE	6.20244e-126	1.05049	0.393903	2.80151	2.30938	0.510726
HIBCH	4	Inverse variance weighted	-0.0507831	0.517543	0.921834	0.986469	-0.282973	0.393453	0.0293881	1.72443e-05	TRUE	2.50013e-199	0.950485	0.34467	2.62112	5.92917	0.115107
ENTPD5	5	Inverse variance weighted	-0.0348613	0.375173	0.925967	0.989753	-0.5819	0.237219	0.0421712	1.66189e-05	TRUE	3.39764e-290	0.965739	0.46292	2.01472	5.72006	0.221052
KL	4	Inverse variance weighted	-0.0564722	0.629306	0.928496	0.990964	-0.261985	0.642167	0.0106109	1.55987e-05	TRUE	2.79714e-70	0.945093	0.275295	3.24452	5.36614	0.146868
LIFR	2	Inverse variance weighted	-0.0672441	0.757993	0.92931	0.990964			0.00740566	1.85901e-07	TRUE	7.55953e-53	0.934967	0.211631	4.1306	0.0562534	0.812519
BLVRB	2	Inverse variance weighted	0.0843222	0.963935	0.930292	0.990964			0.0033893	1.19339e-06	TRUE	2.10128e-24	1.08798	0.164476	7.19679	0.403983	0.525039
SERPINA3	18	Inverse variance weighted	0.020472	0.243274	0.932936	0.991258	0.0740686	0.718955	0.0605295	3.32701e-06	TRUE	0	1.02068	0.633595	1.64426	1.14051	1
GUCA2B	2	Inverse variance weighted	-0.0590303	0.707954	0.933548	0.991258			0.00573703	2.4313e-07	TRUE	3.55878e-41	0.942678	0.235365	3.7756	0.0769108	0.781528
COL10A1	2	Inverse variance weighted	-0.0362691	0.437554	0.933939	0.991258			0.0250512	3.55896e-07	TRUE	9.47963e-177	0.964381	0.409067	2.27354	0.115891	0.733535
SCUBE1	3	Inverse variance weighted	-0.0498271	0.617211	0.935657	0.991258	-0.239425	0.525733	0.00822931	5.20144e-06	TRUE	2.73386e-56	0.951394	0.283779	3.18963	1.78764	0.409091
GAS6	3	Inverse variance weighted	-0.0476233	0.592085	0.935893	0.991258	0.194785	0.755752	0.0283832	1.65191e-05	TRUE	1.73101e-192	0.953493	0.298761	3.04306	5.67964	0.0584361
ASRGL1	2	Inverse variance weighted	0.0350234	0.453921	0.938498	0.992889			0.0180337	5.97949e-07	TRUE	1.04588e-126	1.03564	0.425427	2.52113	0.2003	0.654479
CHL1	7	Inverse variance weighted	-0.025165	0.345246	0.941894	0.993127	-0.27278	0.378331	0.0334746	7.14754e-06	TRUE	8.30711e-232	0.975149	0.495668	1.91845	2.46012	0.872904
COL6A3	3	Inverse variance weighted	-0.0531567	0.731793	0.942093	0.993127	0.264071	0.46975	0.00976624	4.33854e-06	TRUE	4.55216e-67	0.948231	0.225943	3.97951	1.49123	0.474443
DEFB104A	3	Inverse variance weighted	-0.071322	0.99552	0.942886	0.993127	0.820758	0.365346	0.0052497	7.0943e-06	TRUE	1.18799e-35	0.931162	0.132319	6.55283	2.44079	0.295113
TNFRSF21	2	Inverse variance weighted	0.0599923	0.867434	0.944862	0.993127			0.00605317	8.97113e-07	TRUE	6.94601e-43	1.06183	0.193946	5.81338	0.304659	0.580976
ADH5	4	Inverse variance weighted	0.0986862	1.45869	0.946061	0.993127	0.587948	0.411426	0.015484	5.03865e-05	TRUE	3.42802e-98	1.10372	0.0632696	19.2541	17.3536	0.000597725
ITIH4	2	Inverse variance weighted	-0.0685767	1.04158	0.947506	0.993127			0.00355956	1.25751e-08	TRUE	2.22101e-26	0.933722	0.121229	7.19166	2.75939e-06	0.998675
AKR1A1	7	Inverse variance weighted	0.0131647	0.202101	0.948063	0.993127	0.000597697	0.998397	0.0686402	1.93033e-05	TRUE	0	1.01325	0.681845	1.50574	6.65366	0.354066
H6PD	4	Inverse variance weighted	0.0144668	0.22382	0.948464	0.993127	0.0224374	0.895129	0.048142	1.26954e-05	TRUE	0	1.01457	0.65428	1.57327	4.37302	0.223901
VWC2	4	Inverse variance weighted	-0.0368778	0.571405	0.948541	0.993127	0.096072	0.671651	0.0334443	1.87484e-05	TRUE	1.93525e-227	0.963794	0.314481	2.95375	6.45805	0.0913318
CPZ	2	Inverse variance weighted	-0.0636102	1.02104	0.950324	0.993127			0.00387679	4.85639e-07	TRUE	4.32956e-28	0.938371	0.126838	6.94225	0.163632	0.685834
MTHFSD	2	Inverse variance weighted	0.0548157	0.896774	0.951259	0.993127			0.00443888	5.56442e-07	TRUE	6.23055e-32	1.05635	0.182162	6.1257	0.188201	0.664418
CST3	3	Inverse variance weighted	-0.0249666	0.425229	0.95318	0.993127	-0.296277	0.403265	0.021716	5.99158e-06	TRUE	2.65346e-149	0.975342	0.423833	2.2445	2.06315	0.356446
STAMBP	2	Inverse variance weighted	-0.109948	1.91286	0.954164	0.993127			0.00265442	1.97435e-06	TRUE	3.8451e-19	0.89588	0.021086	38.0633	0.677715	0.410375
DECR2	6	Inverse variance weighted	0.0159218	0.278757	0.954452	0.993127	0.614689	0.162318	0.0476176	1.47399e-05	TRUE	0	1.01605	0.588345	1.75468	5.08096	0.406079
SFTPB	5	Inverse variance weighted	-0.00945603	0.169434	0.955494	0.993127	-0.184272	0.434911	0.0570907	1.11394e-05	TRUE	0	0.990589	0.71067	1.38076	3.83923	0.4282
GSR	2	Inverse variance weighted	-0.0486883	0.878276	0.955791	0.993127			0.00478672	9.63801e-07	TRUE	4.11118e-34	0.952478	0.170314	5.32671	0.329374	0.566028
HBZ	5	Inverse variance weighted	-0.0181378	0.364719	0.960337	0.993895	0.301675	0.332297	0.0453858	2.01705e-05	TRUE	0	0.982026	0.480471	2.00714	6.95317	0.138384
DSG2	4	Inverse variance weighted	-0.0208032	0.431452	0.961544	0.993895	-0.375993	0.596566	0.0207487	4.51401e-06	TRUE	3.54007e-143	0.979412	0.420441	2.28152	1.55471	0.669702
CPQ	6	Inverse variance weighted	0.0114204	0.242397	0.962422	0.993895	0.18099	0.491163	0.0621269	2.40794e-06	TRUE	0	1.01149	0.628966	1.62664	0.828359	0.975189
SEMA6B	2	Inverse variance weighted	0.0306747	0.726509	0.966322	0.993895			0.00648676	5.16838e-09	TRUE	7.45624e-47	1.03115	0.248259	4.28291	1.20371e-35	1
NCAM2	10	Inverse variance weighted	0.0119456	0.294875	0.967686	0.993895	0.191039	0.567575	0.0461836	2.33482e-05	TRUE	0	1.01202	0.567787	1.80381	8.05194	0.52892
UNC5D	2	Inverse variance weighted	-0.0431165	1.09539	0.968602	0.993895			0.00521567	4.39078e-06	TRUE	5.64965e-36	0.9578	0.111908	8.1976	1.51218	0.218806
GKN2	4	Inverse variance weighted	0.00895775	0.232604	0.96928	0.993895	0.029277	0.943751	0.0392778	3.66318e-06	TRUE	2.07937e-275	1.009	0.639579	1.59179	1.26207	0.738159
PI3	3	Inverse variance weighted	0.012949	0.367974	0.971928	0.993895	0.0335691	0.938404	0.028546	7.07044e-07	TRUE	4.07799e-201	1.01303	0.492491	2.08377	0.242644	0.885749
HEXB	2	Inverse variance weighted	0.0263071	0.767158	0.972645	0.993895			0.0265158	1.2346e-05	TRUE	1.19892e-180	1.02666	0.228248	4.61788	4.25357	0.0391679
MMP12	5	Inverse variance weighted	0.00621485	0.183105	0.972924	0.993895	-0.08576	0.427427	0.0355355	7.40251e-06	TRUE	2.18868e-246	1.00623	0.702808	1.44066	2.55222	0.63531
CRHBP	5	Inverse variance weighted	0.00768635	0.226574	0.972938	0.993895	0.00988853	0.922521	0.0349567	1.24473e-05	TRUE	3.52732e-240	1.00772	0.64636	1.57109	4.29226	0.367895
EPHB1	4	Inverse variance weighted	0.0112425	0.336006	0.973308	0.993895	0.00377489	0.98148	0.0305503	1.98422e-06	TRUE	4.45698e-214	1.01131	0.523442	1.95387	0.683303	0.877124
NT5E	4	Inverse variance weighted	-0.00895172	0.282363	0.974709	0.993895	-0.279151	0.404981	0.0364215	9.37276e-06	TRUE	7.99617e-252	0.991088	0.569849	1.72371	3.2319	0.357233
CAPN2	3	Inverse variance weighted	-0.0135382	0.440914	0.975505	0.993895	-0.141467	0.457101	0.0163773	6.14228e-06	TRUE	4.60654e-112	0.986553	0.415726	2.34118	2.11768	0.346858
APOH	2	Inverse variance weighted	0.0223886	0.742737	0.975953	0.993895			0.0204285	1.03795e-06	TRUE	4.12186e-143	1.02264	0.238502	4.38484	0.357116	0.550112
EFEMP1	2	Inverse variance weighted	-0.0255142	0.85038	0.976064	0.993895			0.0093298	6.75382e-09	TRUE	9.9855e-67	0.974809	0.184103	5.16152	0.00142936	0.969842
CD55	2	Inverse variance weighted	-0.0140051	0.485584	0.976991	0.993895			0.0282256	8.09293e-06	TRUE	3.49154e-194	0.986093	0.380697	2.5542	2.78921	0.0949013
SERPINB13	2	Inverse variance weighted	-0.0428581	1.49999	0.977206	0.993895			0.0149929	7.99925e-06	TRUE	6.73401e-102	0.958047	0.0506484	18.1221	2.75698	0.0968312
LRP8	2	Inverse variance weighted	0.0335645	1.19797	0.977648	0.993895			0.0154112	1.66745e-05	TRUE	1.12083e-102	1.03413	0.0988206	10.822	5.74712	0.0165157
NUDT2	4	Inverse variance weighted	-0.00926356	0.334127	0.977882	0.993895	-0.11207	0.334922	0.0329545	5.49994e-06	TRUE	6.325e-229	0.990779	0.514709	1.90718	1.89634	0.594199
TCN1	7	Inverse variance weighted	-0.00617588	0.23667	0.979182	0.994131	-0.0831926	0.702342	0.0444558	1.37105e-05	TRUE	1.08804e-307	0.993843	0.624971	1.58043	4.72855	0.579069
SERPINB4	3	Inverse variance weighted	-0.0110606	0.548596	0.983914	0.996731	0.040002	0.790814	0.0109194	1.05309e-06	TRUE	1.65911e-76	0.989	0.33746	2.89848	0.362837	0.834086
AKR1C4	5	Inverse variance weighted	-0.00651035	0.37439	0.986126	0.996731	1.75975	0.167291	0.0375521	1.46595e-05	TRUE	7.34207e-258	0.993511	0.476963	2.06947	5.05619	0.281581
LY75	11	Inverse variance weighted	-0.00377773	0.232558	0.98704	0.996731	-0.304394	0.544184	0.15714	2.2041e-05	TRUE	0	0.996229	0.631542	1.57151	7.60245	0.667605
SPINK2	6	Inverse variance weighted	-0.00634793	0.394347	0.987157	0.996731	-0.64422	0.188693	0.0537851	2.03248e-05	TRUE	0	0.993672	0.458742	2.15238	7.01034	0.219873
ASPN	4	Inverse variance weighted	-0.00474185	0.327771	0.988457	0.996731	-0.121947	0.874278	0.0357267	9.92303e-07	TRUE	2.89622e-252	0.995269	0.523524	1.8921	0.342069	0.951932
CAT	2	Inverse variance weighted	-0.012492	1.00421	0.990075	0.996731			0.014619	1.01703e-05	TRUE	9.90717e-99	0.987586	0.137967	7.06925	3.50755	0.0610898
ELANE	8	Inverse variance weighted	-0.00379991	0.307821	0.990151	0.996731	0.19708	0.437487	0.0435129	2.17236e-05	TRUE	3.75262e-298	0.996207	0.544914	1.82126	7.49304	0.379408
MMP19	3	Inverse variance weighted	0.0100542	0.857613	0.990646	0.996731	0.375605	0.626756	0.00475453	6.2085e-06	TRUE	1.77089e-32	1.0101	0.188084	5.42477	2.14138	0.342772
FAP	4	Inverse variance weighted	0.00463476	0.428895	0.991378	0.996731	0.318733	0.322347	0.0227068	6.7258e-06	TRUE	6.09495e-156	1.00465	0.433441	2.3286	2.31986	0.508727
CA3	2	Inverse variance weighted	0.00447502	0.638564	0.994409	0.99767			0.0150119	1.3297e-06	TRUE	7.78442e-105	1.00449	0.287334	3.51156	0.458607	0.498276
FMOD	2	Inverse variance weighted	0.00524791	1.01272	0.995865	0.99767			0.0081042	8.36071e-06	TRUE	1.07891e-54	1.00526	0.138112	7.31691	2.88381	0.0894739
DNER	5	Inverse variance weighted	0.00208074	0.44055	0.996232	0.99767	-0.177854	0.419886	0.0195098	1.16464e-05	TRUE	4.66046e-132	1.00208	0.422572	2.37633	4.01723	0.403679
SH3BP2	2	Inverse variance weighted	-0.00166137	0.480274	0.99724	0.99767			0.0266237	5.0004e-06	TRUE	2.93459e-184	0.99834	0.389459	2.55915	1.7248	0.189077
EFNA5	2	Inverse variance weighted	0.00544283	1.86399	0.99767	0.99767			0.00822417	1.95542e-05	TRUE	1.17623e-53	1.00546	0.0260436	38.8174	6.74485	0.00940186
